# RIM-Binding Protein 2 organizes Ca<sup>2+</sup> channel topography and regulates release probability and vesicle replenishment at a fast central synapse

1 **Tanvi Butola**<sup>1,2,3,4\*</sup>, **Theocharis Alvanos**<sup>1,2,3,4,\*</sup>, **Anika Hintze**<sup>1,4,5</sup>, **Peter Koppensteiner**<sup>6</sup>, **David**  
2 **Kleindienst**<sup>6</sup>, **Ryuichi Shigemoto**<sup>6</sup>, **Carolyn Wichmann**<sup>1,4,5,7</sup>, **Tobias Moser**<sup>1,2,4,7</sup>

3 <sup>1</sup>Institute for Auditory Neuroscience (IAN) and InnerEarLab, University Medical Center Göttingen,  
4 37075 Göttingen, Germany

5 <sup>2</sup>Synaptic Nanophysiology Group, Max Planck Institute for Biophysical Chemistry Göttingen, Germany

6 <sup>3</sup>International Max Planck Research School for Neurosciences and Göttingen Graduate Center for  
7 Neurosciences, Biophysics, and Molecular Biosciences (GGNB), University of Göttingen, Germany

8 <sup>4</sup>Collaborative Research Center 1286, University of Göttingen, Göttingen, Germany

9 <sup>5</sup>Molecular Architecture of Synapses Group, IAN and Center for Biostructural Imaging of  
10 Neurodegeneration (BIN), Göttingen, Germany

11 <sup>6</sup>Molecular Neuroscience Group, Institute for Science and Technology Austria (IST), Klosterneuburg,  
12 Austria

13 <sup>7</sup>Cluster of Excellence "Multiscale Bioimaging: from molecular machines to networks of excitable  
14 cells", University of Göttingen, 37075 Göttingen, Germany

15 **Correspondence:** Tobias Moser, [tmoser@gwdg.de](mailto:tmoser@gwdg.de)

16 **Main Figures:** 10, **Extended Data Figures:** 8, **Tables:** 7

17 **Words:** Abstract: 242, Significance Statement: 110, Introduction: 638, Discussion: 1544

18 **Keywords:** cochlear nucleus, calyceal synapse, short-term plasticity, readily releasable pool, active  
19 zone topography, Ca<sup>2+</sup> influx-exocytosis coupling

20 **Running title:** RIM-BP2 promotes vesicular release and replenishment

## 21 **Author Contribution**

22 This study was conceived by T.M. and T.B. The experimental work was performed by T.B. (slice  
23 electrophysiology, *in vivo* electrophysiology, electron microscopy in the lab of R.S. with help of P.K.,  
24 D.K. and R.S.), T.A. (slice electrophysiology, immunohistochemistry) and A.H. (electron microscopy).  
25 T.M., T. A., and T.B. prepared the manuscript with contributions of A.H. and C.W.

## 26 **Acknowledgements**

27 We thank S. Gerke, A.J. Goldak and C. Senger-Freitag for expert technical assistance, G. Hoch for  
28 developing image analysis routines, and S. Chepurwar and N. Strenzke for technical support and  
29 discussion regarding *in vivo* experiments. We thank Drs. Christian Rosenmund, Katharina Grauel and  
30 Stephan Sigrist for providing RIM-BP2 KO mice. We thank J. Neef for help with the STED imaging and  
31 image analysis. We thank E. Neher and S. Rizzoli for discussion and comments on the manuscript. Our  
32 gratitude also goes to C. H. Huang and J. Neef for constant support and scientific discussion. This work  
33 was funded by the Deutsche Forschungsgemeinschaft (DFG, German Research Foundation) through  
34 the Collaborative Sensory Research Center 1286 (to C.W. (A4) and T.M. (B5)) and under Germany's  
35 Excellence Strategy - EXC 2067/1- 390729940.

## 36 **Conflict of interest**

37 The authors declare no conflict of interest.

38

39 **Abstract**

40 RIM-Binding Protein 2 (RIM-BP2) is a multi-domain protein of the presynaptic active zone (AZ). By  
41 binding to Rab-interacting protein (RIM), bassoon and voltage-gated  $\text{Ca}^{2+}$  channels ( $\text{Ca}_v$ ), it is  
42 considered to be a central organizer of the topography of  $\text{Ca}_v$  and release sites of synaptic vesicles  
43 (SVs) at the AZ. Here, we investigated the role of RIM-BP2 at the endbulb of Held synapse of auditory  
44 nerve fibers with bushy cells of the cochlear nucleus, a fast relay of the auditory pathway with high  
45 release probability. Disruption of RIM-BP2 lowered release probability altering short-term plasticity  
46 and reduced evoked excitatory postsynaptic currents (EPSCs). Analysis of SV pool dynamics during  
47 high frequency train stimulation indicated a reduction of SVs with high release probability but an  
48 overall normal size of the readily releasable SV pool (RRP). The  $\text{Ca}^{2+}$ -dependent fast component of SV  
49 replenishment after RRP depletion was slowed. Ultrastructural analysis by super-resolution light and  
50 electron microscopy revealed an impaired topography of presynaptic  $\text{Ca}_v$  and a reduction of docked  
51 and membrane-proximal SVs at the AZ. We conclude that RIM-BP2 organizes the topography of  $\text{Ca}_v$ ,  
52 and promotes SV tethering and docking. This way RIM-BP2 is critical for establishing a high initial  
53 release probability as required to reliably signal sound onset information that we found to be  
54 degraded in bushy cells of RIM-BP2-deficient mice *in vivo*.

55 **Significance Statement**

56 RIM-binding proteins (RIM-BPs) are key organizers of the active zone (AZ). Using a multidisciplinary  
57 approach to the calyceal endbulb of Held synapse that transmit auditory information at rates of up  
58 to hundreds of Hertz with sub-millisecond precision we demonstrate a requirement for RIM-BP2 for  
59 normal auditory signaling. Endbulb synapses lacking RIM-BP2 show a reduced release probability  
60 despite normal whole-terminal  $\text{Ca}^{2+}$  influx and abundance of the key priming protein Munc13-1, a

61 reduced rate of SV replenishment, as well as an altered topography of  $\text{Ca}_v2.1$   $\text{Ca}^{2+}$  channels, and fewer  
62 docked and membrane proximal synaptic vesicles. This hampers transmission of sound onset  
63 information likely affecting downstream neural computations such as of sound localization.

## 64 Introduction

65 Active zones (AZs) are specialized regions at the presynaptic terminals where neurotransmitter  
66 release occurs. AZs employ a sophisticated machinery to enable ultrafast coupling of the incoming  
67 action potential to the release of transmitter via  $\text{Ca}^{2+}$ -triggered SV fusion. Voltage-gated  $\text{Ca}^{2+}$  channels  
68 ( $\text{Ca}_v$ ) and SV release sites represent the core machinery, and their relative topography at the AZ co-  
69 determines the release probability (recent reviews in: Kaeser and Regehr, 2014; Schneggenburger  
70 and Rosenmund, 2015; Walter et al., 2018; Dittman and Ryan, 2019). The function and abundance of  
71  $\text{Ca}_v$  (recent reviews in: Pangrsic et al., 2018; Dolphin and Lee, 2020) is positively regulated by auxiliary  
72 subunits and multi-domain proteins of the AZ such as RIM-BP, RIM, piccolo, bassoon, CAST and ELKS.

73 Several of these proteins promote the clustering of  $\text{Ca}^{2+}$  channels at the AZ and/or their  
74 interaction with the SV release sites (Gundelfinger and Fejtova, 2012; Südhof, 2012; Moser et al.,  
75 2019). RIM and RIM-BPs, in particular, have been considered as molecular linkers of  $\text{Ca}_v$  and vesicular  
76 release sites. Direct and indirect interactions of RIMs with  $\text{Ca}_v$  are well established (Kiyonaka et al.,  
77 2007; Gebhart et al., 2010; Kaeser et al., 2011; Picher et al., 2017). Proline-rich sequences of RIMs  
78 have been shown to bind the SH3-domains of RIM-BP that directly interacts with  $\text{Ca}_v$  (Hibino et al.,  
79 2002; Kaeser et al., 2011). Deletion of *Drosophila* RIM-BP disrupted  $\text{Ca}_v$  clustering at the AZs of larval  
80 neuromuscular junctions consequently impairing their functional coupling to SV release: altered  
81 short-term plasticity demonstrating a reduced release probability (Liu et al., 2011). Of the three  
82 mammalian RIM-BP isoforms, RIM-BP1 and 2 are neuron-specific, whereby RIM-BP2 seems to be the  
83 isoform that is most relevant for transmission at conventional synapses (Acuna et al., 2015; Grauel et  
84 al., 2016). Disruption of RIM-BP1 and 2 did not alter the  $\text{Ca}^{2+}$  current at the calyx of Held synapse  
85 (Acuna et al., 2015), while lack of RIM-BP2 (Krinner et al., 2017; Luo et al., 2017) and of RIM-BP1 (Luo  
86 et al., 2017) reduced the  $\text{Ca}_v$  number at ribbon-type AZs. An alteration of the  $\text{Ca}_v$  topography at the

87 AZs has been reported based on super-resolution immunofluorescence microscopy (Grauel et al.,  
88 2016; Krinner et al., 2017).

89 A loosening of the otherwise tight spatial relationship of  $Ca_v$  and SV release sites was indicated  
90 by the reduced release probability and a greater sensitivity to the intracellular presence of the “slow”  
91  $Ca^{2+}$  chelator EGTA in the absence of RIM-BP(1)/2 (Acuna et al., 2015; Grauel et al., 2016; Luo et al.,  
92 2017). A similar conclusion was reached in sensory hair cells where, unlike in CNS synapses, SV  
93 replenishment was impaired in the absence of RIM-BP2 (Krinner et al., 2017). However, in contrast  
94 to the dramatic impairment of synaptic transmission at RIM-BP deficient neuromuscular junctions in  
95 *Drosophila* (Liu et al., 2011), transmission was affected more subtly by RIM-BP deletion at mammalian  
96 synapses (Acuna et al., 2015; Grauel et al., 2016; Krinner et al., 2017; Luo et al., 2017). This might  
97 relate to partial compensation by other candidate linkers of  $Ca_v$  and SV release sites such as long RIM  
98 isoforms (Acuna *et al*, 2016). Recently, two alternative actions of RIM-BPs were indicated based on  
99 molecular perturbations studies in hippocampal neurons: i) binding to  $Ca_v$  enabling their tight  
100 coupling to SVs or ii) promoting SV priming by interaction with Munc13-1 (Brockmann et al., 2020).  
101 Here we aimed to further characterize the function of RIM-BP2 at the endbulb of Held synapse, the  
102 first central auditory synapse (von Gersdorff and Borst, 2002; Yu and Goodrich, 2014), that employs  
103 high vesicular release probability at its more than 100 AZs for reliable and temporally precise signal  
104 transmission from auditory nerve fibers (ANFs) to bushy cells (BCs) at frequencies of hundreds of  
105 Hertz (Trussell, 1999; Wang et al., 2011). We combined electrophysiological analysis with studies of  
106 the molecular composition and ultrastructure of the AZ in RIM-BP2-deficient endbulbs.

107

108

## 109 **Materials and Methods**

### 110 **Animals**

111 The constitutive RIM-BP2 knockout (RIM-BP2 KO) mice were described in (Grauel et al., 2016) and  
112 kindly provided to us by Drs. Christian Rosenmund, Katharina Grauel and Stephan Sigrist. All  
113 experiments were performed in compliance with the guidelines of the German animal welfare act  
114 and were approved by the board for animal welfare of the University Medical Center Göttingen and  
115 the animal welfare office of the state of Lower Saxony.

### 116 **Slice electrophysiology**

117 Slice preparation: Acute parasagittal slices (150 $\mu$ m) from the anteroventral cochlear nucleus (aVCN)  
118 were obtained as described previously (Mendoza Schulz et al., 2014). Briefly, after sacrifice by  
119 decapitation, brains were dissected out and quickly immersed in ice-cold low Na<sup>+</sup> and low Ca<sup>2+</sup> cutting  
120 solution containing (in mM): 50 NaCl, 26 NaHCO<sub>3</sub>, 120 sucrose, 1.25 NaH<sub>2</sub>PO<sub>4</sub>.H<sub>2</sub>O, 2.5 KCl, 20 glucose,  
121 0.2 CaCl<sub>2</sub>, 6 MgCl<sub>2</sub>, 0.7 Na L-ascorbate, 2 Na pyruvate, 3 myo-inositol, 3 Na L-lactate with pH adjusted  
122 to 7.4 and osmolarity of around 310 mOsm/l. After removal of the meninges from the ventral face of  
123 the brainstem, the two hemispheres were separated by a midsagittal cut and the forebrain was  
124 removed at the pons-midbrain junction. The brain blocks containing brain stem and cerebellum were  
125 then glued (cyanoacrylate glue; Loctite 401, Henkel) to the stage of a VT 1200S vibratome (Leica  
126 microsystems, Wetzlar, Germany) such that the medial side was glued on, the ventral side was facing  
127 the blade and the lateral side was facing upwards, submerged in ice-cold cutting solution. For  
128 sectioning, the blade was positioned at the height of cerebellar flocculus and sections were cut at a  
129 blade feed rate of 0.02 mm/s with an amplitude of 1.50 mm. Slices were incubated for 30min in  
130 artificial cerebrospinal fluid (aCSF) maintained at 35°C, and then kept at room temperature (22-24°C)

131 until recording. Composition of aCSF was identical to the cutting solution except (in mM): 125 NaCl,  
132 13 glucose, 2 CaCl<sub>2</sub> and 1 MgCl<sub>2</sub>. The pH of the solution was adjusted to 7.4 and osmolarity was around  
133 310 mOsm/l. All solutions were continuously aerated with carbogen (95% O<sub>2</sub>, 5% CO<sub>2</sub>). For  
134 presynaptic endbulb recordings, coronal sections were made instead of parasagittal as described  
135 above. The only difference was that after the forebrain was removed at the pons-midbrain junction,  
136 the dissected brain was not cut midsagittally and the brain block containing the brain stem and the  
137 cerebellum was then glued to the vibratome stage with the caudal aspect facing upwards and the  
138 ventral side towards the blade.

139 Electrophysiology: Patch-clamp recordings were made from BCs of aVCN using EPC10 USB Patch  
140 clamp amplifier controlled by the Patchmaster software (HEKA Elektronik, Lambrecht/Pfalz,  
141 Germany). Sampling interval and filter settings were 25 μs and 7.3 kHz respectively. Cells were  
142 visualized by differential interference contrast (DIC) microscopy through a 40x water-immersion  
143 objective (NA 0.8; Zeiss, Oberkochen, Germany) using an Axioscope 2 FS plus microscope (Zeiss). All  
144 experiments were conducted at a temperature of 33-35°C, maintained by constant superfusion (flow  
145 rate 3-4 ml/min) of aCSF, heated by an inline solution heater (SH-27B with TC-324B controller; Warner  
146 Instruments, Hamden, CT, USA) and monitored by a thermistor placed between the inflow site and  
147 the slice, in the recording chamber.

148 Patch pipettes were pulled with P-87 micropipette puller (Sutter Instruments Co., Novato, CA, USA)  
149 from borosilicate glass capillaries with filament (GB150F, 0.86x1.50x80mm; Science Products,  
150 Hofheim, Germany). Open tip pipette resistance was 1.5-3 MΩ when filled with intracellular solution  
151 containing (in mM): 115 K-gluconate, 10 HEPES, 8 EGTA, 10 Na<sub>2</sub>Phosphocreatine, 4 ATP-Mg, 0.3 GTP-  
152 Na, 4.5 MgCl<sub>2</sub>, 10 NaCl and 1 *N*-(2,6-dimethylphenyl carbamoylmethyl) triethylammonium chloride  
153 (QX-314; Alomone Labs, Jerusalem, Israel) to block sodium channels, with a pH of 7.35 and an



154 osmolarity of 300 mOsm/l. Additionally, 1 mM of fluorescent dye Alexa-488 (Invitrogen) was added  
155 to the recording pipette and cell structure was examined during experiments using a HXP 120 mercury  
156 lamp, with FITC filter (Semrock hardcoat). Cells were voltage-clamped at a holding potential of  $-70$   
157 mV, after correction for a liquid junction potential of 12 mV. Mean series resistance was around 5  
158 M $\Omega$  and was compensated up to 70% with a 10  $\mu$ s lag. Presynaptic ANF were minimally stimulated  
159 with a monopolar electrode in a patch pipette filled with aCSF, placed at a distance of at least three  
160 cell diameters from the cell being recorded. Stimulating currents of 10-20  $\mu$ A were delivered through  
161 a stimulus isolator (A360 World Precision Instruments, Sarasota, FL, USA). For the main set of  
162 recordings, bath solution (aCSF) was supplemented with: 1 mM kynurenic acid sodium salt (abcam  
163 Biochemicals, Cambridge, UK), a low-affinity AMPAR antagonist, to prevent receptor  
164 saturation/desensitization, 100 $\mu$ M Cyclothiazide to prevent AMPAR desensitization, 10  $\mu$ M  
165 Bicuculline methchloride, a GABA<sub>A</sub> receptor antagonist and 2  $\mu$ M Strychnine hydrochloride, a glycine  
166 receptor antagonist.

167 For patch-clamp experiments at the endbulbs of Held patch-pipettes were coated with either dental  
168 wax or Sylgard to minimize fast capacitive transients and stray capacitance during voltage clamp  
169 experiments. Open tip pipette resistance was 4-5 M $\Omega$  with an intracellular solution containing (in  
170 mM): 130 Cs-methanesulfonate, 20 TEA-Cl, 10 HEPES, 0.5 EGTA, 5 Na<sub>2</sub>Phosphocreatine, 4 ATP-Mg,  
171 0.3 GTP-Na, with pH adjusted to 7.3 with CsOH osmolarity of 320 mOsm/l. For anatomical  
172 confirmation 1 mM of fluorescent dye Alexa-488 (Invitrogen) was added to the recording pipette. The  
173 bath solution differed from the aCSF normally used (in mM): 85 NaCl, 25 glucose, 2 CaCl<sub>2</sub> and 1 MgCl<sub>2</sub>.  
174 The pH of the solution was adjusted to 7.4 and osmolarity was around 310mOsm/l. Additionally, the  
175 bath solution was supplemented with 1  $\mu$ M TTX, 1 mM 4-AP, and 40 mM TEA-Cl to suppress voltage-  
176 gated Na<sup>+</sup> and K<sup>+</sup> currents. Presynaptic terminals were voltage-clamped at a holding potential of  $-80$

177 mV, a liquid junction potential of 3 mV was ignored. Series resistance was  $<30 \text{ M}\Omega$  and was  
178 compensated up to 50% with a  $10 \mu\text{s}$  lag.

### 179 **Systems physiology: Extracellular recordings from single bushy cells**

180 Extracellular recordings from single units of bushy cells (BCs) in the aVCN were performed as  
181 described before (Jing et al., 2013; Strenzke et al., 2016) on 9 to 10-week-old mice. After anesthetizing  
182 the mice with i.p. injection of urethane (1.32 mg/kg), xylazine (5 mg/kg) and buprenorphine (0.1  
183 mg/kg), a tracheostomy was performed, their cartilaginous ear canals were removed and then they  
184 were positioned in a custom-designed head-holder and stereotactic system. After partial removal of  
185 the occipital bone and cerebellum to expose the surface of the cochlear nucleus, a glass  
186 microelectrode was advanced through the anterior portion of the aVCN to avoid the auditory nerve  
187 fibers and instead target the area with a higher fraction of spherical BCs. Acoustic stimulation was  
188 provided by an open field Avisoft ScanSpeak Ultrasonic Speaker (Avisoft Bioacoustics). “Putative”  
189 spherical BCs were identified and differentiated from other cell types in the cochlear nucleus by their  
190 characteristic 'Primary-like' peristimulus time histogram (PSTH) (Taberner and Liberman, 2005),  
191 irregular firing pattern demonstrated by a  $\geq 0.5$  coefficient of variation of inter-spike intervals of  
192 adapted responses, and a first spike latency of  $\leq 5 \text{ ms}$ . Bushy cells units were distinguished from  
193 auditory nerve fiber (ANFs, also having 'Primary-like' PSTH) based on their stereotactic position ( $<1.1$   
194 mm below the surface of the cochlear nucleus). Recordings were performed using TDT system III  
195 hardware and an ELC-03XS amplifier (NPI electronics).

196

197

198

## 199 **Immunohistochemistry and confocal imaging**

200 Mice at postnatal day 20-24 were deeply and terminally anesthetized with Xylazin (5 mg/kg) and  
201 Ketamin (10 mg/ml) in 0.9% saline and then transcardially perfused with 2% freshly prepared ice-cold  
202 paraformaldehyde with pH adjusted to 7.4. The fixed brain was then removed and brainstem was  
203 dissected with a coronal cut few millimetres nasal to the junction between occipital cortex and  
204 cerebellum. The brain block was washed overnight in 30% sucrose solution in PBS. For sectioning, the  
205 brain block was embedded in Tissue Tek Cryomatrix (Thermo Fisher Scientific, Waltham, MA, USA)  
206 and then fixed on the stage of the cryostat (Figocut E cryotome, Reichert-Jung, Depew, NY, USA) such  
207 that the caudal aspect was facing upwards and the dorsal side was towards the blade. Advancing from  
208 caudal to nasal, 30  $\mu$ m coronal sections were cut (chamber temperature: -20°C, object temperature:  
209 -22°C) and discarded until the appearance of the 7<sup>th</sup> cranial nerve. Subsequent sections containing  
210 aVCN were collected onto electrostatically charged microscope slides (SuperFrost Plus, ThermoFisher  
211 Scientific, MA, USA). For parallel processing, one slice of each genotype was collected per slide.

212         Thereafter, the slices were washed for 10 min in PBS and incubated in Goat Serum Dilution  
213 Buffer (GSDB; 16% normal goat serum, 450 mM NaCl, 0.3% Triton X-100, 20 mM phosphate buffer,  
214 pH 7.4) for 1 h, followed by incubation in primary antibodies diluted in GSDB, for 3 h, in a wet chamber  
215 at room temperature. After washing 2x10 min with wash buffer (450 mM NaCl, 0.3% Triton X-100, 20  
216 mM phosphate buffer) and 2x10 min with PBS, the slices were incubated with secondary antibodies  
217 diluted in GSDB, for 1 h, in a light-protected wet chamber at room temperature. The slices were then  
218 washed 2x10 min with wash buffer, 2x10 min with PBS and 1x10 min in 5 mM phosphate buffer, and  
219 finally mounted with a drop of fluorescence mounting medium based on Mowiol 4-88 (Carl Roth,  
220 Karlsruhe, Germany) and covered with a thin glass coverslip. The above described perfusion fixation  
221 method was used to stain for RIM-BP2 (Figure 4 A, B). The remaining immunofluorescence

222 experiments (Munc13-1, RIM2, CAST, bassoon) were done on samples taken from RIM-BP2 KO mice  
223 aged between p15 – p23 and WT littermates. After obtaining coronal sections from the cryostat the  
224 slices were maintained frozen at -20°C until immersion fixation or fixed directly on ice in a solution of  
225 PBS containing 3% w/v heat depolymerized PFA (70°C) for 3 minutes. This alternative method of  
226 fixation showed robust labelling with less background than perfusion fixed samples labelled against  
227 the same markers. For the comparison of Cav2.1 immunofluorescence levels in confocal microscopy  
228 and the STED analysis of Cav2.1 and bassoon clusters, we used very brief fixation with 3% PFA for less  
229 than one minute (30-40 seconds) as Cav<sub>v</sub>2.1 labelling was impeded by stronger fixation. Thereafter,  
230 the blocking and immunolabelling protocols were followed exactly as described above for the  
231 perfusion fixed samples.

232 Primary antibodies used were: rabbit anti-RIM-BP2 (1:200), guinea pig anti-VGLUT1 (1:500), rabbit  
233 anti-VGLUT1 (1:1000), mouse anti-gephyrin (1:500), mouse anti-Sap7f407 to bassoon (1:500; Abcam,  
234 Cambridge, UK), guinea pig anti-bassoon (1:500), rabbit anti-Munc13-1 (1:200), rabbit anti-RIM1  
235 (1:200), rabbit anti-RIM2 (1:200), rabbit anti-CAST (1:200), rabbit anti-P/Q Ca<sup>2+</sup> channel (1:500),  
236 chicken anti homer1 (1:200). Unless stated otherwise, primary antibodies were purchased from  
237 Synaptic Systems, Göttingen, Germany. Secondary antibodies used were: AlexaFluor488-,  
238 AlexaFluor568- and AlexaFluor647-labeled antibodies (1:200, Invitrogen), goat anti-guinea pig  
239 STAR580 and goat anti-rabbit STAR 635p (1:200, Abberior GmbH, Goettingen, Germany).

240 Confocal images were acquired using a laser-scanning confocal microscope (Leica TCS SP5; Leica  
241 Microsystems) equipped with 488 nm (Ar) and 561/633 nm (He-Ne) lasers and 63x/1.4 NA oil-  
242 immersion objective. STED and confocal images (Cav<sub>v</sub>2.1 and bassoon analyses) were acquired using  
243 a 2-color STED microscope (Abberior Instruments, Göttingen, Germany) equipped with 561 and 640  
244 nm excitation lasers, a 775 nm laser for STED (1.2W) and a 100x oil immersion objective (1.4NA,

245 Olympus). Confocal z-stacks were processed with Imaris (Bit-plane, Zurich, Switzerland) for spot  
246 detection, co-localization analysis and fluorescence intensity calculation using custom Matlab scripts.  
247 STED images of Cav2.1 and bassoon were analyzed using Igor Pro7 (Wavemetrics, Lake Oswego, OR,  
248 USA). Samples of both genotypes: RIM-BP2 WT and RIM-BP2 KO were processed and imaged in  
249 parallel, using same laser power, gain and microscope settings.

#### 250 **SDS – Freeze-fracture Replica Immuno-Labeling (SDS-FRIL)**

251 Mice at postnatal day 20-24 were deeply and terminally anesthetized with Xylazin (5 mg/kg) and  
252 Ketamin (10 mg/ml) in 0.9% saline, and perfused transcardially with ice-cold PBS followed by  
253 perfusion with freshly-prepared 2% PFA with 15% saturated picric acid solution in 0.1 M phosphate  
254 buffer (PB) with pH adjusted to 7.3. The fixed brain was then removed and brainstem was dissected  
255 with a coronal cut few millimetres nasal to the junction between occipital cortex and cerebellum. The  
256 brain block was washed over night in 30% sucrose solution in PBS. Coronal slices (130  $\mu$ m thick) were  
257 cut from the fixed brain block fusing a vibratome microslicer (Linear-Pro7, Dosaka) in ice-cold PBS.  
258 The rostral anterior ventral cochlear nuclei were trimmed by hand from the slices. The trimmed  
259 sections were then immersed in graded glycerol concentrations of 10%-20% at room temperature for  
260 20 min each, followed by 30% at 4°C overnight. The trimmed sections were sandwiched between two  
261 metal carriers and then rapidly frozen by a high-pressure freezing machine (HPM010, BAL-TEC,  
262 Balzers). Using a freeze etching device (BAF060, BAL-TEC), frozen samples were then fractured into  
263 two parts at -115°C, and the fractured faces were replicated by sequential deposition of carbon  
264 (thickness: 5 nm from 90° angle), platinum (thickness: 2 nm from 60° angle, unidirectional), and  
265 carbon again (thickness: 20 nm from 90° angle). After thawing, the tissue debris attached to the  
266 replica was digested with gentle shaking at 80°C for 18 h, in a solution containing 2.5 % SDS, 20%

267 sucrose, and 15 mM of Tris-HCl with pH set to 8.3. The replicas were washed 3 x 10 min in wash buffer  
268 (0.1% Tween-20, 0.05% BSA, 0.05% NaN<sub>3</sub> in TBS, pH 7.4), and then the non-specific binding sites were  
269 blocked with 5% BSA in wash buffer for 1 h at 4°C.

270 For multiple immunolabelling against Cav2.1 and AZ proteins, replicas were first incubated with  
271 guinea pig anti-Cav2.1 antibody (8 µg/ml in 1% BSA; Frontier Institute AB\_2571851) at 15°C for 3 days,  
272 then with anti-guinea pig secondary antibodies conjugated with 10 nm gold particles (1:30 diluted in  
273 5% BSA; British Biocell International) at 15°C overnight, followed by incubation with a cocktail of  
274 rabbit anti-AZ proteins antibodies (anti-ELKS at 2 µg/ml in 1% BSA; gift from Prof. Ohtsuka raised  
275 against rat ELKS aa117-142, anti-Neurexin at 4 µg/ml in 1% BSA; gift from Prof. Watanabe raised  
276 against aa1499-1507 and anti-RIM at 4 µg/ml in 1% BSA; Synaptic Systems 140203 ) at 15°C overnight,  
277 and finally with anti-rabbit secondary antibodies conjugated with 5 nm gold particles (1:30 diluted in  
278 5% BSA; British Biocell International) at 15°C overnight. After immunolabelling, replicas were rinsed  
279 three times with 0.05% BSA in TBS, washed with TBS and distilled water, and mounted on formvar-  
280 coated copper grids.

281 The labelled replicas were imaged using a Tecnai-12 transmission electron microscope (FEI; AV 120  
282 kV). To obtain a planar view for quantitative measurement of immuno-gold particle number and  
283 densities, profile of synaptic structures (AZ and PSD) were tilted in the electron beam. IMP clusters  
284 representing PSDs were manually demarcated and the area was measured using ImageJ software  
285 (Rubio et al., 2017). Active zone areas were marked by hand with the experimenter being blinded to  
286 the identity of the two genotypes. Quantitative analysis of immune-gold particles was done using an  
287 in-house software tool – Gold Particle Detection and Quantification (Luján et al., 2018). To define  
288 clusters of gold particles the threshold for the distance between particles belonging to the same  
289 cluster was calculated as  $\mu + 2\sigma$ , where  $\mu$  and  $\sigma$  are the mean and standard deviation obtained from

290 a Gaussian fit to the distribution of nearest neighbour distances (NND) between particles.  $\mu + 2\sigma$  was  
291 43.02 nm and 43.92 nm for Ca<sub>v</sub>2.1 gold particles in RIM-BP2 WT and KO respectively. We set the  
292 threshold at 40 nm to match the value used in a previous analysis (Miki et al., 2017). The distances  
293 between particles were measured from their centers of mass, and the minimum number of particles  
294 required to form a cluster was set to three. We additionally compared our ‘real’ distribution of NNDs  
295 between gold particles and their clustering to 500 random and fitted simulations (keeping the NNDs  
296 between the simulated particles similar to the ones between the ‘real’ gold particles) generated by  
297 Monte-Carlo simulations (as described in (Luján et al., 2018; Kleindienst et al., 2020)) to confirm that  
298 the clusters visualized through our analysis are not generated by chance.

### 299 **High-pressure freezing, Freeze substitution and Electron tomography**

300 Parasagittal slices from cochlear nuclei were obtained as described for slice electrophysiology. Slices  
301 containing the cochlear nucleus were trimmed and mounted onto type A specimen carriers (Leica  
302 Microsystems, Wetzlar, Germany) filled with cutting solution. The flat side of the type B carriers (Leica  
303 Microsystems, Wetzlar, Germany) was dipped in 1-hexadecene (Sigma-Aldrich, Wetzlar, Germany)  
304 and placed onto the type A carriers. Samples were frozen immediately using a HPM100 (Leica  
305 Microsystems, Wetzlar, Germany) and transferred into liquid nitrogen. Freeze-substitution was  
306 performed in an EM AFS2 (Leica Microsystems, Wetzlar, Germany) according to Wong *et al.* (Wong  
307 et al., 2014). The slices were incubated in 0.1% (w/v) tannic acid in acetone at  $-90^{\circ}\text{C}$  for 4 days and  
308 afterward washed three times for 1 h each in acetone at  $-90^{\circ}\text{C}$ . 2% (w/v) osmium tetroxide in acetone  
309 was applied and incubated for 40.4 h. During that time the temperature was raised slowly to  $4^{\circ}\text{C}$   
310 ( $10^{\circ}\text{C}/\text{h}$ ). At  $4^{\circ}\text{C}$ , osmium tetroxide was removed, and the samples were washed with acetone three  
311 times and brought to room temperature. Slices were infiltrated in epoxy resin (Agar-100 kit, Plano,

312 Germany; epoxy/acetone 1:1 3-6 h; 100% epoxy overnight). Finally, samples were further incubated  
313 in fresh 100% epoxy and placed in embedding molds.

314 After polymerization for 48 h at 70°C, excess resin was removed with a fine file (DiAtome, Switzerland)  
315 and the block was trimmed to a pyramid using a razor blade. To check the region and the structural  
316 preservation, 65 nm ultrathin sections were cut with a diamond knife (DiAtome, Switzerland) using  
317 an EM UC7 (Leica Microsystems, Wetzlar, Germany) ultramicrotome. Sections were collected on  
318 formvar-coated copper slot grids (Athene, Plano, Wetzlar, Germany, for ultrathin sections). For  
319 electron tomography, 250 nm semi-thin sections were obtained and collected on mesh grids (100  
320 mesh; Athene, Plano, Wetzlar, Germany, for semi-thin sections). Post-staining was performed with  
321 Uranylless (EMS, Hatfield, PA) for 20 min.

322 The region and quality of the tissue was checked at 80 kV using a JEM1011 transmission electron  
323 microscope (JEOL, Freising, Germany) equipped with a GatanOrius 1200A camera (Gatan, Munich,  
324 Germany). Electron tomography was performed as described previously (Wong et al., 2014). 10 nm  
325 gold beads (British Bio Cell/Plano, Germany) were applied to both sides of the stained grids. Big  
326 synaptic terminals on bushy cells were identified and tilt series from endbulb AZs were acquired at  
327 200 kV using a JEM2100 transmission electron microscope (JEOL, Freising, Germany) mostly from  
328 -60° to +60° with a 1° increment at 15,000× using the Serial-EM software package with an image pixel  
329 size of 0.95 nm (Mastronarde, 2005). Tomograms were generated using the IMOD package etomo  
330 (Kremer et al., 1996).

331 Only asymmetric synapses with clearly identifiable PSDs were analyzed. However, in high-pressure  
332 frozen samples, PSDs appear less electron-dense compared to chemical fixed synapses. Only AZs that  
333 showed a PSD and a clear synaptic cleft, originating from large presynaptic terminals were analyzed  
334 to exclude inhibitory synapses.



335 Tomograms were segmented semi-automatically using 3dmod (Kremer et al., 1996). The AZ  
336 membrane was manually segmented every 15 virtual sections for five consecutive virtual sections  
337 and then interpolated across the Z-stack, following the extent of the PSD and the parallel synaptic  
338 cleft. Moreover, virtual sections were corrected manually after interpolation. The total surface area  
339 of this object was then divided by two to calculate the AZ area.

340 Synaptic vesicles (SVs) were reconstructed at their maximum projection and the sphere size was  
341 adjusted for each vesicle. The smallest distances from the outer leaflet of the SV membrane to the  
342 inner leaflet of the AZ membrane were measured and SVs in contact with the AZ membrane were  
343 defined as morphological docked SVs (0-2 nm distance). Moreover, all vesicles within 200 nm of the  
344 AZ were quantified and categorized in 20 nm bins. The radii of the SVs were determined with the  
345 program “imodinfo” of the IMOD software package and the diameters were calculated. For  
346 quantification of lateral distances of docked SVs, models of tomogram top-views with docked SVs  
347 were imported in ImageJ and the center of the captured AZ area was defined by setting two diagonal  
348 lines from respective edges of the AZ. The crossing point was defined as the center and the distances  
349 were measured from the outer membrane of the SV towards the center point.

350

### 351 **Data analysis**

352 Electrophysiology data were analyzed using Igor Pro (Wavemetrics, Lake Oswego, OR, USA), Mini  
353 Analysis (Synaptosoft Inc., Fort Lee, NJ, USA) and GraphPad Prism software (La Jolla, CA, USA).  
354 Synaptic delay was calculated as the time between the start of stimulus (voltage output of the  
355 amplifier as dictated by the experiment protocol) and the time when the respective EPSC response  
356 reached 10% of its peak amplitude.

357 Confocal images were analyzed using ImageJ software, Imaris (Bitplane AG, Zurich, Switzerland) and  
358 Matlab (Mathworks). STED images of Cav2.1 channels were analysed using custom Igor pro scripts.  
359 Single plane slices of the top (coverslip proximal) and/or bottom (distal from coverslip) membranes  
360 of BCs were imaged to capture the Cav2.1 spots on a flat surface top view and enable 2D Gaussian  
361 fitting. The Cav2.1 spots that were simultaneously closely juxtaposed to puncta of both homer1 and  
362 bassoon were fitted with Igor Pro's 2D Gaussian function. Figures were assembled for display using  
363 Adobe Illustrator (Adobe Systems, Munich, Germany). Unless reported otherwise, statistical  
364 significance between groups was determined by either unpaired Student's t-test (in case of normally  
365 distributed data with comparable variances between the groups) or Wilcoxon rank sum test (when  
366 data distribution did not satisfy the criteria). Normality of distribution was tested with Jarque-Bera  
367 test and variances were compared with F-test. Data were presented as mean  $\pm$  S.E.M. when  
368 compared using Student's t-test. In case of Wilcoxon's rank sum test, data were presented as box and  
369 whisker plots showing grand median (of the means of all recordings), lower/upper quartiles, 10-90<sup>th</sup>  
370 percentiles). \*, \*\*, \*\*\*, \*\*\*\* indicate  $p < 0.05$ , 0.01, 0.001 and 0.0001 respectively.

371 **Results**

372 **Deletion of RIM-BP2 impairs synchronous transmitter release at the endbulb of Held synapse**

373 To determine the functional role of RIM-BP2, we studied synaptic transmission at the endbulb of Held  
374 synapse in acute parasagittal slices of the brainstem of constitutive RIM-BP2 knockout mice (RIM-BP2  
375 KO, (Grauel et al., 2016)) recording spontaneous (no stimulation, no TTX applied) and evoked  
376 excitatory postsynaptic currents (sEPSCs and eEPSCs, respectively) from bushy cells (BCs) of the  
377 anteroventral cochlear nucleus (aVCN, Fig. 1A) at postnatal days 15-21. eEPSCs were elicited by  
378 minimal electrical stimulation of the presynaptic ANF by a monopolar electrode placed in the  
379 proximity (~3 cell diameters away) of the recorded BC, whereby each stimulus is aimed to elicit one  
380 action potential in one endbulb (Yang and Xu-Friedman, 2008).

381 Experiments of Figure 1 were performed in the presence of 1 mM kynurenic acid and 100  $\mu$ M  
382 Cyclothiazide (CTZ) to avoid saturation and desensitization of AMPA receptors (Chanda and Xu-  
383 Friedman, 2010), respectively. The concentration of CTZ used here, was adopted from previous  
384 reports at the calyx of Held (Sakaba and Neher, 2001; Thanawala and Regehr, 2013). The former study  
385 (Sakaba & Neher, 2001) examined the NMDA current in the presence of 100  $\mu$ M CTZ and found no  
386 evidence for a presynaptic CTZ effect at the calyx of Held. The eEPSC amplitude was reduced in RIM-  
387 BP2 KO BCs as compared to littermate wildtype (WT, Fig. 1B-C,  $3.50 \pm 0.37$  nA (KO) vs.  $5.48 \pm 0.73$  nA  
388 (WT),  $p = 0.022$ , Mann-Whitney U-test). There was a tendency towards slower eEPSC kinetics, but this  
389 did not reach significance for either synaptic delay (Fig. 1D) or rise and decay time (Fig. 1E-G), ( $p$ -value  
390  $\geq 0.05$ , Mann-Whitney U-test). EPSC recordings in the absence of kynurenic acid and CTZ (Fig. 1-1)  
391 confirmed the eEPSC reduction, eliminating the possibility of CTZ obscuring the changes in AMPA  
392 receptor composition or inducing membrane potential changes. The eEPSC kinetics was significantly  
393 slower for RIM-BP2 KO BCs under these conditions (Fig. 1-1).

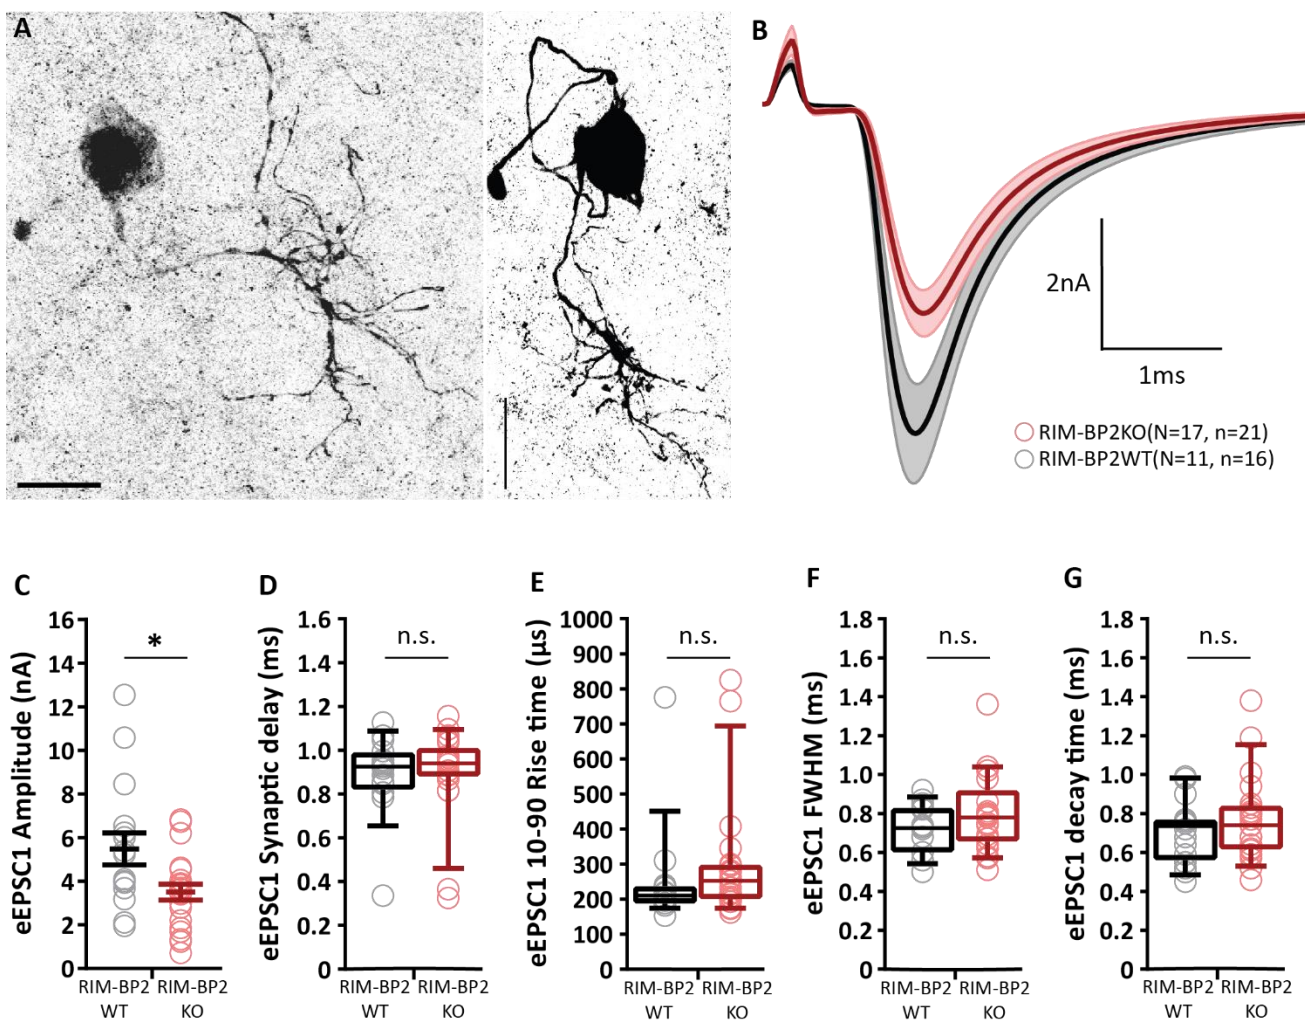

394

395 **Figure 1. Reduced amplitude of evoked EPSCs in RIM-BP2 deficient endbulb synapses.**

396 (A) BCs (left and right panels showing dye-filled BCs) were distinguished from stellate cells (another  
397 major cell type in the aVCN) by the faster kinetics of their postsynaptic currents (Isaacson and  
398 Walmsley, 1995) and their characteristic short-term plasticity (Chanda and Xu-Friedman, 2010). In  
399 addition to such functional identification, each recorded cell was filled with fluorescent dye Alexa 488  
400 via the patch pipette for morphological distinction. BCs are spherical in appearance with one primary  
401 dendrite terminating in a dense bush-like dendritic tree (Wu and Oertel, 1984), distinct from stellate  
402 cells, which are asymmetrical in shape and have multiple dendrites branching off in various directions  
403 giving them a star-like appearance. Scale bars: 20  $\mu\text{m}$ . (B) Average traces ( $\pm$  SEM) of eEPSCs in RIM-  
404 BP2 KO (red) and WT (black) endbulbs. (C) Reduced eEPSC amplitude in RIM-BP2 KO compared to WT.  
405 (D-G) No significant differences in eEPSC kinetics: (D) synaptic delay, (E) 10-90% rise time, (F) full  
406 width at half-maximum and (G) decay time. Data points represent the mean estimate of each BC  
407 included in the analysis. Normality was tested with the Jarque-Bera test. Normally distributed data  
408 (C) are shown as grand mean (of the means of all BCs)  $\pm$  SEM. Non-normally distributed data (D, E, F,  
409 G) are presented as box and whisker plots (grand median of all BC means, lower/upper quartiles, 10-  
410 90<sup>th</sup> percentiles); n.s.  $p$ -value  $\geq 0.05$ , Mann-Whitney U-test.  $N$ : number of animals,  $n$ : number of BCs.  
411

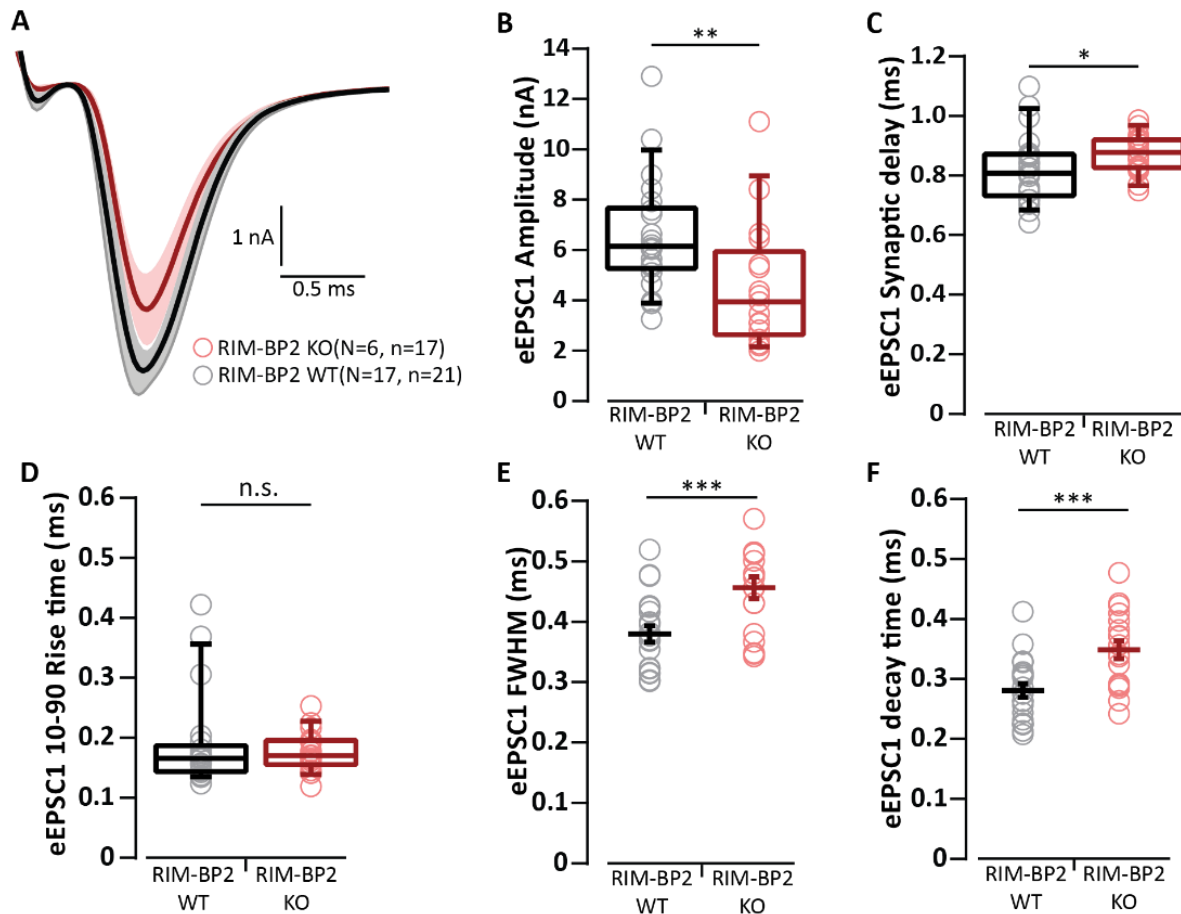

412  
413

**Figure 1-1. Evoked EPSC recordings in the absence of kynurenic acid and CTZ**

414 (A) Average traces ( $\pm$  SEM) of eEPSCs in RIM-BP2-KO (red) endbulbs and WT (black) in the absence of  
 415 kynurenic acid and CTZ. (B) Reduced eEPSC amplitude in RIM-BP2 KO compared to in WT. (C-F) eEPSC  
 416 kinetics: (C) a larger synaptic delay, (D) unchanged 10-90% rise time, (E) wider full-width at half-  
 417 maximum, and (F) slower decay time. Data points represent the mean estimate of each BC included  
 418 in the analysis. Normality was tested with the Jarque-Bera test. Normally distributed data (E, F) are  
 419 shown as grand mean (of the means of all BCs)  $\pm$  SEM, and significance was tested with Student's t-  
 420 test. Non-normally distributed data (B, C, D) are presented as box and whisker plots (grand median  
 421 of all BC means, lower/upper quartiles, 10-90<sup>th</sup> percentiles), and significance was tested with Mann-  
 422 Whitney U-test; n.s.  $p$ -value  $\geq 0.05$ , \*  $p$ -value  $< 0.05$ , \*\*  $p$ -value  $< 0.01$ , \*\*\*  $p$ -value  $< 0.001$ .  $N$ : number  
 423 of animals,  $n$ : number of BCs.

424 In order to test for potential changes in the quantal release properties we recorded spontaneous  
 425 EPSCs (sEPSCs) from BCs (Fig. 1-2). We did not observe differences in the sEPSC amplitude (Fig. 1-2A-  
 426 C), kinetics (Fig. 1-2D-F) and frequency (Fig. 1-2G;  $p$ -value  $\geq 0.05$  for all 3 quantities), which was also  
 427 the case when recording in the absence of kynurenic acid and CTZ (Table 1). Unaltered sEPSCs suggest

428 that the properties of single SV release and of postsynaptic glutamate response are intact in RIM-BP2  
 429 deficient endbulb synapses at BCs.

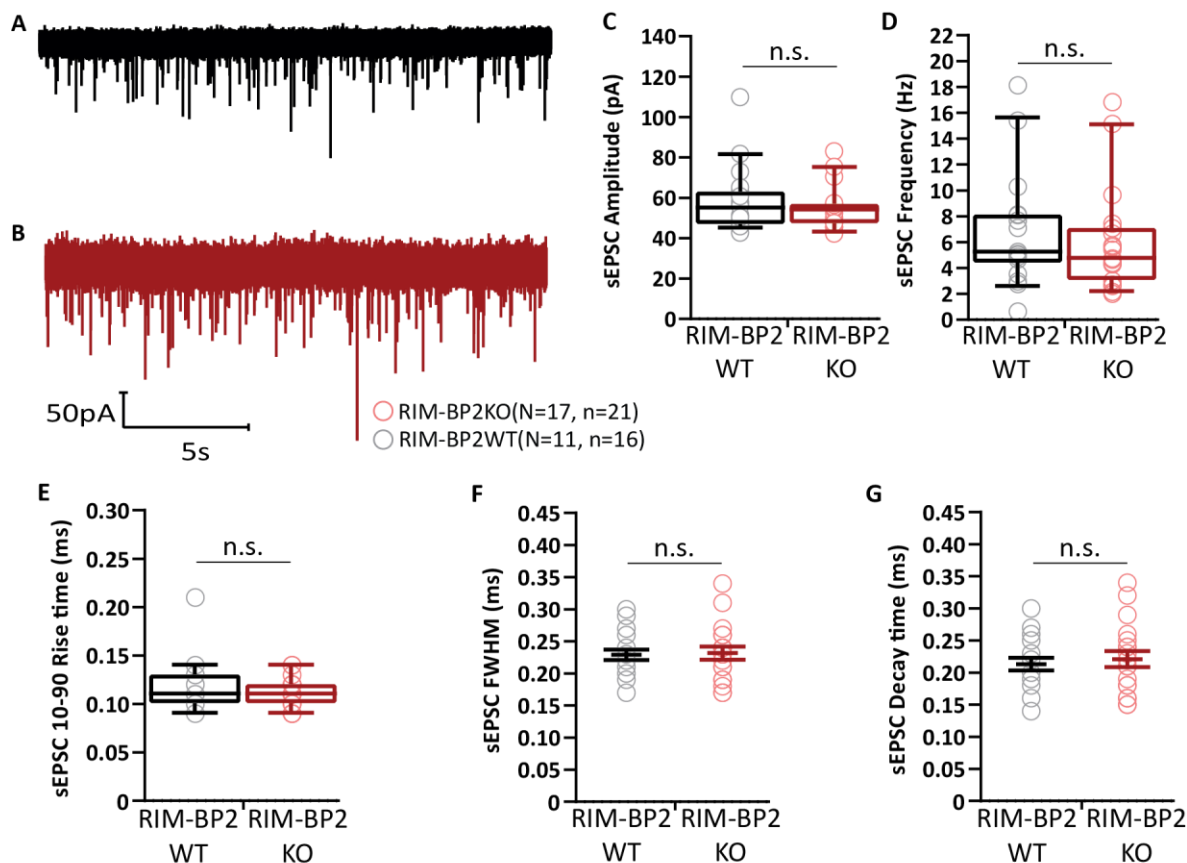

430

431 **Figure 1-2. Unaltered amplitude, kinetics and frequency of spontaneous EPSCs in RIM-BP2 deficient**  
 432 **endbulb synapses**

433 (A, B) Representative sEPSCs at WT (A, black) and RIM-BP2 KO (B, red) endbulbs of held: continuous  
 434 traces are shown. No significant differences in (C) amplitude, (D) frequency, (E) 10-90% rise time, (F)  
 435 full-width at half-maxima and (G) decay time in RIM-BP2 deficient endbulbs. sEPSC were recorded  
 436 while intracellularly blocking BC action potential generation with QX-314. Each data point represents  
 437 the mean estimate of each BC included in the analysis. Normality was tested with the Jarque-Bera  
 438 test. Normally distributed data are depicted as mean (grand average of all BC means)  $\pm$  SEM (F, G; n.s.  
 439  $p$ -value  $\geq 0.05$ , unpaired Student's t-test). Non-normally distributed data are presented as box and  
 440 whisker plots (grand median of all BC means, lower/upper quartiles, 10-90<sup>th</sup> percentiles) (C, D, E); n.s.  
 441  $p$ -value  $\geq 0.05$ , Mann-Whitney U-test  $N$ : number of animals,  $n$ : number of BCs.  
 442

| Parameter             | WT                 | RIM-BP2 KO        | p-value |
|-----------------------|--------------------|-------------------|---------|
| Amplitude (pA)        | 130.54 $\pm$ 12.06 | 112.48 $\pm$ 4.03 | 0.22    |
| 10-90% Rise time (ms) | 0.09 $\pm$ 0.003   | 0.09 $\pm$ 0.002  | 0.85    |
| FWHM (ms)             | 0.18 $\pm$ 0.008   | 0.19 $\pm$ 0.004  | 0.46    |
| Decay time (ms)       | 0.16 $\pm$ 0.010   | 0.17 $\pm$ 0.005  | 0.36    |
| Frequency (Hz)        | 7.65 $\pm$ 1.28    | 8.01 $\pm$ 1.09   | 0.83    |

443 **Table 1. Unaltered sEPSC at the RIM-BP2 deficient endbulb of Held in the absence of kynurenic acid**  
444 **and CTZ**

445 Data presented as mean (grand average of the means of all BCs)  $\pm$  S.E.M. Statistical significance  
446 between groups was determined by either unpaired Student's t-test (in case of normally distributed  
447 data with comparable variances between the groups) or Mann-Whitney U-test (when data  
448 distribution did not satisfy the criteria). Normality of distribution was tested with Jarque-Bera test  
449 and variances were compared with F-test. WT N = 4; n = 10, RIM-BP2 KO N = 7; n = 19 (N, number of  
450 animals; n, number of BCs).

451 Quantal size being unaltered, the reduced eEPSC alteration could result from either: (i) an impaired  
452 stimulus-secretion coupling due to reduced  $\text{Ca}^{2+}$  influx and/or altered topography of  $\text{Ca}^{2+}$  channels  
453 (Krinner et al., 2017) and fusion competent SVs (Acuna et al., 2015; Grauel et al., 2016; Luo et al.,  
454 2017), or (ii) due to an impaired SV priming that has recently been shown to involve RIM-BP2  
455 interaction with Munc13-1 (Brockmann 2020). We first checked for changes in presynaptic  $\text{Ca}^{2+}$  influx  
456 in the absence of RIM-BP2 using ruptured-patch recordings from the endbulb of Held (Lin et al., 2011)  
457 in mice after the hearing onset (postnatal days 13-16, Fig. 2). We did not observe significant changes  
458 in the peak  $\text{Ca}^{2+}$  current amplitude or peak  $\text{Ca}^{2+}$  current density in KO endbulbs of Held (Fig. 2).

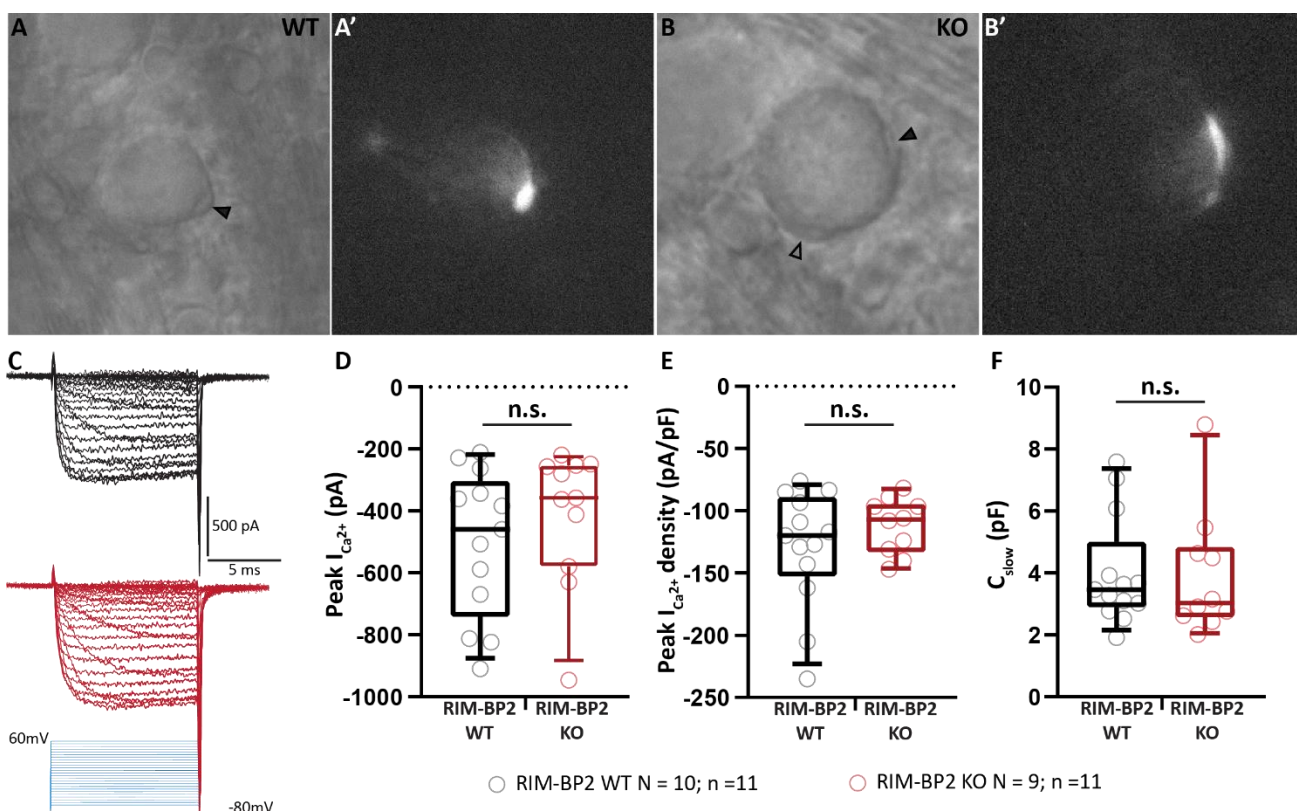

459

460 **Figure 2. Ca<sup>2+</sup> influx is unaltered in RIM-BP2 deficient endbulbs.**

461 (A, B) Bright-field images of the WT (A) and RIM-BP2 KO (B) bushy cells under DIC. The recorded  
462 endbulb is demarcated by a solid black arrow head (A, B), while another endbulb onto to the same  
463 bushy cell is shown by an open black arrowhead (B). Each recorded endbulb was filled with Alexa 488  
464 to confirm that only the presynaptic terminal was accessed, and not the postsynaptic cell. Fluorescent  
465 endbulbs are shown in A', B'. (C) Representative traces of presynaptic Ca<sup>2+</sup> currents in WT (black) and  
466 RIM-BP2 KO (red) in response to stepped increase in holding potential (stimulus protocol in blue). (D-  
467 F) No significant difference was observed between the two genotypes in the peak Ca<sup>2+</sup> current (D),  
468 peak Ca<sup>2+</sup> density (E; peak current/C<sub>slow</sub>), and the size of the endbulb (F, estimated by C<sub>slow</sub>). Each data  
469 point represents the mean estimate of each endbulb included in the analysis. Normality was tested  
470 with the Shapiro-Wilk test. Non-normally distributed data are presented as box and whisker plots  
471 (grand median of all BC means, lower/upper quartiles, 10-90<sup>th</sup> percentiles); n.s. *p-value* ≥ 0.05, Mann-  
472 Whitney U-test *N*: number of animals, *n*: number of endbulbs of Held.

473  
474 Next, we investigated whether eEPSC alteration is caused by a reduction in release probability or  
475 altered vesicle pool dynamics. We used high frequency stimulation to assess short-term plasticity,  
476 release probability as well as the size and dynamics of the RRP during *quasi* physiological regimes of  
477 synaptic transmission. Fifty consecutive stimuli were delivered at 100, 200, and 333 Hz (Fig. 3: in the  
478 presence of 1 mM kynurenic acid and 100 μM CTZ; Fig. 3-1 in the absence of both drugs). Different  
479 from the prominent short-term depression typical for the endbulb of Held (Oleskevich and Walmsley,  
480 2002; Yang and Xu-Friedman, 2008), RIM-BP2 deficient endbulb synapses showed an initial facilitation  
481 followed by slower depression (Fig. 3, Table 2, Fig. 3-1). Facilitation was evident from the paired pulse  
482 ratio (PPR) > 1 in RIM-BP2 deficient endbulb synapses for all inter-stimulus intervals tested, while PPR  
483 was consistently ~ 0.8 in WT (Table 2). The extent of depression assessed as EPSC<sub>30-50</sub>/EPSC<sub>max</sub> (Fig. 3,  
484 Table 2, Fig. 3-1) tended to be less in RIM-BP2 deficient endbulb synapses without reaching statistical  
485 significance. Release probability (P<sub>r</sub>) as well as the size and dynamics of the RRP were estimated by  
486 applying two variants of the cumulative analysis to the EPSC trains (Fig. 3): Schneggenburger-Meyer-  
487 Neher (SMN) method (Schneggenburger et al., 1999) and Elmqvist & Quastel (EQ) method (Elmqvist  
488 and Quastel, 1965); for review see: (Neher, 2015). Both methods revealed a significant reduction of  
489 P<sub>r</sub> in RIM-BP2 KO synapses while RRP size and the replenishment rate were not significantly altered



490 (Table 2). In an attempt to address the question whether the reduced release probability reflects a  
491 smaller complement of high release probability SVs (“tightly docked” or “super-primed” SVs (Neher  
492 and Brose, 2018)) we followed a previously described analysis that found a reduction of SV super-  
493 primed SVs upon genetic deletion of all rab3 isoforms (Schlüter et al., 2006). We subtracted the  
494 quantal content of each RIM-BP2 KO response from the respective RIM-BP2 WT response during train  
495 stimulation (Fig. 3M-O). This analysis revealed the strongest difference between the two genotypes  
496 occurs at the beginning of the train, where the RIM-BP2 KO endbulbs release 30-40 SVs less than the  
497 RIM-BP2 WT, which is consistent with a reduction of high release probability (“super-primed”) SVs in  
498 the absence of RIM-BP2. The difference vanishes already after the first two eEPSCs, when the  
499 subtraction curves for 200 and 333 Hz actually cross the zero line, indicating that release from KO-  
500 synapses is actually slightly larger than that from WT. Possible reasons for this small difference include  
501 i) protracted release of low release probability SVs that could result from impaired Cav-release site  
502 coupling and ii) residual desensitization that is more prominent for RIM-BP2 WT synapses with larger  
503 eEPSCs (despite 100  $\mu$ M cyclothiazide and 1 mM kynurenic acid). During the steady state response to  
504 the train stimulation, the WT synapses tended to release more SVs than the KO (average difference:  
505 6 SVs for 100 Hz, 3 SVs for 200Hz, no difference for 333 Hz).

506

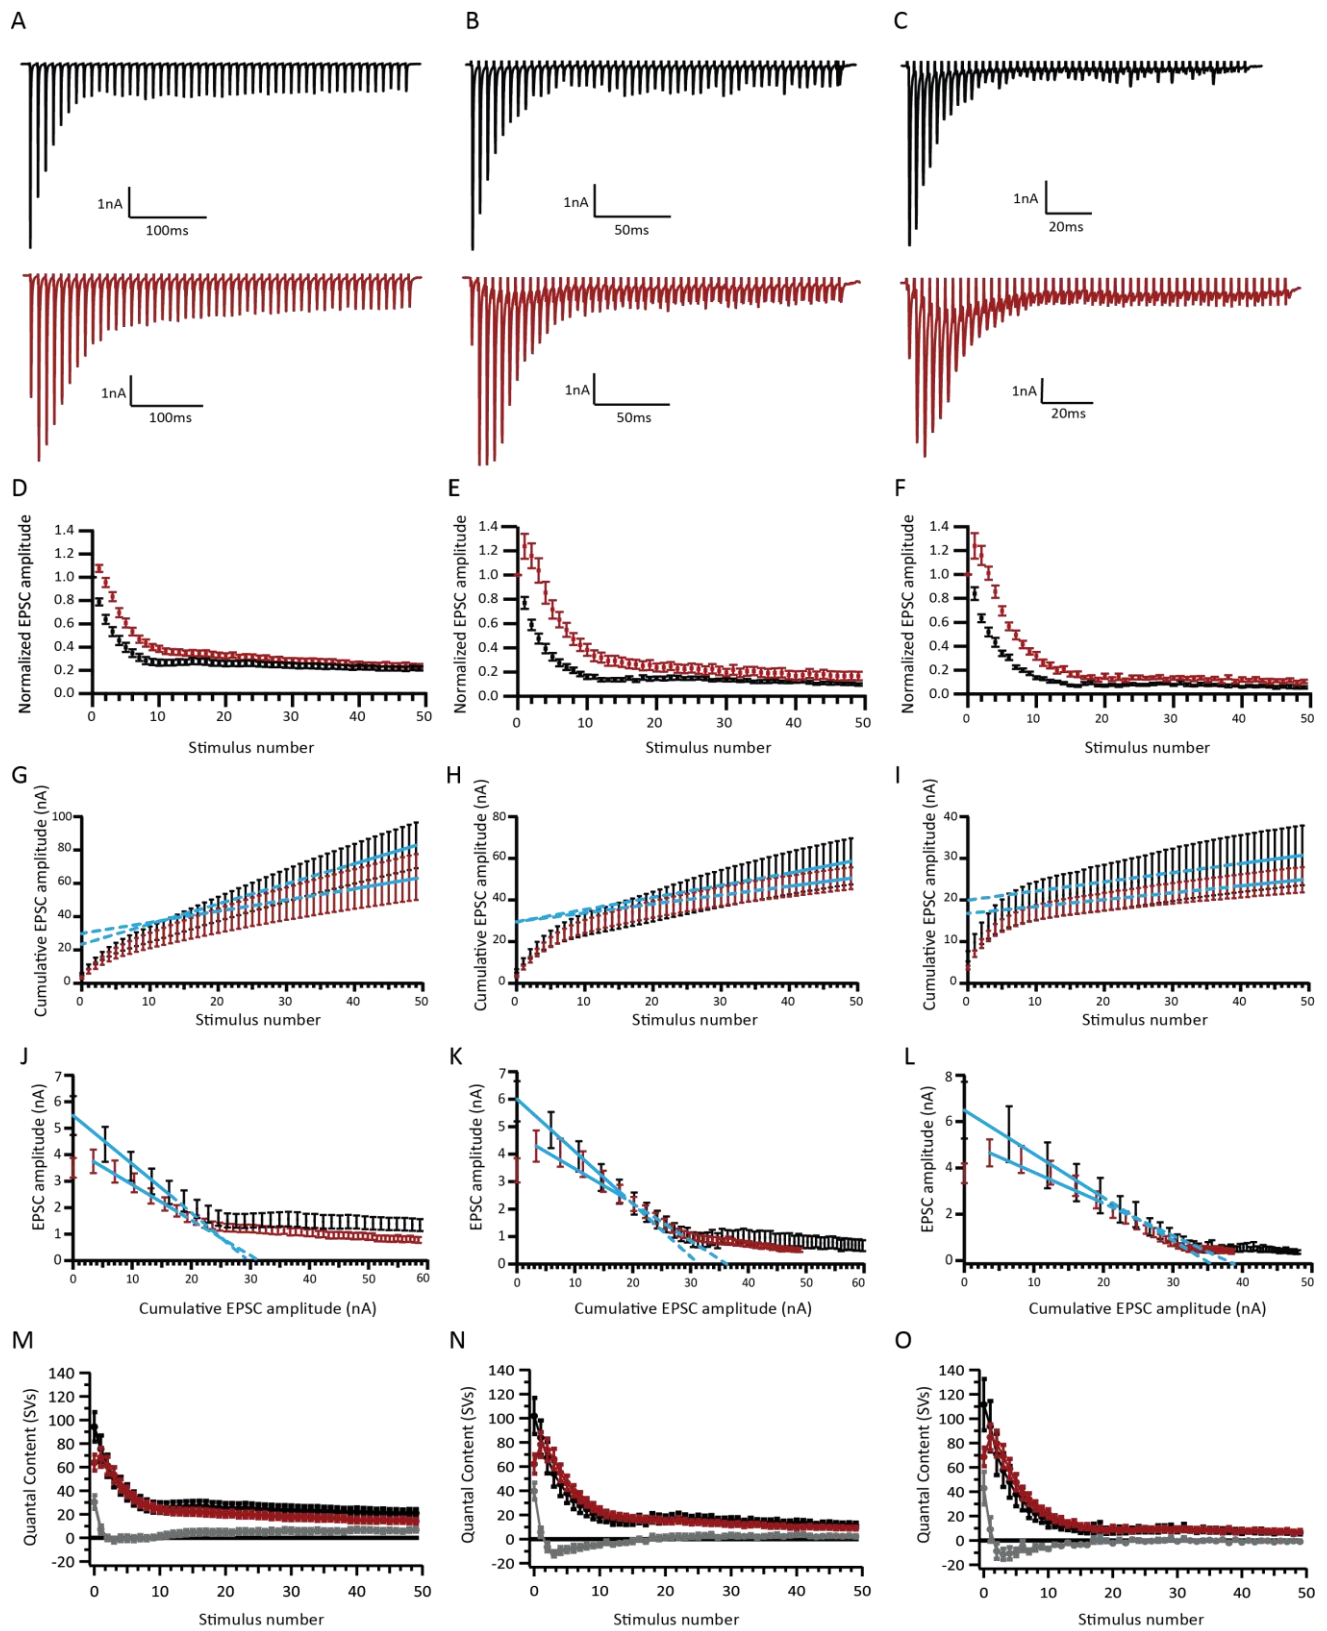

507

508 **Figure 3. Analysis of release probability ( $P_r$ ) as well as the size and dynamics of the RRP**

509 **(A-C)** Representative traces of eEPSCs in response to trains of 50 action potentials delivered at  
510 frequencies of 100 (A), 200 (B) and 333Hz (C) recorded from WT (top, black traces) and RIM-BP2 KO

511 (bottom, red traces). Note the characteristic fast short-term depression of WT bushy cell EPSCs that  
 512 is altered in the mutant. The mutant BCs show a delayed short-term depression with the first EPSC  
 513 amplitude not being the largest in the train, indicating that the naive mutant synapse releases most  
 514 of its vesicles later in the train. **(D, E, F)** Average EPSC amplitudes, normalized to the first EPSC of the  
 515 train plotted against the stimulus number. **(G-I)** To estimate the size of the readily releasable pool  
 516 (RRP), the rate of vesicle replenishment and the release probability ( $P_r$ ) using the Schneggenburger-  
 517 Meyer-Neher (SMN) method, the EPSC amplitudes of the 100 **(G)**, 200 **(H)** and 333Hz **(I)** trains were  
 518 plotted cumulatively against the stimulus number. The linear fit (solid blue line) to the last ten steady-  
 519 state values was extrapolated to the y-axis (dotted blue line). The y-intercept value, divided by the  
 520 average sEPSC amplitude yields the number of vesicles in the RRP. To calculate  $P_r$ , the vesicle content  
 521 of eEPSC1 is divided by the size of the RRP. The slope of the linear fit approximates the rate of vesicle  
 522 replenishment during the train. Quantitative analysis is further elaborated in Table 1. **(J-L)** To estimate  
 523 the RRP size and  $P_r$  using the Elmqvist and Quastel (EQ) method, absolute EPSC amplitudes were  
 524 plotted against the cumulative amplitude of all the EPSCs preceding the corresponding EPSC. The  
 525 linear fit to the first 3-5 points for the 100 **(J)**, 200 **(K)** and 333Hz **(L)** trains (solid blue line) was forward  
 526 extrapolated (dotted blue line) to the x-axis. Dividing the x-axis intercept value by the average sEPSC  
 527 size, yields the size of the RRP, while the slope of the linear fit defines the  $P_r$ . To assess whether the  
 528 reduced  $P_r$  results from fewer “super-primed” SVs in the RRP, a subtraction analysis was performed.  
 529 We first divided the average eEPSC amplitudes by the average sEPSC amplitude to calculate the SV  
 530 number released during each eEPSC (quantal content) of the averaged responses to 100, 200 and 333  
 531 Hz train stimulation. Traces plot the quantal content released during each one of 50 eEPSCs in 100  
 532 **(M)**, 200 **(N)** and 333Hz **(O)** trains against the stimulus number. After subtracting the quantal content  
 533 for each RIM-BP2 KO eEPSC from the respective WT eEPSC, we plot the subtraction curves (gray  
 534 curves at the bottom of each panel). For 100 Hz: RIM-BP2 WT N = 14; n = 16, RIM-BP2 KO N = 17; n =  
 535 21. For 200 Hz: RIM-BP2 WT N = 13; n = 16, RIM-BP2 KO N = 13; n = 16. For 333 Hz: RIM-BP2 WT N =  
 536 6; n = 12, RIM-BP2 KO N = 14; n = 17. N, number of animals; n, number of BCs.  
 537

| Stimulation Frequency | Parameter                       | RBP2 WT                  | RBP2 KO                 | p value              |
|-----------------------|---------------------------------|--------------------------|-------------------------|----------------------|
| 100Hz                 | eEPSC1 amplitude (nA)           | 5.48 ± 0.73 (4.7)        | 3.5 ± 0.37 (3.6)        | <b>0.022, M</b>      |
|                       | tau (ms)                        | 33.60 ± 3.64 (27.2)      | 56.95 ± 3.76 (58.03)    | <b>0.0001, T</b>     |
|                       | eEPSC <sub>30-50</sub> (nA)     | 1.29 ± 0.22 (1.09)       | 0.87 ± 0.12 (0.84)      | 0.1015, M            |
|                       | eEPSC <sub>30-50</sub> /EPSCmax | 0.23 ± 0.02 (0.21)       | 0.24 ± 0.03 (0.24)      | 0.8205, T            |
|                       | Replenishment                   | 2.09 ± 0.35 (1.79)       | 1.44 ± 0.20 (1.2)       | 0.1015, T            |
|                       | RRP <sub>SMN</sub> (SVs)        | 398.60 ± 72.50 (341.56)  | 455.61 ± 63.00 (446.32) | 0.4038, M            |
|                       | RRP <sub>EQ</sub> (SVs)         | 575.11 ± 102.11 (504.25) | 593.62 ± 73.45 (610.12) | 0.6826, M            |
|                       | $P_{r\text{SMN}}$               | 0.26 ± 0.02 (0.28)       | 0.17 ± 0.01 (0.15)      | <b>0.0004, T</b>     |
|                       | $P_{r\text{EQ}}$                | 0.2 ± 0.02 (0.21)        | 0.14 ± 0.01 (0.13)      | <b>0.0336, T</b>     |
| PPR                   | 0.79 ± 0.03 (0.72)              | 1.08 ± 0.10 (0.97)       | <b>0.0004, M</b>        |                      |
| 200Hz                 | tau (ms)                        | 33.05 ± 3.04 (32.46)     | 70.51 ± 5.85 (65.43)    | <b>&lt;0.0001, M</b> |
|                       | eEPSC <sub>30-50</sub> (nA)     | 0.76 ± 0.13 (0.70)       | 0.59 ± 0.07 (0.56)      | 0.0608, M            |
|                       | eEPSC <sub>30-50</sub> /EPSCmax | 0.13 ± 0.01 (0.14)       | 0.17 ± 0.03 (0.13)      | 0.0608, M            |
|                       | Replenishment                   | 2.16 ± 0.37 (1.98)       | 1.53 ± 0.24 (1.45)      | 0.1756, T            |

|              |                                             |                          |                         |                      |
|--------------|---------------------------------------------|--------------------------|-------------------------|----------------------|
|              | RRP <sub>SMN</sub> (SVs)                    | 479.11 ± 110.23 (351.27) | 544.42 ± 77.85 (545.76) | 0.3168, M            |
|              | RRP <sub>EQ</sub> (SVs)                     | 554.34 ± 123.03 (441.21) | 771.93 ± 108 (663.17)   | 0.0883, M            |
|              | P <sub>r SMN</sub>                          | 0.25 ± 0.02 (0.26)       | 0.14 ± 0.01 (0.13)      | <b>&lt;0.0001, M</b> |
|              | P <sub>r EQ</sub>                           | 0.22 ± 0.02 (0.20)       | 0.13 ± 0.01 (0.13)      | <b>0.0002, T</b>     |
|              | PPR                                         | 0.81 ± 0.05 (0.79)       | 1.28 ± 0.10 (1.21)      | <b>&lt;0.0001, M</b> |
| <b>333Hz</b> | tau (ms)                                    | 19.34 ± 2.50 (19.77)     | 39.97 ± 3.92 (40.97)    | <b>0.0002, T</b>     |
|              | eEPSC <sub>30-50</sub> (nA)                 | 0.45 ± 0.09 (0.38)       | 0.48 ± 0.08 (0.41)      | 0.1523, M            |
|              | eEPSC <sub>30-50</sub> /EPSC <sub>max</sub> | 0.07 ± 0.01 (0.07)       | 0.10 ± 0.02 (0.08)      | 0.6106, M            |
|              | Replenishment                               | 1.24 ± 0.21 (1.22)       | 1 ± 0.25 (0.89)         | 0.1656, M            |
|              | RRP <sub>SMN</sub> (SVs)                    | 345.21 ± 96.42 (253.09)  | 306.16 ± 36.91 (331.58) | 0.6471, M            |
|              | RRP <sub>EQ</sub> (SVs)                     | 595.52 ± 155.74 (450.19) | 674.17 ± 76.94 (787.59) | 0.2635, M            |
|              | P <sub>r SMN</sub>                          | 0.44 ± 0.06 (0.39)       | 0.25 ± 0.03 (0.22)      | <b>0.0043, T</b>     |
|              | P <sub>r EQ</sub>                           | 0.23 ± 0.03 (0.21)       | 0.15 ± 0.01 (0.15)      | <b>0.0022, T</b>     |
|              | PPR                                         | 0.8 ± 0.05 (0.84)        | 1.28 ± 0.11 (1.21)      | <b>0.0009, T</b>     |

538

539

540

541

542

543

544

545

546

547

548

549

550

551

**Table 2. Analysis of release probability (P<sub>r</sub>) as well as the size and dynamics of the RRP**

**Tau (τ):** time constant of single exponential fit to the decay of eEPSC amplitudes during the stimulation train. **eEPSC<sub>30-50</sub>/EPSC<sub>max</sub>:** average amplitude of the last 20 EPSCs (30-50) in the train, normalized to the amplitude of the largest EPSC amplitude of the train. **Replenishment:** rate of vesicle replenishment. **RRP:** readily releasable pool. **P<sub>r</sub>:** release probability. **PPR:** paired pulse ratio, amplitude of the second EPSC of the train normalized to the amplitude of the first EPSC. Data are presented as mean ± SEM and medians are shown in parentheses. Normality of data distribution was tested with Jarque-Bera test and the variances were compared with F-test. Statistical significance of differences was assessed with unpaired Student's t-test (shown in the table as T), when the data satisfied the criteria of normality and variance comparability. When the data did not satisfy these criteria, Mann-Whitney U-test was used instead (shown in the table as M). *p-value* < 0.05, set as threshold for statistical significance shown in bold.

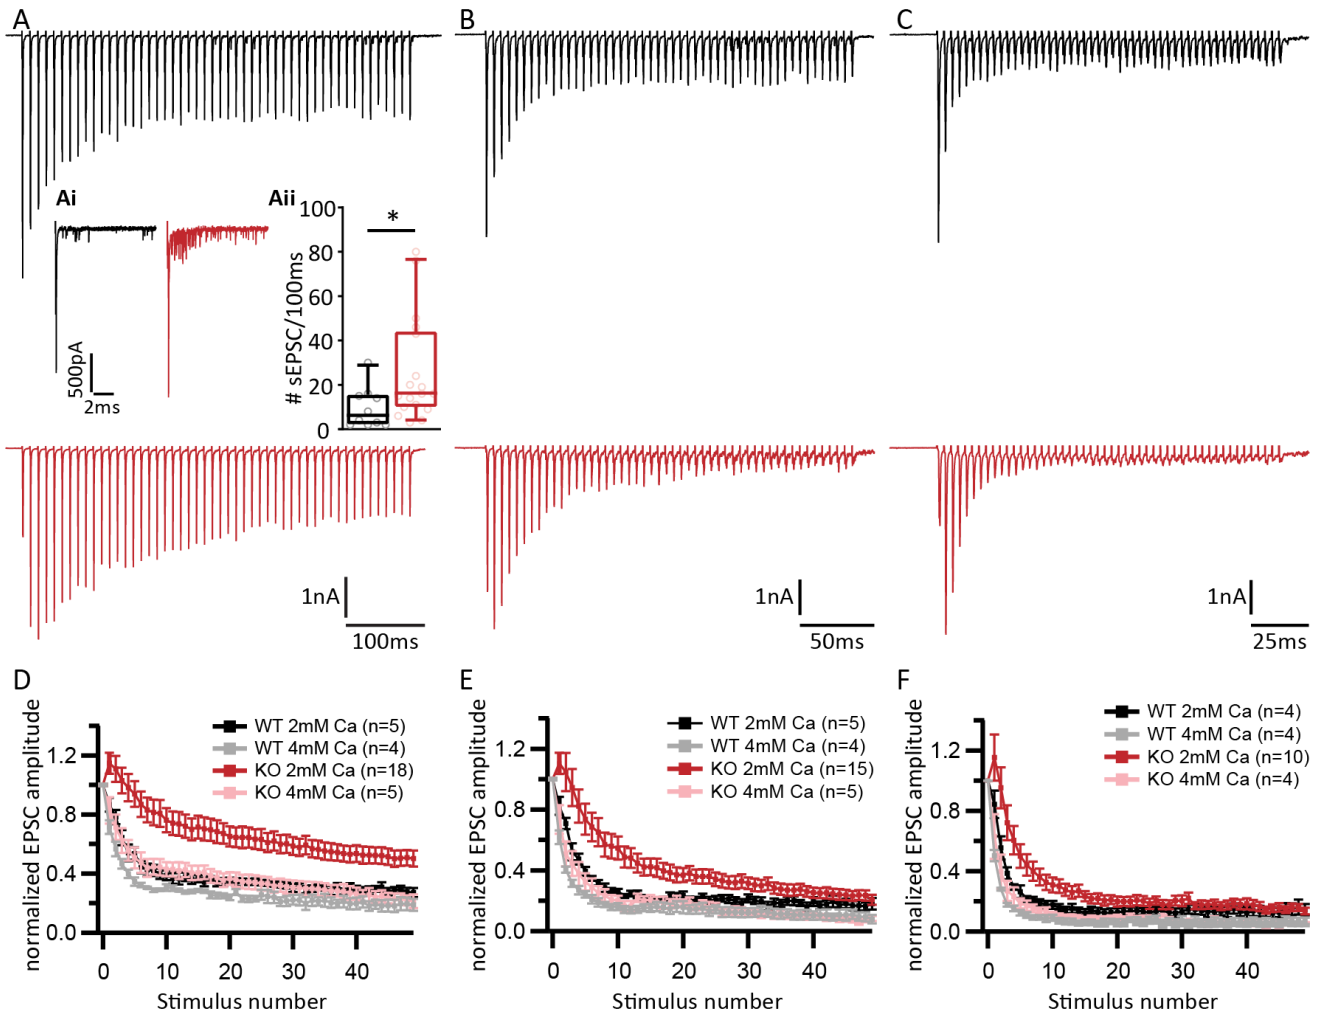

552

553 **Figure 3-1: Short-term depression replaced by facilitation at endbulbs of Held in RIM-BP2 KO mice**  
554 **in the absence of kynurenic acid and CTZ**

555 Representative traces of eEPSCs in response to trains of 50 action potentials delivered at frequencies  
556 of 100 (A), 200 (B) and 333Hz (C) recorded from WT (top, black traces) and RIM-BP2 KO (bottom, red  
557 traces). *Inset (Ai, Aii)*: Asynchronous release calculated as the number of spontaneous EPSC events  
558 (sEPSC) within 100 ms following the synchronous release elicited by a train of 50 pulses delivered at  
559 100Hz. A significantly higher asynchronous release was observed in the RIM-BP2 KO (red) as  
560 compared to the WT (black). Note the characteristic fast short-term depression of WT bushy cell  
561 EPSCs that is altered in the mutant. The mutant BCs show a delayed short-term depression with the  
562 first EPSC amplitude not being the largest in the train, indicating that the naive mutant synapse  
563 releases most of its vesicles later in the train. This effect is more pronounced in the higher frequencies  
564 of stimulation, as is demonstrated when the EPSC amplitudes, normalized to the first EPSC of the train  
565 are plotted against the stimulus number (D, E, F). This effect was abolished when extracellular  $\text{Ca}^{2+}$   
566 was increased to 4mM (WT traces in grey and KO traces in pink).

567

568 In order to further scrutinize RRP dynamics, we studied the recovery from short-term depression, by  
569 measuring eEPSC amplitudes elicited by single stimuli presented at varying time intervals after a  
570 conditioning 100 Hz train of 50 pulses (Fig. 4). Recovery is displayed as the eEPSC amplitudes  
571 normalized to the amplitude of the first eEPSC of the conditioning train (Fig. 4A-B): RIM-BP2 deficient  
572 endbulb synapses showed a major reduction of fast recovery. The time course was fitted with a  
573 double exponential function revealing the following amplitude and tau values for the fast and slow  
574 components of recovery:  $A_1 = 0.17 \pm 0.05$ ,  $\tau_1 = 123 \pm 97.6$  ms;  $A_2 = 0.69 \pm 0.06$ ,  $\tau_2 = 6.1 \pm 1.7$  s for RIM-  
575 BP2 KO and  $A_1 = 0.31 \pm 0.04$ ,  $\tau_1 = 96 \pm 30$  ms;  $A_2 = 0.4 \pm 0.04$ ,  $\tau_2 = 4.6 \pm 1.4$  s for WT.

576 Next, we evaluated the impact of the impaired synaptic transmission on processing of  
577 auditory information using juxtacellular recordings from putative spherical bushy cells (for simplicity  
578 referred to as “BCs”) *in vivo* (Fig. 5). Glass microelectrodes were stereotactically navigated to the aVCN  
579 from an occipital craniotomy, sound stimuli were presented in the open field, and BCs identified  
580 based on electrode position, first spike latency, regularity of firing and shape of the peristimulus spike  
581 time histogram (see Materials and Methods). The (non-significant) trend toward lower spontaneous  
582 firing rate (Fig. 5A, Table 3) is consistent with the reduced spontaneous ANF input (Krunner et al.,  
583 2017) and the trend toward a lower frequency of sEPSCs in RIM-BP2 KO BCs (Fig. 1-2). Sound  
584 threshold and frequency tuning were unaltered, whereby the RIM-BP2 KO data set contained more  
585 BCs with higher characteristic frequency (Fig. 5B-C, Table 3).

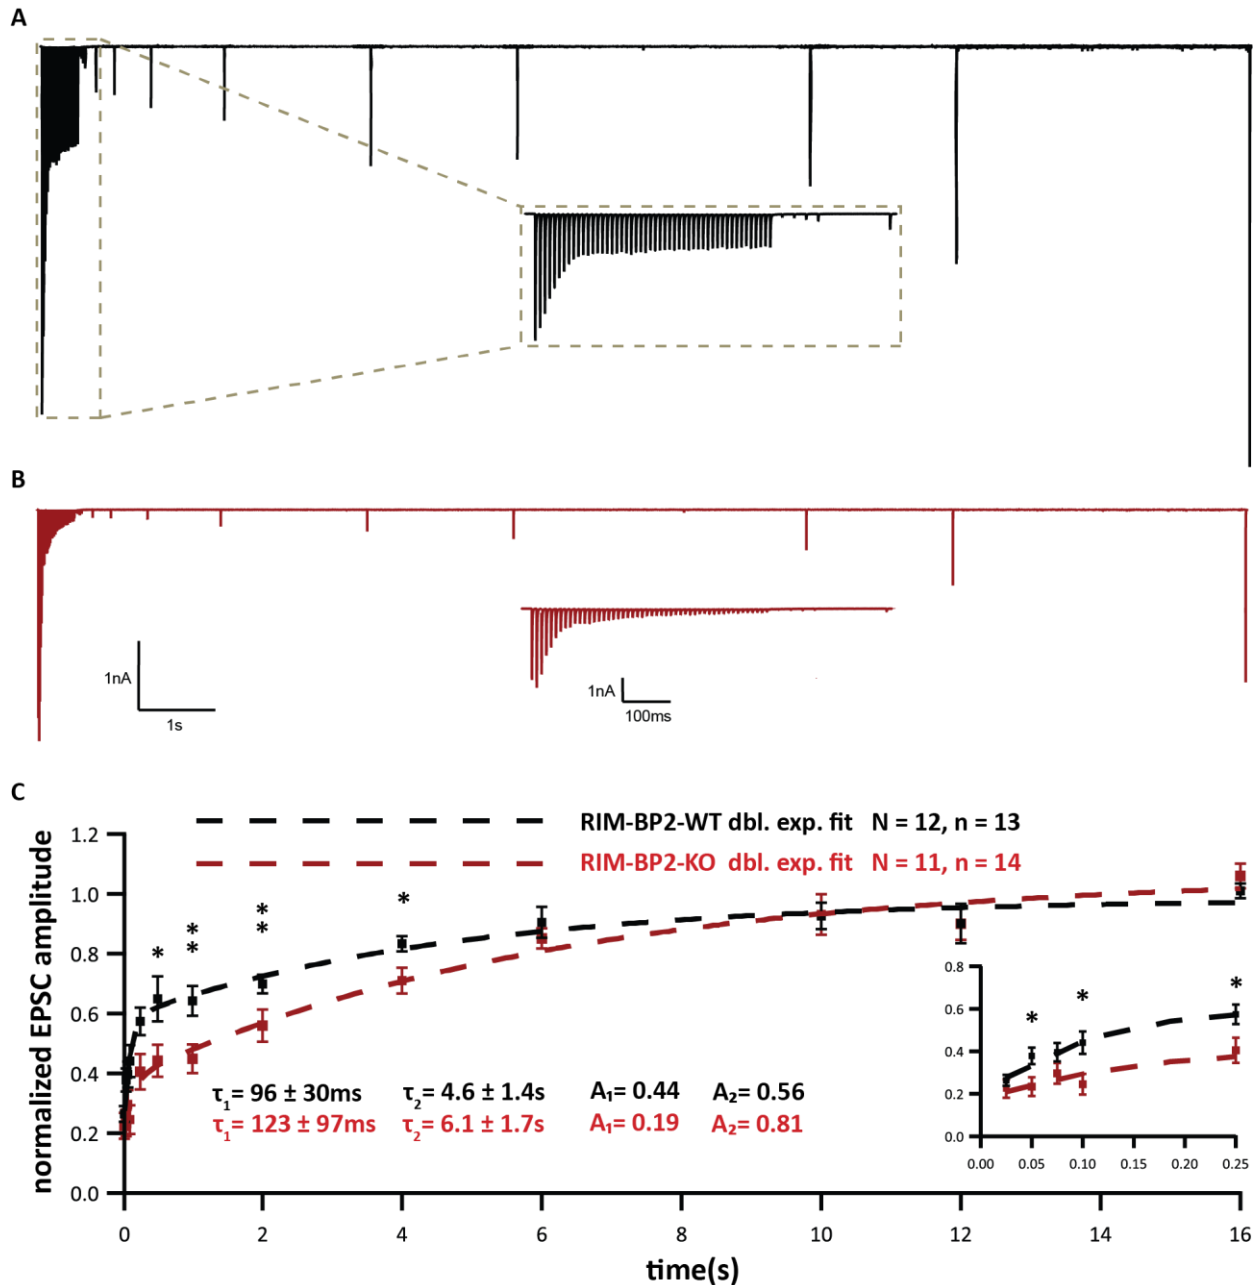

586

587

588 **Figure 4. Slowed RRP recovery in RIM-BP2 deficient endbulb synapses.**

589 (A-B) Representative traces of RIM-BP2 WT (A) and RIM-BP2 KO (B), illustrate the recovery

590 experiment. After a 100 Hz conditioning train of 50 stimuli, single test pulses were delivered at time

591 intervals of (in ms) 25, 50, 75, 100, 250, 500 (further intervals in s), 1, 2, 4, 6, 10, 12 and 16. To assess

592 recovery, the EPSC amplitude in response to the test pulse is normalised to the first EPSC amplitude

593 of the conditioning train. Insets (A, B) show the time course of recovery during the first 5 test stimuli

594 in sub-second detail. (C) Recovery is plotted as mean  $\pm$  SEM EPSC amplitude in response to test pulses

595 normalized to the first EPSC amplitude of the conditioning train. The double exponential fits are

596 represented by the dashed lines for RIM-BP2 WT (black) and RIM-BP2-KO (red). The time constants

597 ( $\tau$ ) and fractional contributions (A) of fast ( $\tau_1$ ,  $A_1$ ) and slow ( $\tau_2$ ,  $A_2$ ) recovery components are provided

598 on the graph. Inset shows the first five responses in detail. Normality was tested with Jarque-Bera

599 test. Statistical significance between groups was tested with Mann-Whitney U-test. \*\**p*-value < 0.01,

\**p*-value < 0.05. *N*: number of animals, *n*: number of BCs

600 The peak firing rate at sound onset was significantly reduced in RIM-BP2 KO BCs (Fig. 5D, by  
601 approximately 40%, Table 3) compatible with the reduced initial release probability. The adapted  
602 firing rates were not significantly reduced (Fig. 5Dii, Table 3), which is consistent the better  
603 maintained EPSC amplitudes during steady state response to train stimulation in BCs (RIM-BP2 WT:  
604  $1.2 \pm 0.2$  nA, RIM-BP2 KO:  $0.9 \pm 0.1$  ) (Fig. 3A-F, Table 2) and the normal adapted firing rate of ANFs  
605 (Krinner et al., 2017) .

606 In addition, we found the temporal jitter of the first spike after stimulus onset to be greater in  
607 RIM-BP2 KO BCs, while the first spike latency was comparable between the two genotypes (Fig. 5E,  
608 Table 3). The stronger reduction of the peak rate and increased first spike latency jitter of BCs in  
609 comparison to ANF likely reflects the impaired transmission at the RIM-BP2-deficient endbulb, which  
610 degrades information processing in the lower auditory pathway beyond what is caused by the mildly  
611 affected synaptic sound encoding in the cochlea. This hypothesis is further supported by the auditory  
612 brainstem responses of RIM-BP2 KO mice, which show a more pronounced amplitude decline for the  
613 aVCN related wave III than for the auditory nerve related wave I (Krinner et al., 2017)). In conclusion,  
614 the reduced release probability of the endbulbs impairs the transmission of sound onset information,  
615 which is likely to hamper hearing and auditory tasks such as gap detection and sound localization in  
616 particular.

617



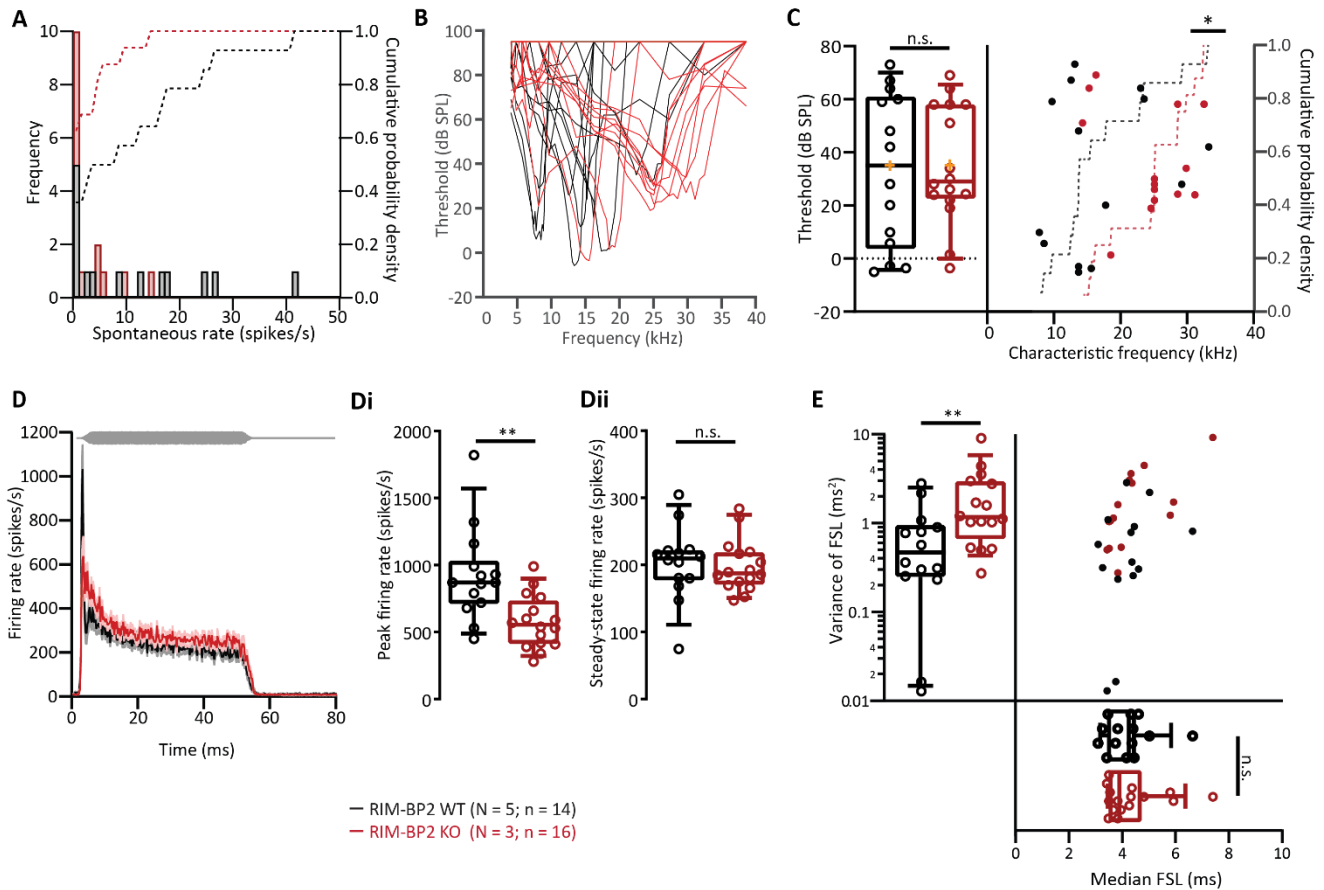

618

619 **Figure 5. Impaired transmission of sound information in aVCN of RIM-BP2 KO mice *in vivo*.**  
 620 **(A)** Comparable distribution of spontaneous firing rates of single BCs in RIM-BP2 WT (black) and RIM-  
 621 BP2 KO (red). The histogram represents the distribution of their frequency (left y-axis) and the dotted  
 622 lines represent the cumulative probability density (right y-axis) of spontaneous firing rates. **(B-C)**  
 623 Representative tuning curves of BC from RIM-BP2 WT (black) and RIM-BP2 KO (red) demonstrate  
 624 preserved sharp frequency tuning and low thresholds at the characteristic frequencies (frequency for  
 625 which spike rate increase requires least sound intensity, **C, left**) in RIM-BP2 KO BCs. For unknown  
 626 reasons, we encountered more BCs with high characteristic frequency in RIM-BP2 KO (**C, right**). **(D)**  
 627 Rise-aligned peristimulus time histogram (PSTH) of the BC response to 50 ms tone burst stimulation  
 628 (at characteristic/best frequency, 30 dB above threshold, stimulus represented in gray) in RIM-BP2  
 629 WT (black; N=5; n=14) and RIM-BP2 KO (red; N=3; n=16). PSTH presented as mean (solid lines)  $\pm$  SEM  
 630 (shaded area). Peak onset firing rate was significantly reduced in RIM-BP2 KO BCs **(Di)** while the  
 631 steady-state firing rate was comparable between the two genotypes **(Dii)**. Variance in the first spike  
 632 latency of PSTH (in D) was increased in RIM-BP2 KO units while the median first spike latency  
 633 remained unperturbed **(E)**. Data information: Significance levels: n.s.  $p \geq 0.05$ , \* $p < 0.05$ , \*\* $p < 0.01$ ;  
 634 n = number of BCs and N = number of mice. Box and whisker plot represents median, lower/upper  
 635 quartiles and 10-90<sup>th</sup> percentiles. Each data point represents the response of a BC. For details about  
 636 mean  $\pm$  SEM, median, sample size and statistics see Table 3.

| Parameter                           | RIM-BP2 WT<br>(N = 5; n = 14) | RIM-BP2 KO<br>(N = 3; n = 16) | p value           |
|-------------------------------------|-------------------------------|-------------------------------|-------------------|
| Spontaneous rate (spikes/s)         | 10.90 ± 3.42 (5.88)           | 2.74 ± 1.07 (0.60)            | 0.18, M           |
| Threshold (dB SPL)                  | 33.20 ± 7.76 (35.00)          | 35.20 ± 5.50 (29.00)          | 0.83, T           |
| Characteristic frequency (kHz)      | 16.75 ± 2.06 (13.66)          | 24.21 ± 1.59 (25.05)          | <b>0.015, K</b>   |
| Peak firing rate (spikes/s)         | 922.10 ± 91.65 (870.00)       | 575.60 ± 49.24 (555.00)       | <b>0.0033, TW</b> |
| Steady-state firing rate (spikes/s) | 202.30 ± 14.53 (209.80)       | 197.80 ± 9.6 (187.40)         | 0.79, T           |
| Variance of FSL (ms <sup>2</sup> )  | 0.76 ± 0.22 (0.47)            | 2.11 ± 0.56 (1.18)            | <b>0.008, M</b>   |
| Median FSL (ms)                     | 4.20 ± 0.24 (4.25)            | 4.36 ± 0.28 (3.90)            | 0.93, M           |

637 **Table 3. Analysis of *in vivo* extracellular recordings from single BCs**

638 Data are presented as mean ± SEM and medians are shown in parentheses. Normality of data  
639 distribution was tested with Kolmogorov-Smirnov test and the variances were compared with F-test.  
640 Statistical test used to assess the significance of differences is indicated in the column of p-value.  
641 Unpaired Student's t-test (shown in the table as T) was used, when the data satisfied the criteria of  
642 normality and variance comparability. Normally distributed data with unequal variances were  
643 compared using Student's t-test with Welch's correction (shown in the table as TW). Non-normally  
644 distributed data were tested with Mann-Whitney U-test or Kolmogorov-Smirnov test (shown in the  
645 table as M and K respectively). *p-value* < 0.05, set as threshold for statistical significance shown in  
646 bold.

647

648 **RIM-BP2 disruption appears not to alter the molecular composition of the endbulb active zones**

649 Given the scope of protein interactions of RIM-BP that includes Ca<sup>2+</sup> channels, large conductance Ca<sup>2+</sup>  
650 activated K<sup>+</sup> channels (Sclip et al., 2018) and multi-domain proteins of the AZ, we considered the  
651 possibility that some of the above described physiological alterations might reflect changes in the  
652 abundance of other AZ proteins. In order to test for potential effects of RIM-BP2 disruption on the  
653 molecular composition of the AZs, we performed semi-quantitative, confocal immunofluorescence  
654 microscopy in coronal brain slices. RIM-BP2 WT and RIM-BP2 KO samples were harvested and  
655 processed strictly in parallel. Likewise, images were acquired using the same laser power and gain  
656 settings at the same confocal microscope. Excitatory AZs facing the postsynaptic BC were identified  
657 by co-localization of immunofluorescence of the targeted AZ protein with the immunofluorescence  
658 of the vesicular glutamate transporter VGlut1 or a juxtaposition to the immunofluorescence of homer  
659 1, a scaffold of excitatory synapses and a lack of juxtaposition to immunofluorescence of gephyrin, a

660 scaffold of inhibitory synapses (Fig. 6). We focused our analysis on the spherical or ovoid BC soma  
661 which are engaged by a corona of synapses. Staining for RIM-BP2 showed the expected corona of  
662 immunofluorescence spots in WT slices, but no obvious synaptic immunofluorescence in RIM-BP2 KO  
663 slices (Fig. 6A, Fig. 6B, left: integrated fluorescence within the Vglut1 positive volume, right: lack of  
664 spots). We did not observe significant differences in the integrated immunofluorescence or the  
665 number of puncta of Munc13-1 (Fig. 6C, D), RIM2 (Fig. 6E, F), CAST (Fig. 6G, H), and bassoon (Fig. 6I,  
666 J) in RIM-BP2 KO slices, suggesting an unaltered abundance of these multi-domain proteins at the  
667 excitatory AZ facing the BC in the absence of RIM-BP2.

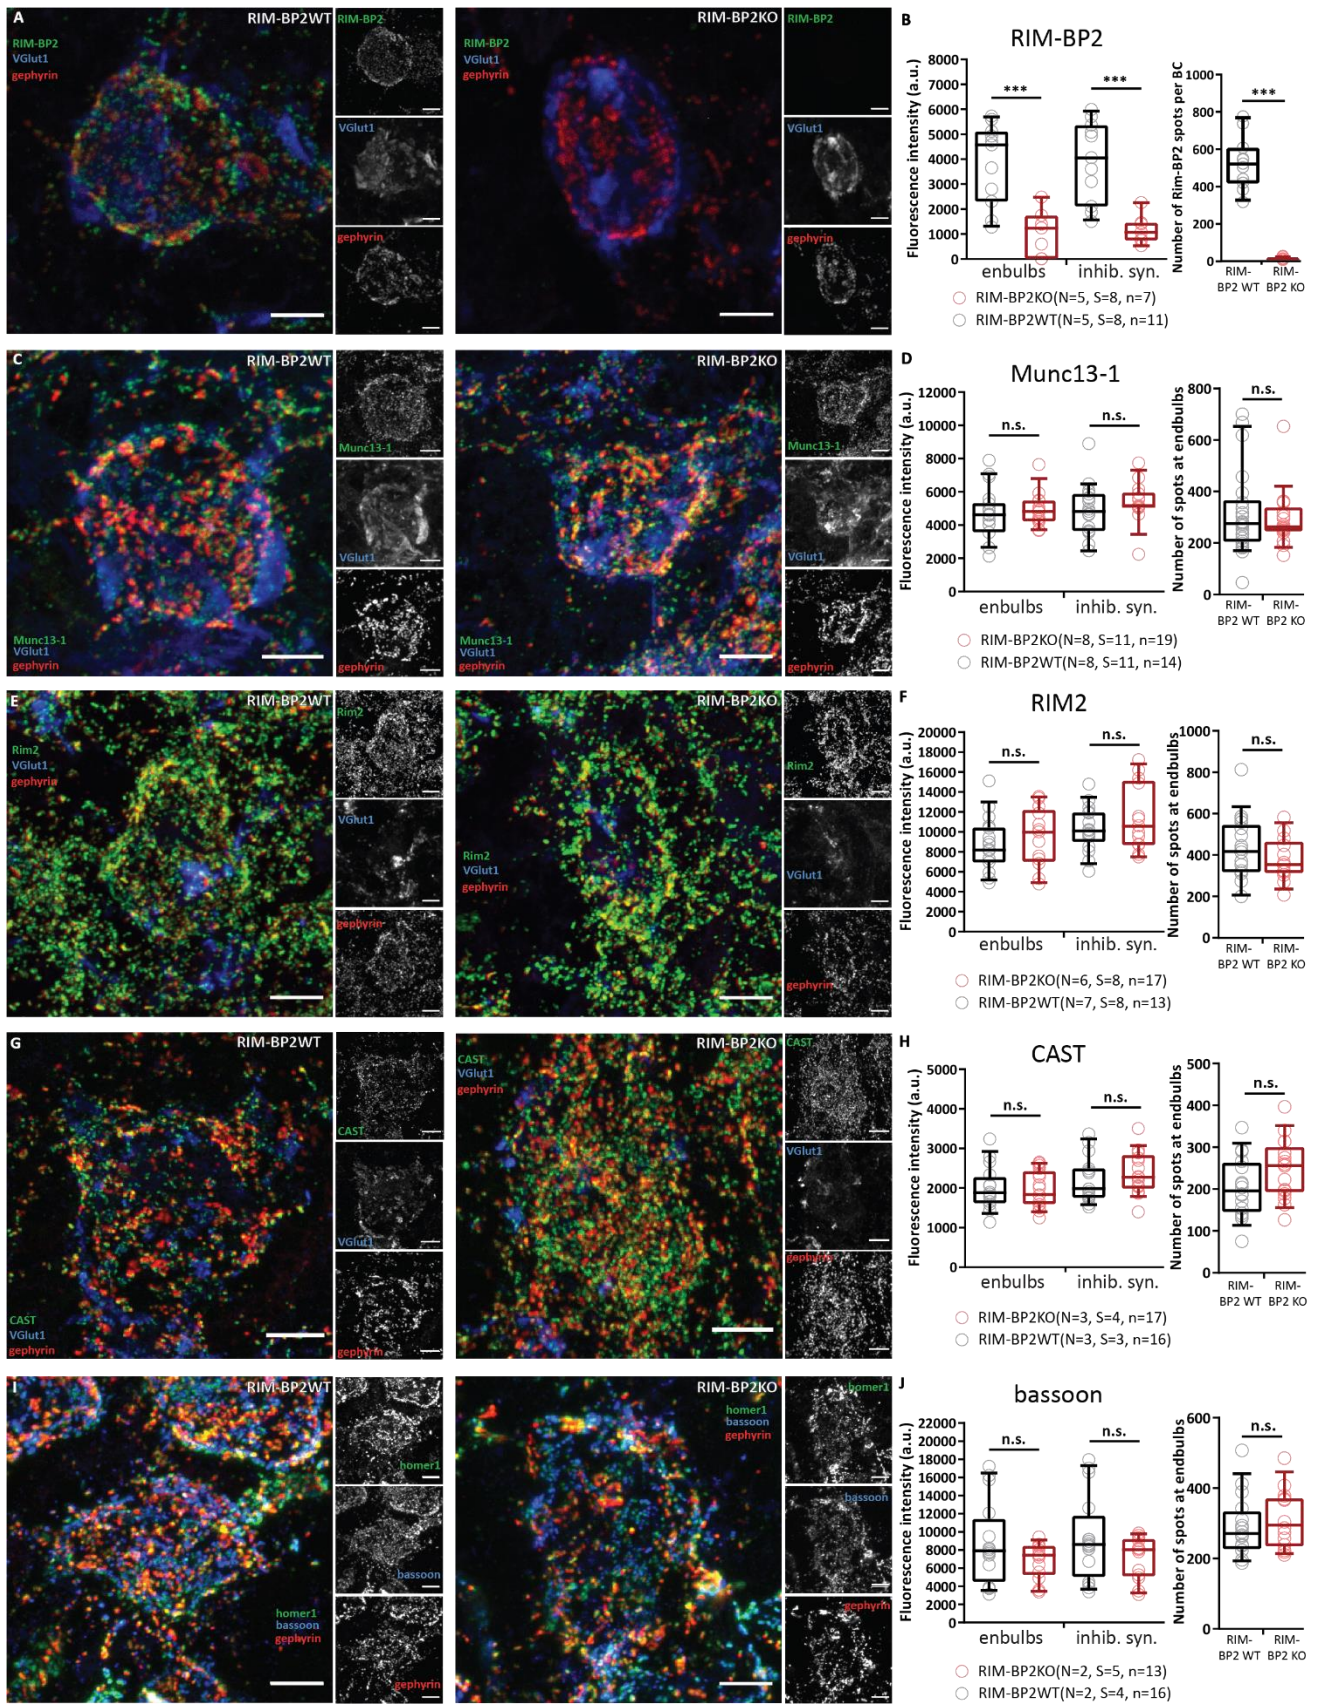

670 **Figure 6. RIM-BP2 disruption does not seem to alter the molecular composition of the endbulb**  
671 **active zones**

672 (A, C, E, G, I) Representative maximal z-projections of confocal image stacks of BCs in RIM-BP2 WT  
673 shown on left and RIM-BP2 KO on right. 30  $\mu\text{m}$  coronal brainstem slices were immunolabelled for  
674 RIM-BP2 (A), Munc13-1 (C), RIM2 (E) and CAST (G) and co-stained for VGlut1 to outline endbulbs and  
675 gephyrin for inhibitory synapse labelling. For bassoon immunolabelling (I) we co-stained for homer1  
676 (excitatory postsynapses) and gephyrin. (B, D, F, H, J) Quantification of fluorescence intensity of CAZ  
677 proteins at endbulbs and inhibitory synapses of BCs (*left*), and the number of spots of the targets CAZ  
678 protein at endbulbs (*right*). (A) Representative z-projection shows loss of RIM-BP2 immunoreactivity  
679 in the RIM-BP2 KO brainstem sliced. There was only a faint residual and likely unspecific signal  
680 remaining at excitatory and inhibitory synapses (B, left), RIM-BP2 immunofluorescent spots were  
681 nearly abolished (B, right). The immunofluorescence intensity of Munc13-1 (D), RIM2 (F), CAST (H)  
682 and bassoon (J) were unaltered at RIM-BP2 KO endbulbs. Right columns of D, F, H, J show similar  
683 number of CAZ protein spots localized at KO endbulb AZs as in the WT AZs. The numbers were  
684 calculated by subtracting the gephyrin colocalized spots from the total number of spots per BC. The  
685 data are presented as box and whiskers plots (grand median of mean estimates for all BCs,  
686 lower/upper quartiles, 10-90<sup>th</sup> percentiles). Each data point represents the mean estimate of  
687 fluorescence intensity of the active zones of each BC included in the analysis. Statistical significance  
688 of differences between groups was determined with unpaired Student's t-test (with Welch's  
689 correction, when variances differed significantly), if the data's distribution did not differ from a  
690 normal distribution or with Mann-Whitney U test in case of non-normally distributed data. Normality  
691 of distribution was tested with Jarque-Bera test and variances were compared with F-test. n.s. p-  
692 value  $\geq 0.05$ . Samples from RIM-BP2 WT and RIM-BP2 KO mice, aged p15-p21 were harvested and  
693 processed strictly in parallel and images were acquired in parallel using the same laser power and  
694 gain settings at the same confocal microscope. Data information: N: number of animals, S: number  
695 of slices, n: number of BCs. All scale bars: 5 $\mu\text{m}$

696  
697 **Increased Ca<sup>2+</sup> influx improves release probability but unmasks impaired SV replenishment during**  
698 **train stimulation**

699 Unaltered Ca<sup>2+</sup> influx and RRP size but reduced P<sub>r</sub> led us to focus the analysis on the coupling of Ca<sup>2+</sup>  
700 channels to SV release. As a first approach we increased the presynaptic Ca<sup>2+</sup> influx by elevating the  
701 extracellular Ca<sup>2+</sup> concentration [Ca<sup>2+</sup>]<sub>e</sub> from physiological (2mM) to 4mM. This manipulation  
702 abolished the differences in P<sub>r</sub> (both time course of depression and PPR were WT-like, Fig. 7, Table  
703 4). This is consistent with a greater diffusional distance between Ca<sup>2+</sup> channels and SV release sites  
704 that can be overcome when more Ca<sup>2+</sup> enters per channel opening. Alternatively, or in addition,  
705 greater Ca<sup>2+</sup> influx might foster Ca<sup>2+</sup> dependent priming or facilitation of release. In addition,

706 increased  $\text{Ca}^{2+}$  influx unmasked a slowed SV replenishment during train stimulation in RIM-BP2  
707 deficient endbulbs.

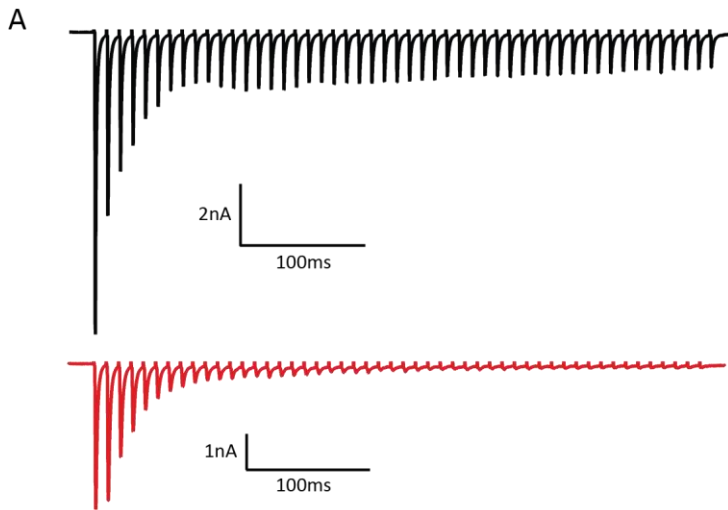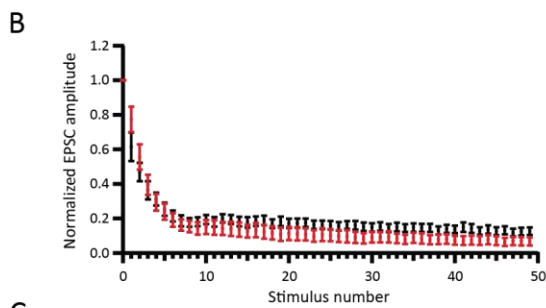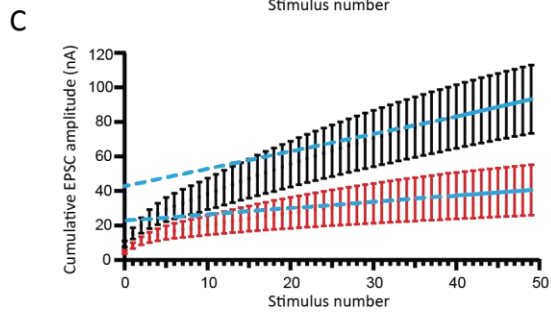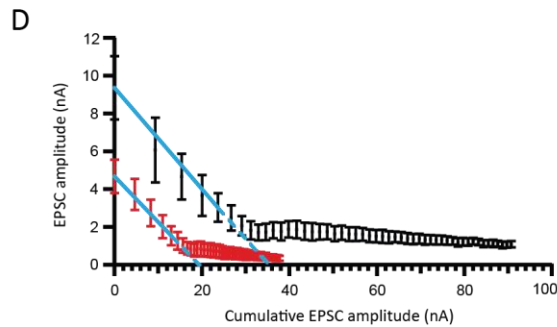

708 **Figure 7. Analysis of release probability ( $P_r$ ) as well as the size and dynamics of the RRP at 4 mM**  
709  **$[\text{Ca}^{2+}]_e$**   
710 **(A)** Representative traces of eEPSCs in response to trains of 50 action potentials delivered at a 100 Hz  
711 frequency, recorded from WT (top, black traces) and RIM-BP2 KO (bottom, red traces). When the  
712

713 mutant terminals are exposed to 4mM  $[Ca^{2+}]_e$ , a WT-like depression pattern is restored. **(B)** This is  
 714 even more obvious when the mean EPSC amplitudes, normalized to the first EPSC of the train are  
 715 plotted against the stimulus number. **(C)** We estimate the size of the readily releasable pool (RRP),  
 716 the rate of vesicle replenishment during the train and the release probability ( $P_r$ ) using the SMN  
 717 method. **(D)** We estimate the RRP size and  $P_r$  using the Elmquist and Quastel (EQ) method. For 100  
 718 Hz: RIM-BP2 WT N = 7; n = 7, RIM-BP2 KO N = 5; n = 5. N, number of animals; n, number of BCs.  
 719 Quantitative analysis is further elaborated in Table 4.  
 720

| Stimulation Frequency | Parameter                       | RBP2 WT                  | RBP2 KO                  | p value          |
|-----------------------|---------------------------------|--------------------------|--------------------------|------------------|
| 100Hz                 | eEPSC1 amplitude (nA)           | 9.36 ± 1.67 (8.07)       | 4.67 ± 0.88 (4.05)       | <b>0.035, T</b>  |
|                       | tau (ms)                        | 21.76 ± 3.44 (20.17)     | 29.19 ± 4.50 (32.89)     | 0.2115, T        |
|                       | eEPSC <sub>30-50</sub>          | 1.22 ± 0.21 (1.23)       | 0.41 ± 0.18 (0.46)       | 0.2020, M        |
|                       | eEPSC <sub>30-50</sub> /EPSCmax | 0.14 ± 0.02 (0.13)       | 0.08 ± 0.03 (0.10)       | 0.1125, T        |
|                       | Replenishment                   | 1.91 ± 0.29 (1.96)       | 0.66 ± 0.26 (0.78)       | <b>0.0116, T</b> |
|                       | RRP <sub>SMN</sub> (SVs)        | 666.43 ± 219.15 (363.98) | 415.15 ± 155.94 (331.33) | 0.5303, M        |
|                       | RRP <sub>EQ</sub> (SVs)         | 602.61 ± 168.87 (518.41) | 358.88 ± 102.66 (320.26) | 0.3434, M        |
|                       | $P_{r\text{SMN}}$               | 0.31 ± 0.04 (0.27)       | 0.26 ± 0.04 (0.22)       | 0.4168, T        |
|                       | $P_{r\text{EQ}}$                | 0.30 ± 0.04 (0.30)       | 0.27 ± 0.04 (0.24)       | 0.6034, T        |
|                       | PPR                             | 0.62 ± 0.08 (0.63)       | 0.77 ± 0.07 (0.79)       | 0.2677, M        |

721  
 722 **Table 4. Analysis of release probability ( $P_r$ ) as well as the size and dynamics of the RRP at 4 mM**  
 723  **$[Ca^{2+}]_e$**

724 **Tau ( $\tau$ ):** time constant of single exponential fit to the decay of eEPSC amplitudes during the  
 725 stimulation train. **eEPSC<sub>30-50</sub>/EPSCmax:** average amplitude of the last 20 EPSCs (30-50) in the train,  
 726 normalized to the amplitude of the largest EPSC of the train. **Replenishment:** rate of vesicle  
 727 replenishment during the train. **RRP:** readily releasable pool.  **$P_r$ :** release probability. **PPR:** paired pulse  
 728 ratio, amplitude of the second EPSC of the train normalized to the amplitude of the first EPSC. Data  
 729 are presented as mean ± SEM and medians are shown in parentheses. Normality of data distribution  
 730 was tested with Jarque-Bera test and the variances were compared with F-test. Statistical significance  
 731 of differences was assessed with unpaired Student's t-test (shown in the table as T), when the data  
 732 satisfied the criteria of normality and variance comparability. When the data did not satisfy these  
 733 criteria, the Mann-Whitney U-test was used instead (shown in the table as M). *p-value* < 0.05, set as  
 734 threshold for statistical significance shown in bold.  
 735

736

737 **RIM-BP2 disruption alters the topography of Ca<sup>2+</sup> channels at endbulb active zones**

738 In order to probe for potential morphological correlates of altered release probability we employed  
739 immunofluorescence microscopy and electron microscopy of immunolabeled Ca<sup>2+</sup> channels. First, we  
740 performed a strictly parallel study of Cav2.1 distribution at excitatory synapses around the BCs of  
741 RIM-BP2 KO and WT mice using stimulated emission depletion (STED) nanoscopy (Fig. 8A-K) as well  
742 as confocal microscopy (as described above, Fig. 8-1A, B). We used bassoon and homer1 as context  
743 markers to analyse the presynaptic Cav2.1 immunofluorescence distribution. Both the integrated  
744 Cav2.1 immunofluorescence intensity per AZ and the number of Cav2.1 puncta were unaltered at the  
745 confocal level (Fig. 8-1B), which is consistent with finding normal presynaptic Ca<sup>2+</sup> influx (Fig. 2). For  
746 our 2-colour STED analysis we focused on AZ/PSD appositions (Cav2.1/homer1, bassoon/homer1) of  
747 endbulbs of Held.

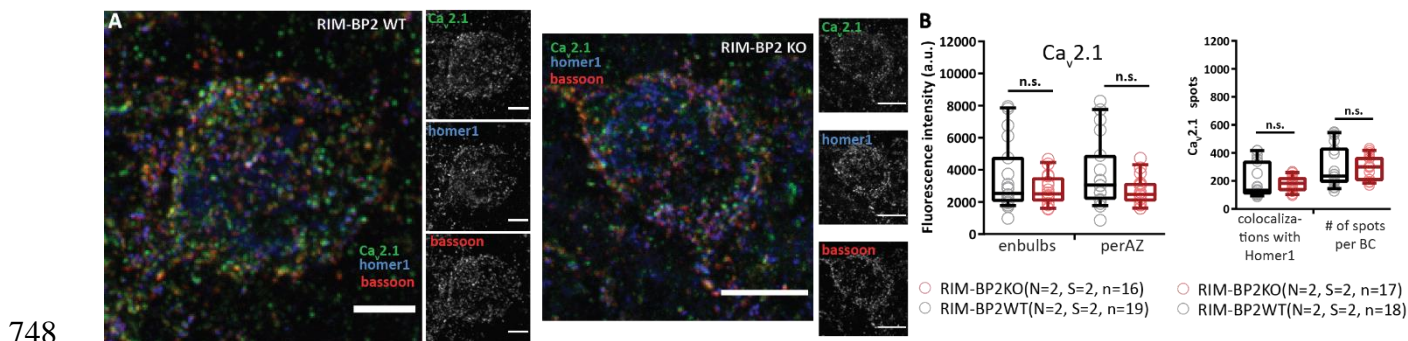

749 **Figure 8-1: Unaltered Cav2.1 immunofluorescence intensity in RIM-BP2-deficient endbulbs of Held**

750 (A) Maximal z-projections from confocal image stacks display the immunolabelling against Cav2.1,  
751 bassoon and homer1 at endbulb AZs in coronal brain-stem slices of mouse aVCN. (B) No quantitative  
752 change was found in the integrated immunofluorescence (left) or number (right) of Cav2.1 puncta in  
753 either the excitatory endbulb AZs (juxtaposed to homer1 immunofluorescence) or all AZs (endbulb +  
754 inhibitory AZ) facing BC of RIM-BP2 KOs. \**p*-value < 0.05. *N*: number of animals, *S*: number of slices,  
755 *n*: number of BCs.

756 We interpret the Cav2.1 and bassoon puncta discerned by STED to represent individual AZs. As the  
757 PSD was studied at confocal resolution, we assume the larger homer1-spots represent a merger of  
758 several small PSDs. We operationally defined the organization of several Cav2.1 or bassoon puncta



760 around a single homer1 spot a synaptic contact assembly (SCA) whereby its center corresponds to  
761 the center of the homer1 punctum. Our analysis indicated a wider spatial distribution of Cav2.1  
762 puncta in RIM-BP2 KO which localized further away from the SCA center and from each other (Fig.  
763 8A-K), suggestive of a more dispersed Cav2.1 topography. Similar findings were made for bassoon  
764 (Fig. 8-2).  
765

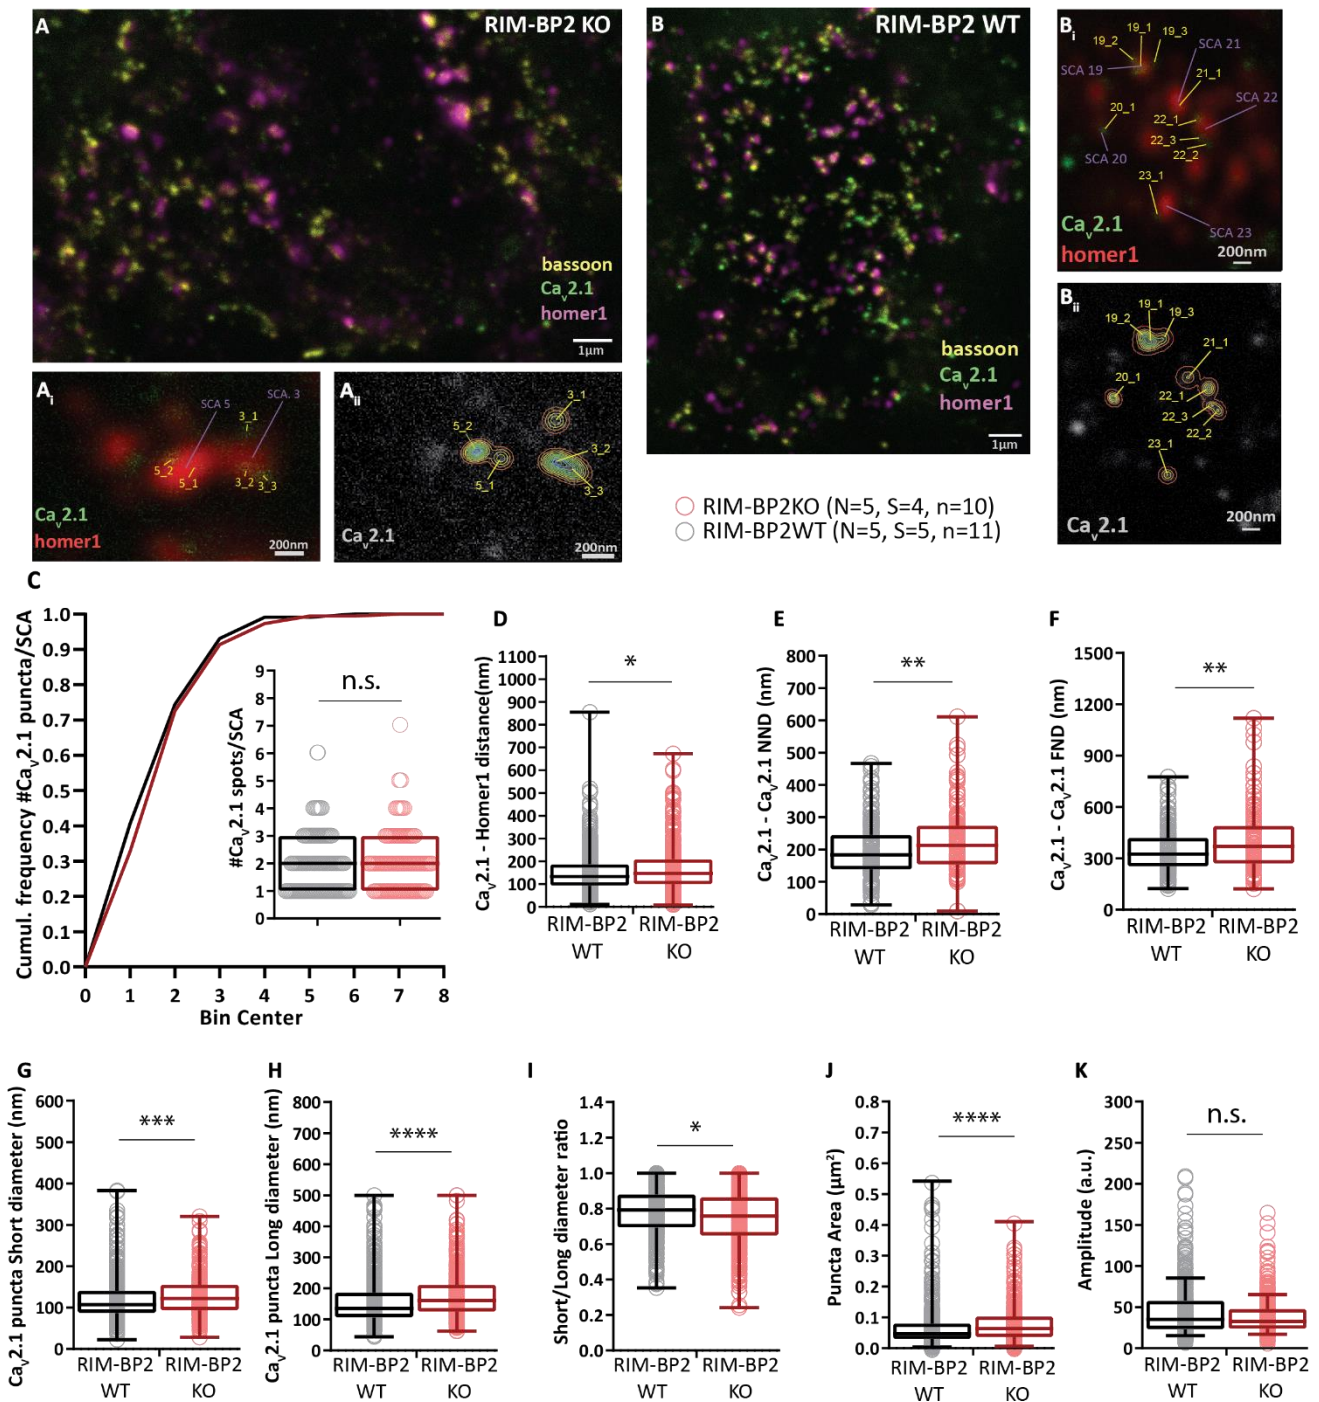

**Figure 8 RIM-BP2 disruption alters the topography of Ca<sup>2+</sup> channels at endbulb active zones**

(A-B) Analysing sections from 20 µm thick brain slices stained for Ca<sub>v</sub>2.1 (STED), bassoon (STED) and homer1 (Confocal) with STED nanoscopy, uncovered differences in the topography and dimensions of Ca<sub>v</sub>2.1 clusters at AZ – to – PSD SCAs of RIM-BP2 WT (A, A<sub>i</sub>, A<sub>ii</sub>) and RIM-BP2 KO (B, B<sub>i</sub>, B<sub>ii</sub>) endbulb terminals. (C) The number of clusters per SCA is unchanged in the KO. In the absence of RIM-BP2, the Ca<sub>v</sub>2.1 puncta (yellow tags A<sub>i</sub>, A<sub>ii</sub>, B<sub>i</sub>, B<sub>ii</sub>) are located further from the center of the SCA (D), defined as the center of the Homer1 puncta (violet tags A<sub>i</sub>, B<sub>i</sub>). The clusters are also located further apart from each other, shown by increased Nearest Neighbour (E) and Furthest Neighbour (F) distances within SCAs. (G, H, J) 2D – Gaussian fitting yielded the short and long cluster diameters at half maxima. (I) The deletion of RIM-BP2 leads to larger and more elongated Ca<sub>v</sub>2.1 puncta at the endbulb of Held

766  
767  
768  
769  
770  
771  
772  
773  
774  
775  
776

777 active zones. (K) The amplitude of fluorescence at the center of  $Ca_v2.1$  puncta does not differ  
 778 significantly between RIM-BP2 WT and RIM-BP2 KO active zones. Normality was tested with Jarque-  
 779 Bera test. Statistical significance between groups was tested with Mann-Whitney U-test for non-  
 780 normally distributed data or with Student's t-test. \*\*\*\* $p$ -value < 0.0001, \*\*\* $p$ -value < 0.001, \*\* $p$ -  
 781 value < 0.01, \* $p$ -value < 0.05.  $N$ : number of animals,  $S$ : number of slices,  $n$ : number of BCs.  
 782

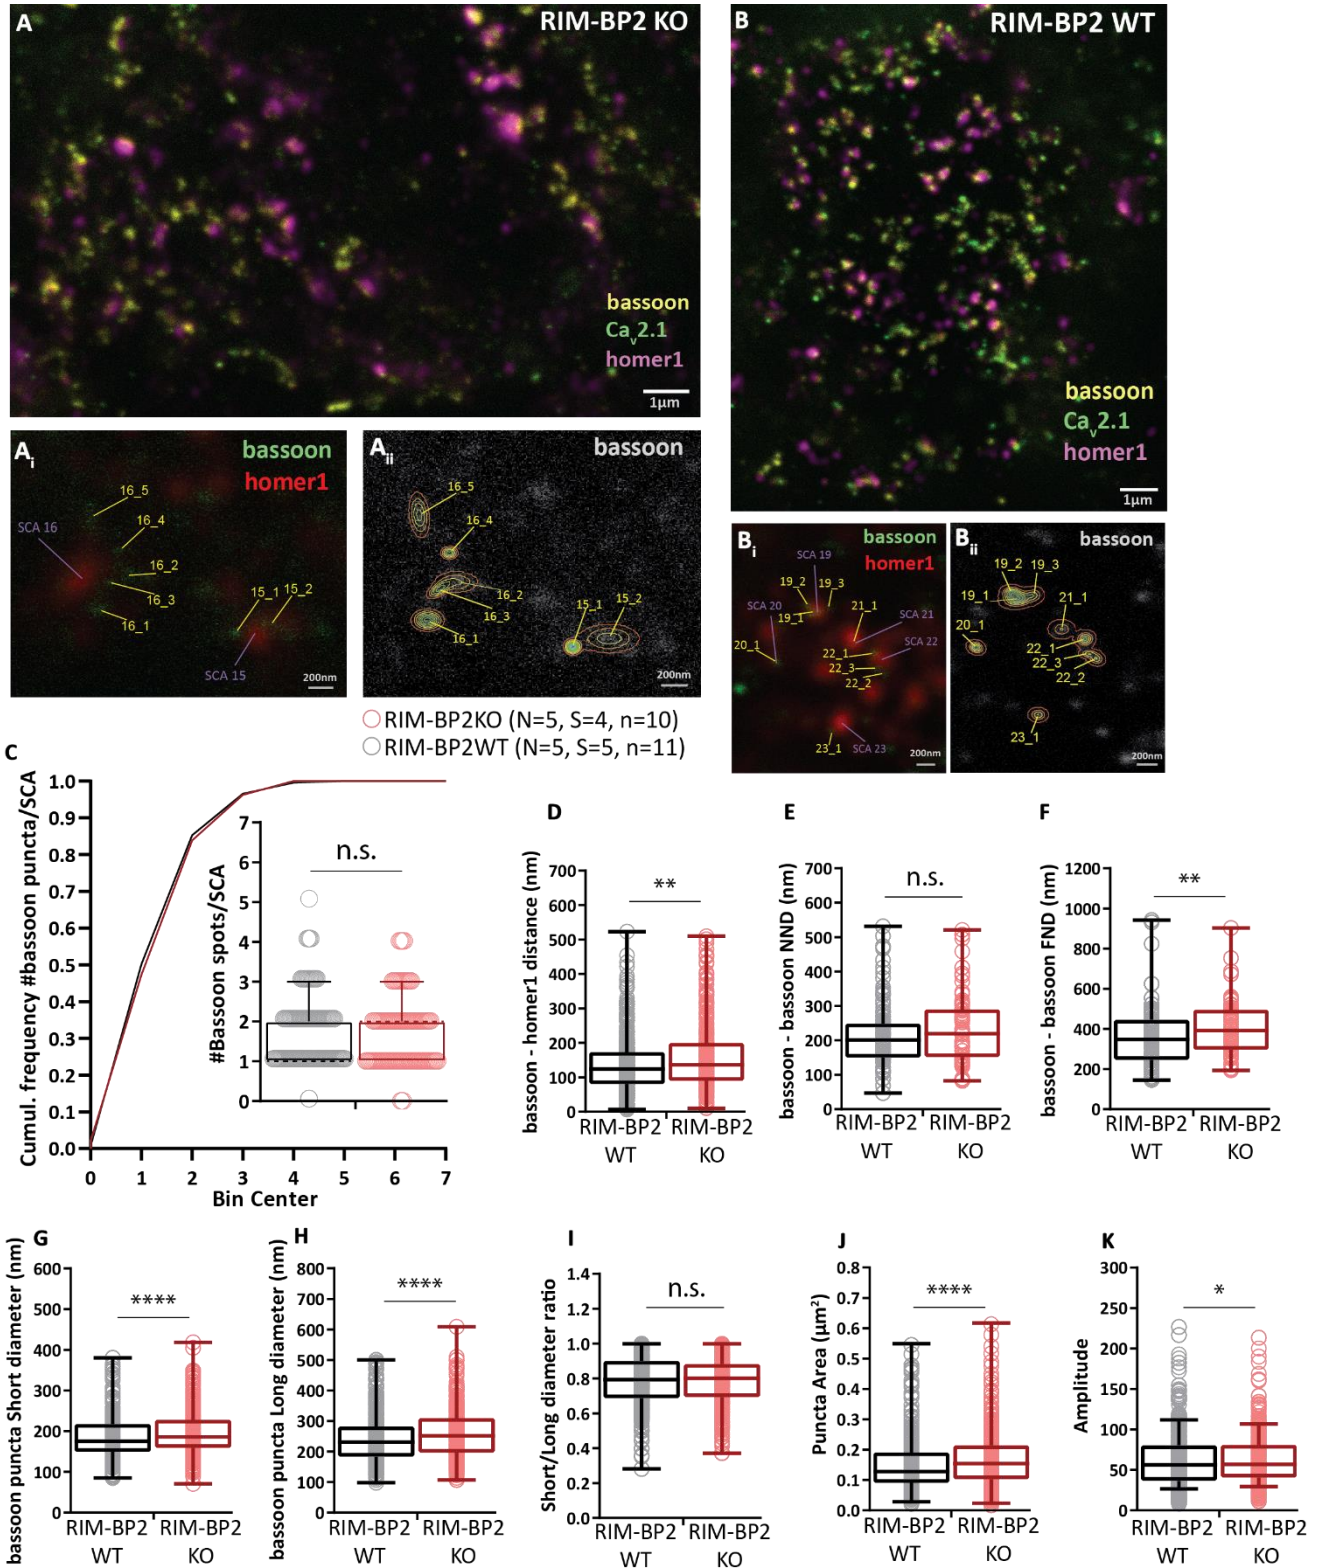

783

784 **Figure 8-2. RIM-BP2 disruption alters distribution and extent of bassoon clusters marking the**  
785 **presynaptic density of endbulb active zones**

786 Analysing sections (**A, B**) from 20  $\mu\text{m}$  thick brain slices stained for  $\text{Ca}_v2.1$  (STED), bassoon (STED) and  
787 homer1 (Confocal) with super-resolution STED microscopy, uncovered differences in the amplitude  
788 of fluorescence, topography and dimensions of bassoon positive puncta in the absence of RIM-BP2.  
789 The bassoon puncta were detected and fitted with 2D – Gaussian functions at AZ – to – PSD SCAs of  
790 RIM-BP2 WT (**A, A<sub>i</sub>, A<sub>ii</sub>**) and RIM-BP2 KO (**B, B<sub>i</sub>, b<sub>ii</sub>**) endbulb terminals. The number of puncta per SCA  
791 is unchanged in the KO (**C**). In the absence of RIM-BP2, the bassoon puncta (yellow tags **A<sub>i</sub>, A<sub>ii</sub>, B<sub>i</sub>, B<sub>ii</sub>**)  
792 are located further from the center of the SCA (**D**), defined as the center of the postsynaptic homer1  
793 puncta (violet tags **A<sub>i</sub>, B<sub>i</sub>**). We found no significant difference in the Nearest Neighbour distance (**E**).  
794 Furthest neighbour distance (**F**) was significantly increased in the mutant. Comparing the short and  
795 long puncta diameters at half maxima, shows that the deletion of RIM-BP2 leads to proportionally  
796 (no change in short/long diameter ratio, **I**) larger (**G, H, J**) bassoon puncta at endbulb of Held active  
797 zones. The amplitude of fluorescence at the center of bassoon puncta is significantly increased RIM-  
798 BP2 KO active zones (**K**). Normality was tested with Jarque-Bera test. Statistical significance between  
799 groups was tested with Mann-Whitney U-test for non-normally distributed data and with Student's  
800 t-test for data showing a normal distribution. \*\*\*\**p-value* < 0.0001, \*\*\**p-value* < 0.001, \*\**p-value* <  
801 0.01, \**p-value* < 0.05. *N*: number of animals, *S*: number of slices, *n*: number of BCs.  
802

803 We then turned to immunolabelling of  $\text{Ca}_v2.1$  in SDS-treated freeze-fracture replica (SDS-FRIL,  
804 (Nakamura et al., 2015)). To image the endbulbs onto the BCs, we focused on the BC rich rostral-most  
805 aVCN sections of the brainstem. Endbulb terminals were prominently distinguishable in our replicas  
806 by their large size synapsing on to the BC soma (Fig. 9-1A). We also validated that we were imaging  
807 the correct area and cell type, by analysing the intramembrane particle (IMP) clusters representing  
808 PSDs on the exoplasmic face (E-face) of the BC soma (Fig. 9-1C-F). Our estimates of PSD areas (Fig. 9-  
809 1B, Table 5) were comparable to the ones previously reported for ANF-BC synapses (Rubio et al.,  
810 2017). We then assessed the protoplasmic face (P-face) of the replicas for the analysis of AZ proteins  
811 and  $\text{Ca}_v2.1$  channel distribution (Fig. 9-2). AZs were located by simultaneous immunolabelling of three  
812 characteristic AZ proteins: RIM, neuexin, and ELKS with 5 nm gold particles. The number of AZ  
813 particles was less than that previously observed in other types of synapses (Miki et al., 2017) which  
814 might reflect lower expression of ELKS in the endbulb synapses. Since the samples from both  
815 genotypes were handled simultaneously by the same experimenter, the comparison between the

816 genotypes remains valid. Nonetheless, given the low labelling efficiency for AZ proteins, we used AZ  
817 markers primarily to identify the location of AZs. AZ area was characterized by IMPs of distinct shape,  
818 number and size compared with those in surrounding areas, and demarcated manually by connecting  
819 the outermost IMPs (Fig. 9-2B-C). The estimated AZ area was comparable between RIM-BP2 KO and  
820 WT (Fig. 9-2D). When analysing the distribution of Cav2.1 channels labelled with 10 nm gold particles  
821 within the AZ area, both the number and density of Cav2.1 particles were significantly reduced in the  
822 RIM-BP2 KO (Fig. 9-2G-H, Table 5).

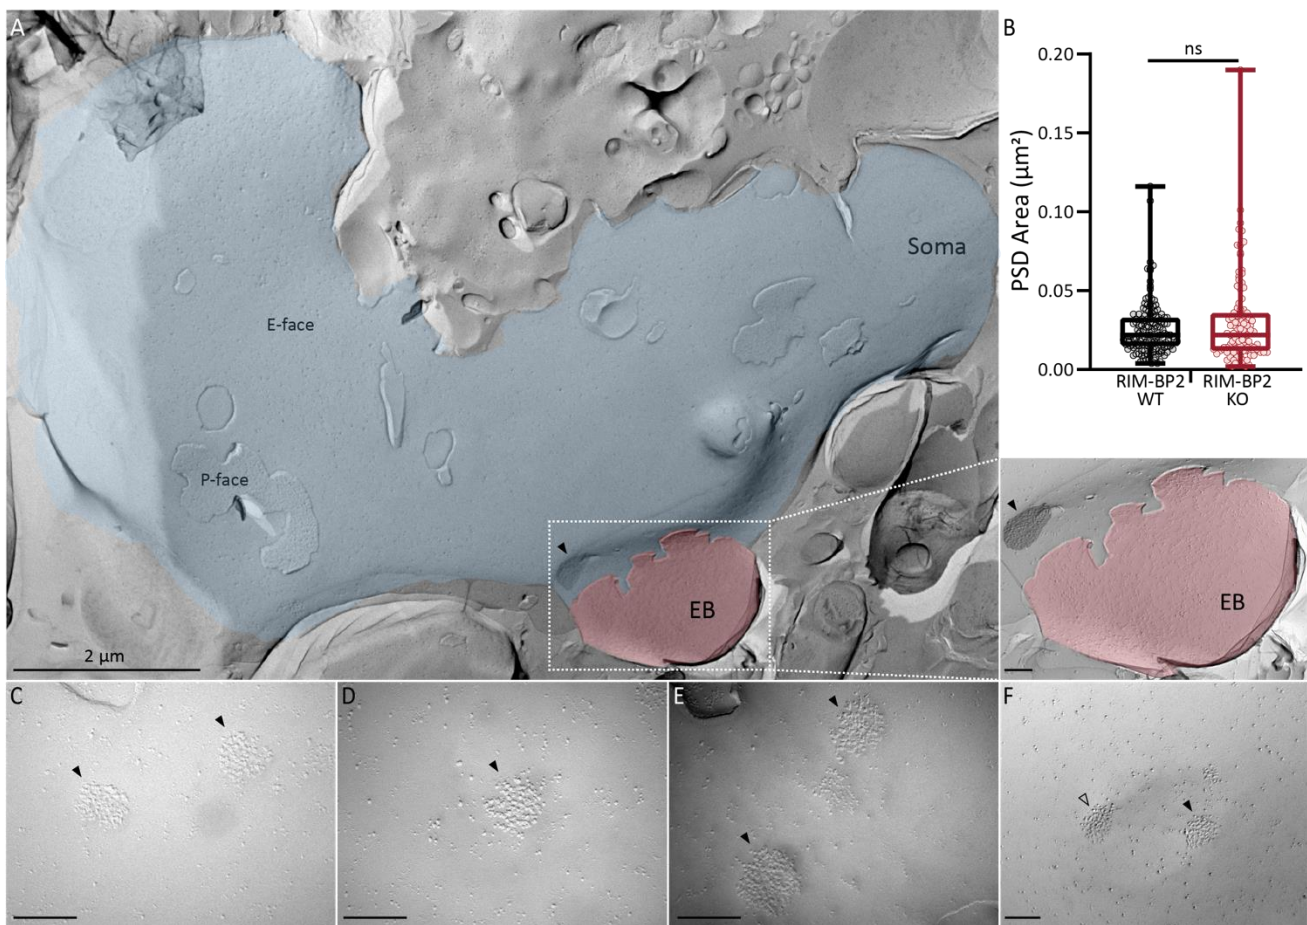

823

### 824 **Figure 9-1. Identification of endbulb of Held synapses**

825 (A) SDS-FRIL electron micrograph at low magnification (9700x) showing E-face of a bushy cell (BC)  
826 soma (blue) with patches of P-face, contacted by an endbulb (red). IMP-cluster representing the PSD  
827 of auditory nerve on the BC soma highlighted in black with a solid black arrow head. Inset shows the  
828 magnified (97,000x) view of the endbulb synapse on to the BC with a PSD IMP-cluster. (B) Comparable

829 PSD areas at endbulbs of Held in RIM-BP2 WT and KO. **(C-F)** High magnification (C-E 93,000x; F  
830 97,000x) images of IMP-clusters of BC soma facing the endbulb. PSD IMP-clusters indicated by solid  
831 black arrow heads. Open black arrow head in F marks the PSD IMP-cluster that lies on the curvature  
832 of the synaptic cleft depression and hence was not included in the analysis. All unmarked scale bars  
833 are 200 nm. For details about PSD values, sample size and statistics see Table 5.

834

835 A low labelling efficiency for AZ proteins would overestimate the AZ to AZ and Cav2.1 to AZ particles  
836 nearest neighbour distances (NNDs). Hence, we only compared the NND for Cav2.1 to Cav2.1 and AZ  
837 to Cav2.1 particles. The value of mean + 2 standard deviations of the Gaussian fit to the distribution  
838 of Cav2.1 to Cav2.1 NNDs was considered the threshold for the maximum distance by which two  
839 particles can be separated and still belong to the same cluster (Fig 9A-B, see materials and methods):  
840 mean + 2 s.d. were 43.09 nm and 43.92 nm for WT and RIM-BP2 KO respectively. The threshold used  
841 for defining a cluster in our analysis was 40 nm as used in previous analysis (Miki et al., 2017). In many  
842 KO AZ images, there were not even three Cav2.1 gold particles to qualify as a cluster (Fig. 9-2C). Within  
843 the qualified clusters, we still found a significantly reduced number of Cav2.1 particles per cluster in  
844 the RIM-BP2 KO (Table 5) which is consistent with a more dispersed Cav2.1 topography at the AZ as  
845 indicated in the STED analysis. To confirm that the clusters obtained in our analysis were valid and  
846 not reflecting chance occurrence, we compared our 'real' data to 500 random simulations of cluster  
847 arrangements (see materials and methods, and (Luján et al., 2018; Kleindienst et al., 2020)). Table 6  
848 confirms the validity of Cav2.1 clusters and NNDs between Cav2.1 to Cav2.1 and AZ to Cav2.1 particles.  
849 The major findings of our FRIL analysis are the significantly lower number and density of Cav2.1  
850 channels as well as the increased AZ to Cav2.1 NND in RIM-BP2 KO AZs (Fig. 9C, Table 5). There was a  
851 trend toward larger Cav2.1 to Cav2.1 NND at RIM-BP2 KO AZs which did not reach significance (Fig.  
852 9D). The increased AZ to Cav2.1 NND implies a looser coupling between the Ca<sup>2+</sup> channels and the AZ  
853 proteins likely marking SV release sites.

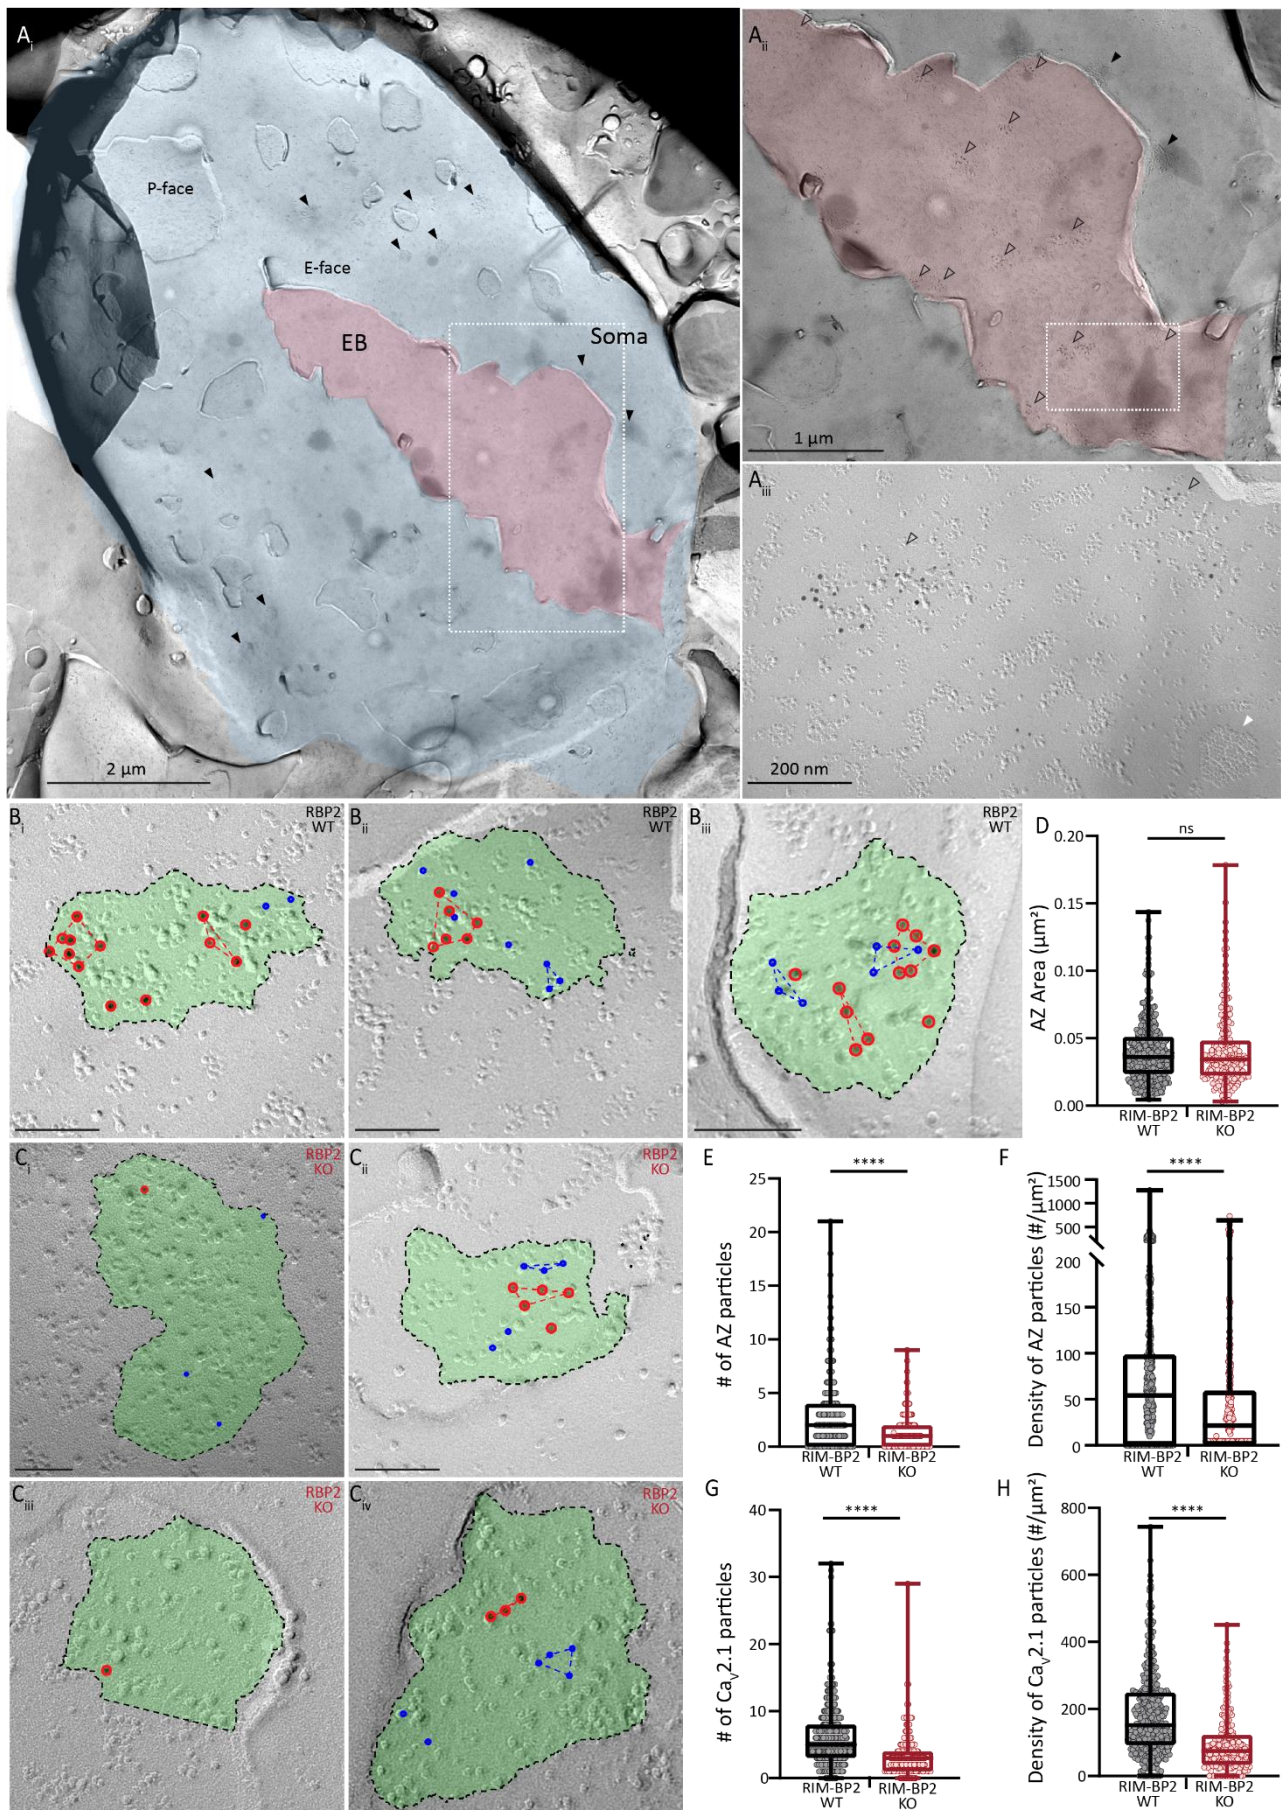

855 **Figure 9-2. Similar AZ size but reduced number of AZ and  $Ca_v2.1$  labels in endbulbs of RIM-BP2 KO**

856 (A) SDS-FRIL electron micrograph at low magnification (9700x) showing E-face of a bushy cell (BC)  
 857 soma (blue) with patches of P-face, connected to an endbulb (red). (Ai) Some of the IMP-clusters  
 858 representing the PSDs of ANF on the BC soma highlighted by solid black arrow heads. (Aii) Magnified  
 859 (18,500x) view of the box in Ai of endbulb synapse (red) on to the BC soma (blue) with IMP-clusters  
 860 for AZ and PSD indicated by open and solid black arrows respectively. (Aiii) Magnified (97,000x) view  
 861 of the box in Aii with IMP-clusters for AZ indicated by open arrows and P-face of a gap junction  
 862 indicated by a solid white arrow. (B-C) FRIL images showing endbulb AZs (green) in RIM-BP2 WT (B)  
 863 and KO (C), immunolabelled for AZ molecules (RIM, neurexin, ELKS) and  $Ca_v2.1$  channels with 5 nm  
 864 (blue circles) and 10 nm (red circles) gold particles respectively. (D-H) Quantitative analysis of AZ area  
 865 (D), number of AZ (E) and  $Ca_v2.1$  (G) gold particles, and density of AZ (F) and  $Ca_v2.1$  (H) gold particles.  
 866 All unlabelled scale bars are 100 nm. ns: not significant, \*\*\*\*  $p$ -value < 0.0001. For details about mean  
 867  $\pm$  SEM, median, sample size and statistics see Table 5.

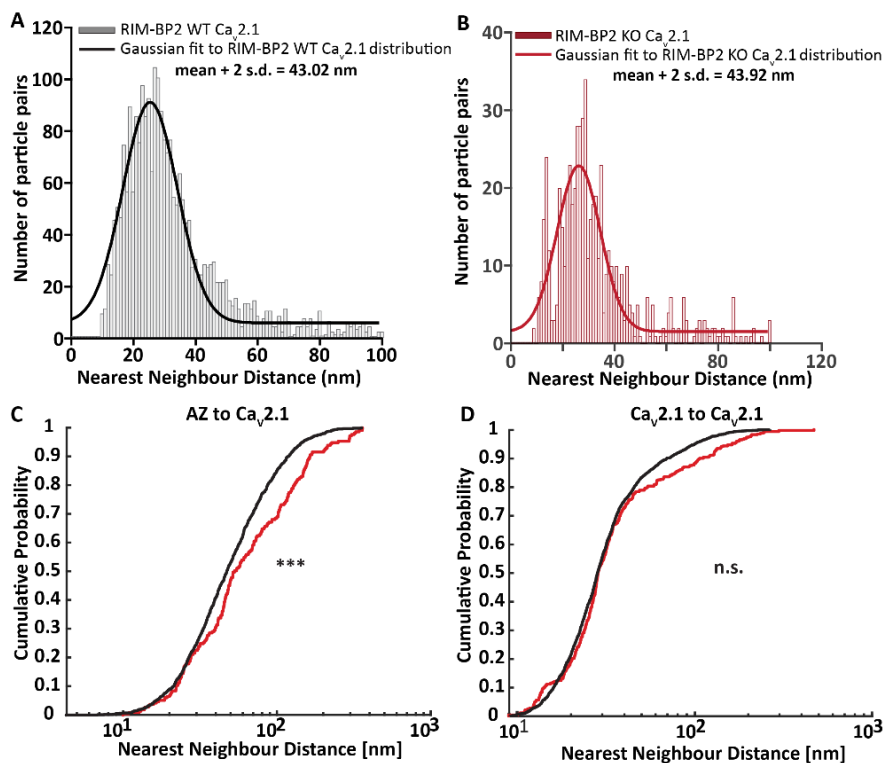

868

869 **Figure 9. Altered topography of  $Ca_v$  channels relative to AZ proteins**

870 (A-B) Histogram of nearest neighbor distances (NNDs) between  $Ca_v2.1$  to  $Ca_v2.1$  gold particles in RIM-  
 871 BP2 WT (A) and KO (B). The solid bold line represents Gaussian curve fitted to the NND distribution  
 872 in RIM-BP2 WT (black, A) and KO (red, B). (C-D) Cumulative probability of NNDs between AZ to  $Ca_v2.1$   
 873 particles (C) and  $Ca_v2.1$  to  $Ca_v2.1$  particles (D) in RIM-BP2 WT (black) and KO (red). ns: not significant,  
 874 \*\*\*  $p$ -value < 0.001. For details about mean  $\pm$  SEM, median, sample size and statistics see Table 5.



|                                              | Parameter                                       | RIM-BP2 WT                  | RIM-BP2 KO                 | p value                  |
|----------------------------------------------|-------------------------------------------------|-----------------------------|----------------------------|--------------------------|
| <b>Sample Size</b>                           |                                                 |                             |                            |                          |
|                                              | # of animals                                    | 3                           | 3                          | -                        |
|                                              | # of replicas                                   | 6                           | 5                          | -                        |
|                                              | # of images                                     | 437                         | 196                        | -                        |
|                                              | # of PSD                                        | 136                         | 102                        | -                        |
| <b>Area Analysis</b>                         |                                                 |                             |                            |                          |
|                                              | AZ area ( $\mu\text{m}^2$ )                     | 0.040 $\pm$ 0.001 (0.036)   | 0.041 $\pm$ 0.002 (0.034)  | 0.75, M                  |
|                                              | PSD area ( $\mu\text{m}^2$ )                    | 0.026 $\pm$ 0.002 (0.022)   | 0.030 $\pm$ 0.003 (0.022)  | 0.89, M                  |
| <b>Gold Particles</b>                        | <b>Gold Particle Analysis</b>                   |                             |                            |                          |
| <b>AZ (5 nm)</b>                             | # of particles/ AZ area                         | 2.74 $\pm$ 0.14 (2.00)      | 1.34 $\pm$ 0.12 (1)        | <0.0001, M               |
|                                              | Density ( $\#/\mu\text{m}^2$ )                  | 76.65 $\pm$ 4.72 (54.13)    | 47.91 $\pm$ 6.21 (21.41)   | <0.0001, M               |
| <b>Ca<sub>v</sub>2.1 (10 nm)</b>             | # of particles/ AZ area                         | 6.30 $\pm$ 0.22 (5.00)      | 3.31 $\pm$ 0.23 (3.00)     | <0.0001, M               |
|                                              | Density ( $\#/\mu\text{m}^2$ )                  | 181.10 $\pm$ 5.93 (151.30)  | 96.88 $\pm$ 6.19 (73.72)   | <0.0001, M               |
| <b>Cluster Analysis</b>                      |                                                 |                             |                            |                          |
| <b>Ca<sub>v</sub>2.1 (10 nm)</b>             | # of clusters                                   | 342                         | 74                         | -                        |
|                                              | # of particles/cluster                          | 4.36 $\pm$ 0.13 (4.00)      | 3.80 $\pm$ 0.16 (3.00)     | 0.0011, M                |
|                                              | Area of cluster ( $\text{nm}^2$ )               | 976.25 $\pm$ 88.99 (590.90) | 659.50 $\pm$ 95.37 (418.3) | 0.013, M                 |
| <b>Particle 1 - Particle 2</b>               | <b>Nearest Neighbor Distance (NND) Analysis</b> |                             |                            |                          |
| <b>Ca<sub>v</sub>2.1 - Ca<sub>v</sub>2.1</b> | NND (nm)                                        | 37.49 $\pm$ 0.57 (28.35)    | 47.50 $\pm$ 2.25 (28.56)   | 0.05, M                  |
|                                              | <b>AZ - Ca<sub>v</sub>2.1</b>                   | NND (nm)                    | 60.84 $\pm$ 1.36 (47.28)   | 83.64 $\pm$ 5.03 (53.16) |

875

876 **Table 5 – Quantitative analysis SDS-FRIL electron micrographs**

877 Data were distributed non-normally as determined by Kolmogorov-Smirnov test. Statistical  
 878 significance of the comparison between RIM-BP2 WT and KO was determined by Mann-Whitney U-  
 879 Test (denoted in the table as M).

880

881

| Genotype                      | Au Particles                              | Parameter                                       | Real Data       | Simulated Data  | p value   |
|-------------------------------|-------------------------------------------|-------------------------------------------------|-----------------|-----------------|-----------|
|                               |                                           | <b>Sample Size</b>                              |                 |                 |           |
|                               |                                           | # of animals                                    | 3               | 3               | -         |
|                               |                                           | # of replicas                                   | 6               | 5               | -         |
|                               |                                           | # of images                                     | 437             | 196             | -         |
| <b>Cluster Analysis</b>       |                                           |                                                 |                 |                 |           |
| RIM-BP2<br>KO                 | AZ<br>(5 nm)                              | # of clusters/AZ                                | 0.08 ± 0.02     | 0.05 ± 0.01     | 0.015     |
|                               |                                           | # of particles/cluster                          | 4.33 ± 0.43     | 3.71 ± 0.33     | 0.006     |
|                               |                                           | Area of cluster (nm <sup>2</sup> )              | 759.82 ± 186.11 | 542.89 ± 125.05 | 0.09      |
|                               | Cav2.1<br>(10 nm)                         | # of clusters/AZ                                | 0.38 ± 0.04     | 0.15 ± 0.02     | 6.13 e-13 |
|                               |                                           | # of particles/cluster                          | 3.80 ± 0.16     | 3.35 ± 0.06     | 0.0003    |
|                               |                                           | Area of cluster (nm <sup>2</sup> )              | 659.50 ± 95.37  | 438.90 ± 29.90  | 0.005     |
| Particle 1<br>- Particle<br>2 | Particle 1 -<br>Particle 2                | <b>Nearest Neighbor Distance (NND) Analysis</b> |                 |                 |           |
| WT                            | Ca <sub>v</sub> 2.1 - Ca <sub>v</sub> 2.1 | NND (nm)                                        | 42.13 ± 1.29    | 55.20 ± 1.05    | 5.87 e-28 |
| RIM-BP2<br>KO                 | Ca <sub>v</sub> 2.1- Ca <sub>v</sub> 2.1  | NND (nm)                                        | 58.14 ± 5.25    | 85.91 ± 4.80    | 1.84 e-06 |

882

883 **Table 6 – Comparison of Real and simulated distribution of gold particles**

884 Real data were compared with 500 random and fitted (only NND analysis) simulations to confirm that  
885 the observed clusters and NND distribution are significantly different from chance (random)  
886 occurrence.

887

888 **RIM-BP2 disruption alters the SV organization at the endbulb active zones**

889 Next, we high pressure froze aVCNs slices, acutely prepared as for physiology in order to best relate  
890 structure and function, for electron tomography analysis of SV organization at the endbulb AZ.

891 Following freeze-substitution, embedding, sectioning and tomography, we rigorously analysed and  
892 reconstructed AZ of RIM-BP2 deficient and WT endbulb synapses (Fig. 10). The AZ area, approximated

893 from the extent of the postsynaptic density, was significantly larger in RIM-BP2-deficient endbulbs

894 (Fig. 10C & Table 7,  $p < 0.01$ , Student's t-test). The number (Fig. 10D) and density (Fig. 10E) of SVs per

895 AZ were not altered. For a more comprehensive analysis we compared the SV distribution within 200  
896 nm of the presynaptic AZ membrane (perpendicular to the presynaptic membrane into the cytosol of  
897 the presynaptic terminal) in 20 nm bins. Morphologically docked SVs (0-2 nm distance), analyzed  
898 separately, were significantly fewer in number at RIM-BP2 KO AZs. Significantly fewer SVs were also  
899 found for non-docked membrane proximal SVs (2 to 20 nm) and SVs within 40 to 60 nm from the AZ  
900 membrane (Fig 10F,  $p < 0.01$ , Wilcoxon rank test, Table 7). We also analysed top-views of the AZs  
901 showing only the docked SVs in the models generated from the tomograms and quantified the  
902 percentage of AZs with zero to eight docked SVs. We found that 50% of the analysed RIM-BP2 KO AZs  
903 showed zero docked SVs, while two docked SVs per AZ were most frequently encountered in WT (27%  
904 of the AZs, Fig. 10G). We further tested for effects of RIM-BP2 disruption on the lateral distribution  
905 of the docked SVs by setting a central point within the generated top views and quantifying the  
906 distances of all docked SVs from the center (we note that the AZ area captured in the tomograms  
907 might not necessarily allow proper definition of the AZ center). The docked SVs appeared to be  
908 further away from the center in RIM-BP2 KO synapses, possibly representing a broader distribution  
909 over the whole AZs area (Fig. 10J). To analyse the membrane proximal SVs in more detail, we  
910 quantified the proportion of SVs in the 2-20 nm bin and observed a shift towards fewer SVs at mutant  
911 AZs. Whereas most of the WT (15%) AZs contained 6 SVs within 2-20 nm from the AZ membrane,  
912 most mutant AZs showed only 2 or 5 SVs within this distance (Fig. 10K). Lastly, by measuring the  
913 diameter of SVs, we found that they exhibited comparable sizes at RIM-BP2 KO and RIM-BP2 WT  
914 endbulb AZs (WT:  $51.94 \pm 0.55$  nm; KO:  $52.67 \pm 0.54$  nm). We conclude that RIM-BP2 contributes to  
915 normal SV docking and SV organization in close proximity to the membrane of the presynaptic AZ.  
916 These changes seem compatible with the lower number of super-primed SVs, impaired SV  
917 replenishment (Figs. 3 and 7) and the reduced release probability (Fig. 3).

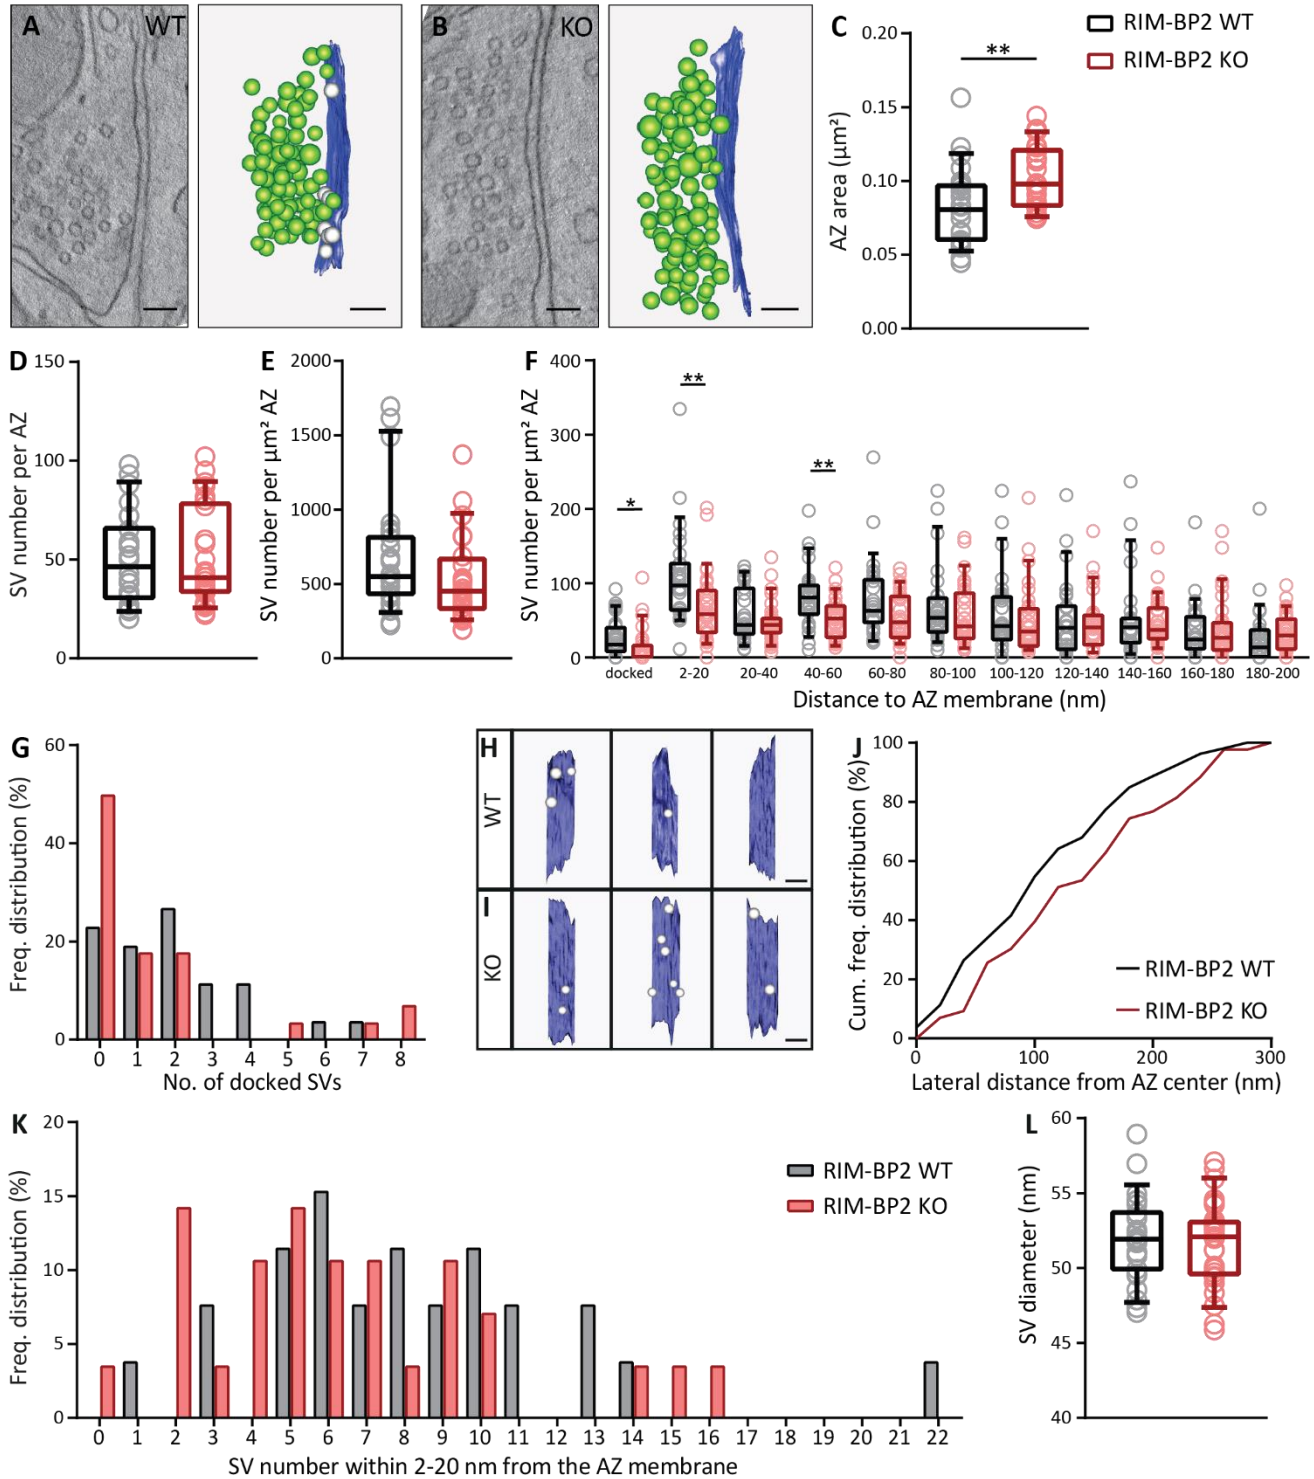

918

919

920 **Figure 10. RIM-BP2 disruption alter the axial SV distribution at the endbulb active zones**

921 **(A, B)** Single virtual sections and corresponding models of representative tomograms of RIM-BP2 WT  
 922 **(A)** and KO **(B)** active zones (AZs) showing the AZ membrane (blue), synaptic vesicles (SVs) (green),

923 and morphologically docked SVs (gray). Scale bars: 100 nm. **(C)** The AZ area estimated by the PSD,  
 924 was significantly larger in the KO endbulb synapses. **\*\**p*-value < 0.01**, Student's t test. Each data point  
 925 represents the AZ area of individual synapses. **(D)** Unaltered total number of SVs in mutant AZs. *p*-  
 926 *value* > 0.05, Student's t test. Each data point represents the number of SVs per AZ of individual  
 927 synapses. **(E)** SV number normalized to the AZ area is unaltered in KO endbulb AZs. *p*-*value* > 0.05,  
 928 Wilcoxon rank test. Each data point represents the number of SVs normalized to the AZ area of  
 929 individual synapses. **(F)** The number of morphologically docked SVs (0-2 nm) and SVs within 200 nm  
 930 from the AZ membrane normalized to the AZ area divided into 20 nm bins. **\**p*-value < 0.05**, **\*\**p*-value**  
 931 **< 0.01**, Wilcoxon rank test. Each data point represents the number of SVs in each bin normalized to  
 932 the AZ area of individual AZs. **(G)** Frequency distribution of the number of morphologically docked  
 933 SVs. **(H,I)** Top views of representative tomogram models of RIM-BP2 WT **(H)** and KO **(I)** AZs with  
 934 docked SVs. Scale bars: 100 nm. **(J)** Cumulative distribution of the lateral distances of morphologically  
 935 docked SVs to the assumed center of the reconstructed AZ. **(K)** Frequency distribution of the SV  
 936 number within 2-20 nm from the AZ membrane. **(L)** Mean SV diameter is unaltered in mutant  
 937 synapses. *p*-*value* > 0.05, Student's t test. Each data point represents the mean diameter of SVs of  
 938 individual synapses. Box and whisker plots present median, lower/upper quartiles, 10–90<sup>th</sup>  
 939 percentiles. RIM-BP2-WT (N = 4; n = 26) in black and RIM-BP2-KO (N = 3; n = 28) in red (N, number of  
 940 animals; n, number of AZs). For details about mean ± SEM, median, and statistics see Table 7.

| Parameter                         |            | RBP2 WT                  | RBP2 KO                  | p value          |
|-----------------------------------|------------|--------------------------|--------------------------|------------------|
| AZ area (μm <sup>2</sup> )        |            | 0.0820 ± 0.0052 (0.0809) | 0.1031 ± 0.0039 (0.0981) | <b>0.0022, T</b> |
| No. of SVs                        |            | 49.81 ± 4.49 (46.50)     | 51.57 ± 4.63 (41.00)     | 0.79, T          |
| No. of SVs per μm <sup>2</sup> AZ | all SVs    | 662.3 ± 77.4 (543.1)     | 523.7 ± 53.4 (443.2)     | 0.14, W          |
|                                   | docked SVs | 27.52 ± 5.24 (18.58)     | 14.64 ± 4.77 (1.72)      | <b>0.015, W</b>  |
|                                   | 2-20 nm    | 109.1 ± 12.8 (98.4)      | 68.16 ± 9.22 (59.32)     | <b>0.006, W</b>  |
|                                   | 20-40 nm   | 58.59 ± 7.14 (45.26)     | 49.68 ± 5.40 (45.20)     | 0.61, W          |
|                                   | 40-60 nm   | 83.25 ± 8.23 (82.21)     | 53.59 ± 5.36 (53.69)     | <b>0.004, W</b>  |
|                                   | 60-80 nm   | 79.81 ± 10.62 (64.31)    | 55.80 ± 6.26 (48.54)     | 0.09, W          |
|                                   | 80-100 nm  | 70.43 ± 10.52 (54.67)    | 59.51 ± 7.92 (43.09)     | 0.39, W          |
|                                   | 100-120 nm | 61.41 ± 11.08 (43.38)    | 51.56 ± 9.16 (36.31)     | 0.51, W          |
|                                   | 120-140 nm | 50.51 ± 10.47 (41.23)    | 48.79 ± 7.41 (41.68)     | 0.64, W          |
|                                   | 140-160 nm | 55.12 ± 11.25 (42.14)    | 47.62 ± 6.21 (38.58)     | 0.82, W          |
|                                   | 160-180 nm | 37.59 ± 7.70 (25.56)     | 40.12 ± 8.33 (27.80)     | 0.92, W          |
|                                   | 180-200 nm | 29.68 ± 8.40 (15.05)     | 33.26 ± 4.97 (31.13)     | 0.20, W          |
| Diameter (nm)                     | all SVs    | 50.99 ± 0.59 (51.68)     | 52.14 ± 0.68 (52.44)     | 0.73, T          |

941

942 **Table 7 – Quantitative analysis of electron tomograms**

943 Data are presented as mean ± SEM and medians are shown in parentheses. Normal distribution was  
 944 assessed with the Jarque-Bera test and equality of variances was assessed with the F-test in normally

945 distributed data. Statistical significance of normally distributed data was determined by unpaired  
946 Student's t-test (denoted as T), while that of the non-normally distributed data was determined by  
947 the Wilcoxon Rank test (denoted as W). n.s.: not significant, \* *p-value* < 0.05, \*\* *p-value* < 0.01.

948

949 **Discussion**

950 Priming of SVs, Cav function as well as the topography of Cav and SV release sites at the AZ, co-  
951 determine the probability of SV release in response to the action potential invading the presynaptic  
952 terminal. Here, we probed the role of RIM-BP2, thought to serve as molecular linker between Cav and  
953 release sites, and alternatively in SV priming via Munc13, in synaptic transmission at the endbulb of  
954 Held synapse. Using super-resolution immunofluorescence and immuno-electron microscopy we  
955 demonstrate that RIM-BP2 disruption alters the topography of Cav2.1 channels at the AZs. Electron  
956 tomography revealed fewer docked and membrane-proximal SVs at the AZ. As a physiological  
957 corollary of these structural changes, we found a reduction in the amplitude of evoked EPSCs,  
958 reduced release probability, and slowed SV replenishment to the RRP. We postulate that RIM-BP2,  
959 likely via interaction with Munc13-1, promotes a 'superprimed' (Taschenberger et al., 2016) or 'tightly  
960 docked' (Neher and Brose, 2018) SV state. Moreover, RIM-BP2 organizes the topography of Cav2.1  
961 channels, tightly coupling them to SV release sites.

962         Synaptic transmission at calyceal synapses of the lower auditory pathway shows impressive  
963 temporal fidelity. At the first central relay of the auditory pathway, co-incident transmission from  
964 endbulbs formed by ANFs drives the postsynaptic BCs at hundreds of Hz and with microsecond  
965 precision as required for time-critical neural computations such as in sound localization (Trussell,  
966 1999; von Gersdorff and Borst, 2002). Such fidelity is enabled by synergistic adaptations on molecular,  
967 synaptic and network levels. In the mouse AVCN, BCs receive input from on average 3-4 endbulbs  
968 (Cao and Oertel, 2010; Butola et al., 2017) with approximately 400 excitatory AZs (Nicol and  
969 Walmsley, 2002; Mendoza Schulz et al., 2014; Butola et al., 2017). Endbulbs feature a large RRP (Lin  
970 et al., 2011) and high release probability (estimates range from 0.2 to 0.7: Oleskevich and Walmsley,  
971 2002; Wang and Manis, 2005; Chanda and Xu-Friedman, 2010; Mendoza Schulz et al., 2014; Butola

972 et al., 2017) which enable massive synchronous parallel release for powerful excitation of BCs. RIM-  
973 BP2 deletion hampers this reliable and temporally precise transmission of auditory information: firing  
974 at sound onset was impaired both in rate and temporal precision (Fig. 5). We mainly attribute the  
975 reduced firing at sound onset (40% reduction) to the observed impairment of endbulb transmission  
976 (EPSC<sub>1</sub> amplitude reduction: 36%, Fig. 1), as the deficit in sound onset coding in RIM-BP2 KO ANF was  
977 mild (approximately 10% reduction in peak onset firing rate, (Krinner et al., 2017)) and convergence  
978 of ANF inputs to BCs is expected to alleviate consequences of impaired ANF coding for BC firing (Joris  
979 et al., 1994; Buran et al., 2010). These results from single-neuron recordings are in good agreement  
980 with previously reported auditory brainstem responses (Krinner et al., 2017), in which the amplitude  
981 reduction was lower for wave I (approximately 30 %) than for wave III (approximately 70%). Wave I  
982 and III are attributed to the synchronized firing of ANFs and cochlear nucleus neurons respectively  
983 (Melcher et al., 1996). Future studies, also employing analysis of gap detection or sound localization  
984 should evaluate the behavioural consequences of this temporal processing deficit.

985         Impaired transmission of sound onset information at RIM-BP2-deficient endbulbs is primarily  
986 rooted in a nearly halved initial release probability, which could be restored to wildtype levels upon  
987 increasing Ca<sup>2+</sup> influx (Fig. 7). We attribute the decreased release probability to i) the altered  
988 topography of Cav2.1 and SVs and ii) to the impaired SV docking at RIM-BP2-deficient endbulb AZs.  
989 Whole-cell patch-clamp recordings showed normal Ca<sup>2+</sup> currents in RIM-BP2-deficient endbulbs (Fig.  
990 2) and confocal imaging of Cav2.1 immunofluorescence semi-quantitatively reported a normal Ca<sup>2+</sup>  
991 channel complement of the AZs (Fig. 8-1). This suggests that unlike ribbon synapses (Krinner et al.,  
992 2017; Luo et al., 2017), RIM-BP2 is not strictly required for establishing a normal presynaptic Cav  
993 complement. However, both FRIL and STED imaging of immunolabeled Cav2.1 channels revealed an  
994 impaired clustering of Cav2.1 at RIM-BP2-deficient endbulb AZs. The number and density of Cav2.1



995 immunogold particles was reduced at the AZs and the nearest neighboring Cav2.1 was further away  
996 from an immunogold particle marking an AZ protein (Table 5). Nonetheless, distribution of the Cav2.1  
997 immunogold particles was significantly different from random, likely reflecting the presynaptic Cav  
998 organization by other multi-domain proteins of the AZ such as RIMs (Han et al., 2011; Kaeser et al.,  
999 2011; Jung et al., 2015) and CAST (Dong et al., 2018; Hagiwara et al., 2018). Immunofluorescence of  
1000 Cav2.1 as well as of bassoon (marking the presynaptic density) was less confined in space and  
1001 immunofluorescent spots were more oval in shape in the absence of RIM-BP2 as compared to  
1002 compact, round spots in the WT (Figs. 8 and 8-2). Moreover, the nearest neighboring  
1003 immunofluorescence spot was further away both for Cav2.1 and bassoon. In summary, our data  
1004 indicate that RIM-BP2 contributes to orchestrating Cav2.1 channels at the AZ. Based on our data and  
1005 in line with previous studies on other synapses (Liu et al., 2011; Acuna et al., 2015; Brockmann et al.,  
1006 2020; Petzoldt et al., 2020), we hypothesize that RIM-BP2 via its interaction with Cav2.1 and AZ  
1007 proteins, contributes to tight coupling of Ca<sup>2+</sup> channels and vesicular release sites also at the endbulb  
1008 of Held synapse. Future experimental and theoretical studies will be needed to further test this  
1009 hypothesis.

1010           Recently, an alternative interaction of RIM-BP2 with the C2B domain of Munc13-1 has been  
1011 reported by which RIM-BP promotes release probability via SV docking/priming (Brockmann et al.,  
1012 2020). The Munc13-1 C2B domain carrying the KW mutation (Shin et al., 2010), showed the highest  
1013 affinity for RIM-BP2 binding. Of note, we did not observe a reduction in Munc13-1 or in any other  
1014 major AZ protein in our semi-quantitative analysis of AZs in RIM-BP2 deficient endbulbs of Held (Fig.  
1015 6). This provides confidence in attributing functional and morphological alterations to the lack of RIM-  
1016 BP2 function rather than to quantitative changes in other AZ proteins. Our functional and electron  
1017 tomographic analysis of SV pool organization at RIM-BP2-deficient endbulbs now provides evidence

1018 for a role of RIM-BP in SV priming, likely via its interaction with Munc13-1. Rigorous electron  
1019 tomography analysis of docking showed nearly halved numbers of morphologically docked SVs  
1020 (defined in a distance from 0-2 nm to the AZ membrane) at RIM-BP2-deficient AZs, which might  
1021 represent a 'tight docking' (Neher and Brose, 2018). We speculate this to indicate that Munc13-1-  
1022 mediated docking that generates primed SVs (Siksoo et al., 2009; Imig et al., 2014) partially depends  
1023 on the interaction with RIM-BP2. The reduction of both docked SVs and those at a distance of 2-20  
1024 nm (membrane proximal SVs) from the plasma membrane might then suggest that the upstream  
1025 loose-docking is rate limiting or less stable in the absence of RIM-BP2. An alternative explanation for  
1026 retarded recovery from depression might be that RIM-BP2 facilitates release site clearance (Neher  
1027 and Sakaba, 2008).

1028           Yet, our analysis of pool dynamics in regular  $[Ca^{2+}]_e$  indicated an unaltered RRP size despite  
1029 the fact that the numbers of docked and membrane-proximal SVs were nearly halved. Interestingly,  
1030 we found a trend toward a smaller RRP in RIM-BP2-deficient endbulbs when restoring release  
1031 probability by enhanced  $Ca^{2+}$  influx. Despite this partial restoration, the first evoked EPSC amplitude  
1032 in the absence of RIM-BP2 was still only 50% of that in the WT synapses (Fig. 7, table 4). This persisting  
1033 difference alludes to a deficit in 'super-primed' (Fig. 3, table 2) or 'tightly docked' SVs (Fig. 10, table  
1034 7). It is tempting to speculate that the impaired SV docking is uncovered under conditions that  
1035 occlude the effect of altered spatial  $Ca^{2+}$  channel-release site coupling on release probability. Our  
1036 morphological analysis of  $Ca^{2+}$  channel-release site coupling is hampered by i) the low number of  
1037 docked SVs in electron tomography and ii) the lack of information on the  $Ca_v$  position in electron  
1038 tomography and of SV docking in FRIL electron micrographs. Nonetheless, there was a trend for  
1039 docked SVs to be further away from the estimated AZ center, possibly reflecting a more random SV  
1040 topography due to lack of RIM-BP2-mediated interaction with  $Ca_v$ s. In addition, or alternatively, the

1041 RRP estimated by SMN/EQ analyses of responses to train stimulation might contain SVs that undergo  
1042 tethering, docking and fusion during the train. Recent work by (Pofantis et al., 2021), showed that  
1043 deleting the presynaptic protein Mover specifically affects the high  $P_r$  component of the RRP at the  
1044 Calyx of Held. Pofantis et al. analysed eEPSC trains with non-negative matrix factorization to reveal  
1045 components representing sub-pools of SVs with different contributions to transmitter release during  
1046 the train. Future studies that tackle how such sub-pools deplete and how they recover from depletion  
1047 in synapses lacking both RIM-BP2 as well as RIM-BP2 and Mover will help to further dissect the  
1048 contributions of RIM-BP2 to SV super-priming and  $Ca_v$  clustering as determinants of  $P_r$ .

1049         Exciting topics for future studies include i) the relative contributions of altered  $Ca^{2+}$  channel-  
1050 release site coupling and impaired SV docking to the reduced release probability, ii) a potential  
1051 contribution of release site clearance to the observed deficit in SV docking, and iii) the molecular  
1052 mechanisms and structure-function relationship of SV replenishment. Our morphological and  
1053 functional experiments indicate that RIM-BP2 takes a role in tethering SVs near the plasma  
1054 membrane *en route* to docking. Functionally, the fast,  $Ca^{2+}$  dependent component of recovery from  
1055 depression due to trains stimulation was hampered. This could reflect a lower local  $[Ca^{2+}]_i$  due to  
1056 mislocalization of  $Ca_v2.1$  channels. Indeed, a key role of  $Ca^{2+}$  in regulating SV replenishment at  
1057 calyceal synapses has been reported in multiple studies (Wang and Kaczmarek, 1998; Hosoi et al.,  
1058 2007). Interestingly, enhancing  $Ca^{2+}$  influx by elevated  $[Ca^{2+}]_e$  uncovered a reduced SV replenishment  
1059 during train stimulation, which would seem reflect a  $Ca^{2+}$  independent limitation e.g. of SV priming.  
1060 Future studies on calyceal synapses of mice carrying mutations that target  $Ca^{2+}$  dependent effects on  
1061 Munc13-1 function and/or the RIM-BP2-Munc13-1 interactions by combined functional and  
1062 ultrastructural analyses will be required to elucidate this intricate process. To best relate AZ structure

1063 and function, future studies will ideally employ optogenetic or electric field stimulation followed by  
1064 high pressure freezing and EM tomography (Watanabe et al., 2013; Imig et al., 2020 p.202).

## 1065 **References**

- 1066 Acuna C, Liu X, Gonzalez A, Südhof TC (2015) RIM-BPs Mediate Tight Coupling of Action Potentials to  
1067 Ca<sup>2+</sup>-Triggered Neurotransmitter Release. *Neuron* 87:1234–1247.
- 1068 Acuna C, Liu X, Südhof TC (2016) How to Make an Active Zone: Unexpected Universal Functional  
1069 Redundancy between RIMs and RIM-BPs. *Neuron* 91:792–807.
- 1070 Brockmann MM, Zarebidaki F, Camacho M, Grauel MK, Trimbuch T, Südhof TC, Rosenmund C (2020)  
1071 A Trio of Active Zone Proteins Comprised of RIM-BPs, RIMs, and Munc13s Governs  
1072 Neurotransmitter Release. *Cell Rep* 32:107960.
- 1073 Buran BN, Strenzke N, Neef A, Gundelfinger ED, Moser T, Liberman MC (2010) Onset coding is  
1074 degraded in auditory nerve fibers from mutant mice lacking synaptic ribbons. *J Neurosci*  
1075 30:7587–7597.
- 1076 Butola T, Wichmann C, Moser T (2017) Piccolo Promotes Vesicle Replenishment at a Fast Central  
1077 Auditory Synapse. *Front Synaptic Neurosci* 9:14.
- 1078 Cao X-J, Oertel D (2010) Auditory Nerve Fibers Excite Targets Through Synapses That Vary in  
1079 Convergence, Strength, and Short-Term Plasticity. *Journal of Neurophysiology* 104:2308–  
1080 2320.
- 1081 Chanda S, Xu-Friedman MA (2010) A Low-Affinity Antagonist Reveals Saturation and Desensitization  
1082 in Mature Synapses in the Auditory Brain Stem. *Journal of Neurophysiology* 103:1915–1926.
- 1083 Dittman JS, Ryan TA (2019) The control of release probability at nerve terminals. *Nature Reviews*  
1084 *Neuroscience* 20:177.
- 1085 Dolphin AC, Lee A (2020) Presynaptic calcium channels: specialized control of synaptic  
1086 neurotransmitter release. *Nat Rev Neurosci* 21:213–229.
- 1087 Dong W, Radulovic T, Goral RO, Thomas C, Suarez Montesinos M, Guerrero-Given D, Hagiwara A,  
1088 Putzke T, Hida Y, Abe M, Sakimura K, Kamasawa N, Ohtsuka T, Young SM (2018) CAST/ELKS  
1089 Proteins Control Voltage-Gated Ca<sup>2+</sup> Channel Density and Synaptic Release Probability at a  
1090 Mammalian Central Synapse. *Cell Rep* 24:284-293.e6.
- 1091 Elmqvist D, Quastel DM (1965) A quantitative study of end-plate potentials in isolated human  
1092 muscle. *J Physiol* 178:505–529.

- 1093 Gebhart M, Juhasz-Vedres G, Zuccotti A, Brandt N, Engel J, Trockenbacher A, Kaur G, Obermair GJ,  
1094 Knipper M, Koschak A, Striessnig J (2010) Modulation of Cav1.3 Ca<sup>2+</sup> channel gating by Rab3  
1095 interacting molecule. *Mol Cell Neurosci* 44:246–259.
- 1096 Grauel MK, Maglione M, Reddy-Alla S, Willmes CG, Brockmann MM, Trimbuch T, Rosenmund T,  
1097 Pangalos M, Vardar G, Stumpf A, Walter AM, Rost BR, Eickholt BJ, Haucke V, Schmitz D,  
1098 Sigrist SJ, Rosenmund C (2016) RIM-binding protein 2 regulates release probability by fine-  
1099 tuning calcium channel localization at murine hippocampal synapses. *PNAS* 113:11615–  
1100 11620.
- 1101 Gundelfinger ED, Fejtova A (2012) Molecular organization and plasticity of the cytomatrix at the  
1102 active zone. *Current Opinion in Neurobiology* 22:423–430.
- 1103 Hagiwara A, Kitahara Y, Grabner CP, Vogl C, Abe M, Kitta R, Ohta K, Nakamura K, Sakimura K, Moser  
1104 T, Nishi A, Ohtsuka T (2018) Cytomatrix proteins CAST and ELKS regulate retinal  
1105 photoreceptor development and maintenance. *J Cell Biol* 217:3993–4006.
- 1106 Han Y, Kaeser PS, Südhof TC, Schneggenburger R (2011) RIM Determines Ca<sup>2+</sup> Channel Density and  
1107 Vesicle Docking at the Presynaptic Active Zone. *Neuron* 69:304–316.
- 1108 Hibino H, Pironkova R, Onwumere O, Vologodskaja M, Hudspeth AJ, Lesage F (2002) RIM - binding  
1109 proteins (RBPs) couple Rab3 - interacting molecules (RIMs) to voltage - gated Ca<sup>2+</sup> channels.  
1110 *Neuron* 34:411–423.
- 1111 Hosoi N, Sakaba T, Neher E (2007) Quantitative Analysis of Calcium-Dependent Vesicle Recruitment  
1112 and Its Functional Role at the Calyx of Held Synapse. *The Journal of Neuroscience* 27:14286–  
1113 14298.
- 1114 Imig C, López-Murcia FJ, Maus L, García-Plaza IH, Mortensen LS, Schwark M, Schwarze V, Angibaud  
1115 J, Nägerl UV, Taschenberger H, Brose N, Cooper BH (2020) Ultrastructural Imaging of  
1116 Activity-Dependent Synaptic Membrane-Trafficking Events in Cultured Brain Slices. *Neuron*  
1117 108:843-860.e8.
- 1118 Imig C, Min S-W, Krinner S, Arancillo M, Rosenmund C, Südhof TC, Rhee J, Brose N, Cooper BH  
1119 (2014) The morphological and molecular nature of synaptic vesicle priming at presynaptic  
1120 active zones. *Neuron* 84:416–431.
- 1121 Isaacson JS, Walmsley B (1995) Receptors underlying excitatory synaptic transmission in slices of the  
1122 rat anteroventral cochlear nucleus. *Journal of Neurophysiology* 73:964–973.
- 1123 Jing Z, Rutherford MA, Takago H, Frank T, Fejtova A, Khimich D, Moser T, Strenzke N (2013)  
1124 Disruption of the presynaptic cytomatrix protein bassoon degrades ribbon anchorage,  
1125 multiquantal release, and sound encoding at the hair cell afferent synapse. *J Neurosci*  
1126 33:4456–4467.
- 1127 Joris PX, Carney LH, Smith PH, Yin TC (1994) Enhancement of neural synchronization in the  
1128 anteroventral cochlear nucleus. I. Responses to tones at the characteristic frequency. *J*  
1129 *Neurophysiol* 71:1022–1036.

- 1130 Jung S, Oshima-Takago T, Chakrabarti R, Wong AB, Jing Z, Yamanbaeva G, Picher MM, Wojcik SM,  
1131 Göttfert F, Predoehl F, Michel K, Hell SW, Schoch S, Strenzke N, Wichmann C, Moser T (2015)  
1132 Rab3-interacting molecules 2 $\alpha$  and 2 $\beta$  promote the abundance of voltage-gated CaV1.3 Ca<sup>2+</sup>  
1133 channels at hair cell active zones. *Proc Natl Acad Sci USA* 112:E3141–E3149.
- 1134 Kaeser PS, Deng L, Wang Y, Dulubova I, Liu X, Rizo J, Südhof TC (2011) RIM proteins tether Ca<sup>2+</sup>  
1135 channels to presynaptic active zones via a direct PDZ-domain interaction. *Cell* 144:282–295.
- 1136 Kaeser PS, Regehr WG (2014) Molecular Mechanisms for Synchronous, Asynchronous, and  
1137 Spontaneous Neurotransmitter Release. *Annual Review of Physiology* 76:333–363.
- 1138 Kiyonaka S, Wakamori M, Miki T, Uriu Y, Nonaka M, Bito H, Beedle AM, Mori E, Hara Y, De Waard M,  
1139 Kanagawa M, Itakura M, Takahashi M, Campbell KP, Mori Y (2007) RIM1 confers sustained  
1140 activity and neurotransmitter vesicle anchoring to presynaptic Ca<sup>2+</sup> channels. *Nat Neurosci*  
1141 10:691–701.
- 1142 Kleindienst D, Montanaro J, Bhandari P, Case MJ, Fukazawa Y, Shigemoto R (2020) Deep Learning-  
1143 Assisted High-Throughput Analysis of Freeze-Fracture Replica Images Applied to Glutamate  
1144 Receptors and Calcium Channels at Hippocampal Synapses. *International Journal of*  
1145 *Molecular Sciences* 21:6737.
- 1146 Krinner S, Butola T, Jung S, Wichmann C, Moser T (2017) RIM-Binding Protein 2 Promotes a Large  
1147 Number of CaV1.3 Ca<sup>2+</sup>-Channels and Contributes to Fast Synaptic Vesicle Replenishment at  
1148 Hair Cell Active Zones. *Front Cell Neurosci* 11:334.
- 1149 Lin K-H, Oleskevich S, Taschenberger H (2011) Presynaptic Ca<sup>2+</sup> influx and vesicle exocytosis at the  
1150 mouse endbulb of Held: a comparison of two auditory nerve terminals. *J Physiol (Lond)*  
1151 589:4301–4320.
- 1152 Liu KSY, Siebert M, Mertel S, Knoche E, Wegener S, Wichmann C, Matkovic T, Muhammad K, Depner  
1153 H, Mettke C, Bückers J, Hell SW, Müller M, Davis GW, Schmitz D, Sigrist SJ (2011) RIM-  
1154 binding protein, a central part of the active zone, is essential for neurotransmitter release.  
1155 *Science* 334:1565–1569.
- 1156 Luján R, Aguado C, Ciruela F, Cózar J, Kleindienst D, de la Ossa L, Bettler B, Wickman K, Watanabe M,  
1157 Shigemoto R, Fukazawa Y (2018) Differential association of GABAB receptors with their  
1158 effector ion channels in Purkinje cells. *Brain Struct Funct* 223:1565–1587.
- 1159 Luo F, Liu X, Südhof TC, Acuna C (2017) Efficient stimulus-secretion coupling at ribbon synapses  
1160 requires RIM-binding protein tethering of L-type Ca<sup>2+</sup> channels. *Proceedings of the National*  
1161 *Academy of Sciences* 114:E8081–E8090.
- 1162 Melcher JR, Guinan Jr JH, Knudson IM, Kiang NYS (1996) Generators of the brainstem auditory  
1163 evoked potential in cat II. Correlating lesion sites with waveform changes. *Hearing research*  
1164 93:28–51.

- 1165 Mendoza Schulz A, Jing Z, Sánchez Caro JM, Wetzel F, Dresbach T, Strenzke N, Wichmann C, Moser T  
1166 (2014) Bassoon-disruption slows vesicle replenishment and induces homeostatic plasticity at  
1167 a CNS synapse. *EMBO J* 33:512–527.
- 1168 Miki T, Kaufmann WA, Malagon G, Gomez L, Tabuchi K, Watanabe M, Shigemoto R, Marty A (2017)  
1169 Numbers of presynaptic Ca<sup>2+</sup> channel clusters match those of functionally defined vesicular  
1170 docking sites in single central synapses. *Proc Natl Acad Sci U S A* 114:E5246–E5255.
- 1171 Moser T, Grabner CP, Schmitz F (2019) Sensory processing at ribbon synapses in the retina and the  
1172 cochlea. *Physiol Rev* 100:103–144.
- 1173 Nakamura Y, Harada H, Kamasawa N, Matsui K, Rothman JS, Shigemoto R, Silver RA, DiGregorio DA,  
1174 Takahashi T (2015) Nanoscale distribution of presynaptic Ca(2+) channels and its impact on  
1175 vesicular release during development. *Neuron* 85:145–158.
- 1176 Neher E (2015) Merits and Limitations of Vesicle Pool Models in View of Heterogeneous Populations  
1177 of Synaptic Vesicles. *Neuron* 87:1131–1142.
- 1178 Neher E, Brose N (2018) Dynamically Primed Synaptic Vesicle States: Key to Understand Synaptic  
1179 Short-Term Plasticity. *Neuron* 100:1283–1291.
- 1180 Neher E, Sakaba T (2008) Multiple roles of calcium ions in the regulation of neurotransmitter  
1181 release. *Neuron* 59:861–872.
- 1182 Nicol MJ, Walmsley B (2002) Ultrastructural basis of synaptic transmission between endbulbs of  
1183 Held and bushy cells in the rat cochlear nucleus. *The Journal of Physiology* 539:713.
- 1184 Oleskevich S, Walmsley B (2002) Synaptic transmission in the auditory brainstem of normal and  
1185 congenitally deaf mice. *The Journal of Physiology* 540:447–455.
- 1186 Pangrsic T, Singer JH, Koschak A (2018) Voltage-Gated Calcium Channels: Key Players in Sensory  
1187 Coding in the Retina and the Inner Ear. *Physiological Reviews* 98:2063–2096.
- 1188 Petzoldt AG et al. (2020) RIM-binding protein couples synaptic vesicle recruitment to release sites.  
1189 *Journal of Cell Biology* 219:e201902059.
- 1190 Picher MM, Opreșoreanu A-M, Jung S, Michel K, Schoch S, Moser T (2017) Rab Interacting Molecules  
1191 2 and 3 Directly Interact with the Pore-Forming Ca<sub>v</sub>1.3 Ca<sup>2+</sup> Channel Subunit and Promote  
1192 Its Membrane Expression. *Front Cell Neurosci* 11 Available at:  
1193 <http://www.ncbi.nlm.nih.gov/pmc/articles/PMC5462952/> [Accessed July 3, 2017].
- 1194 Pofantis E, Neher E, Dresbach T (2021) Regulation of a subset of release-ready vesicles by the  
1195 presynaptic protein Mover. *Proc Natl Acad Sci U S A* 118.
- 1196 Rubio ME, Matsui K, Fukazawa Y, Kamasawa N, Harada H, Itakura M, Molnár E, Abe M, Sakimura K,  
1197 Shigemoto R (2017) The number and distribution of AMPA receptor channels containing fast  
1198 kinetic GluA3 and GluA4 subunits at auditory nerve synapses depend on the target cells.  
1199 *Brain Struct Funct* 222:3375–3393.

- 1200 Sakaba T, Neher E (2001) Quantitative Relationship between Transmitter Release and Calcium  
1201 Current at the Calyx of Held Synapse. *The Journal of Neuroscience* 21:462–476.
- 1202 Schlüter OM, Basu J, Südhof TC, Rosenmund C (2006) Rab3 superprimes synaptic vesicles for  
1203 release: implications for short-term synaptic plasticity. *J Neurosci* 26:1239–1246.
- 1204 Schneggenburger R, Meyer AC, Neher E (1999) Released Fraction and Total Size of a Pool of  
1205 Immediately Available Transmitter Quanta at a Calyx Synapse. *Neuron* 23:399–409.
- 1206 Schneggenburger R, Rosenmund C (2015) Molecular mechanisms governing Ca<sup>2+</sup> regulation of  
1207 evoked and spontaneous release. *Nat Neurosci* 18:935–941.
- 1208 Sclip A, Acuna C, Luo F, Südhof TC (2018) RIM-binding proteins recruit BK-channels to presynaptic  
1209 release sites adjacent to voltage-gated Ca<sup>2+</sup>-channels. *EMBO J* 37.
- 1210 Shin O-H, Lu J, Rhee J-S, Tomchick DR, Pang ZP, Wojcik SM, Camacho-Perez M, Brose N, Machius M,  
1211 Rizo J, Rosenmund C, Südhof TC (2010) Munc13 C2B domain is an activity-dependent Ca<sup>2+</sup>  
1212 regulator of synaptic exocytosis. *Nat Struct Mol Biol* 17:280–288.
- 1213 Siksou L, Varoqueaux F, Pascual O, Triller A, Brose N, Marty S (2009) A common molecular basis for  
1214 membrane docking and functional priming of synaptic vesicles. *European Journal of*  
1215 *Neuroscience* 30:49–56.
- 1216 Strenzke N, Chakrabarti R, Al-Moyed H, Müller A, Hoch G, Pangrsic T, Yamanbaeva G, Lenz C, Pan K-  
1217 T, Auge E, Geiss-Friedlander R, Urlaub H, Brose N, Wichmann C, Reisinger E (2016) Hair cell  
1218 synaptic dysfunction, auditory fatigue and thermal sensitivity in otoferlin Ile515Thr mutants.  
1219 *EMBO J* 35:e201694564.
- 1220 Südhof TC (2012) The Presynaptic Active Zone. *Neuron* 75:11–25.
- 1221 Taberner AM, Liberman MC (2005) Response Properties of Single Auditory Nerve Fibers in the  
1222 Mouse. *J Neurophysiol* 93:557–569.
- 1223 Taschenberger H, Woehler A, Neher E (2016) Superpriming of synaptic vesicles as a common basis  
1224 for intersynapse variability and modulation of synaptic strength. *Proc Natl Acad Sci USA*  
1225 113:E4548–E4557.
- 1226 Thanawala MS, Regehr WG (2013) Presynaptic Calcium Influx Controls Neurotransmitter Release in  
1227 Part by Regulating the Effective Size of the Readily Releasable Pool. *J Neurosci* 33:4625–  
1228 4633.
- 1229 Trussell LO (1999) Synaptic mechanisms for coding timing in auditory neurons. *Annu Rev Physiol*  
1230 61:477–496.
- 1231 von Gersdorff H, Borst JGG (2002) Short-term plasticity at the calyx of held. *Nat Rev Neurosci* 3:53–  
1232 64.



- 1233 Walter AM, Böhme MA, Sigrist SJ (2018) Vesicle release site organization at synaptic active zones.  
1234 *Neurosci Res* 127:3–13.
- 1235 Wang L-Y, Kaczmarek LK (1998) High-frequency firing helps replenish the readily releasable pool of  
1236 synaptic vesicles. *Nature* 394:384–388.
- 1237 Wang Y, Manis PB (2005) Synaptic Transmission at the Cochlear Nucleus Endbulb Synapse During  
1238 Age-Related Hearing Loss in Mice. *J Neurophysiol* 94:1814–1824.
- 1239 Wang Y, O’Donohue H, Manis P (2011) Short-term plasticity and auditory processing in the ventral  
1240 cochlear nucleus of normal and hearing-impaired animals. *Hearing Research* 279:131–139.
- 1241 Watanabe S, Rost BR, Camacho-Pérez M, Davis MW, Söhl-Kielczynski B, Rosenmund C, Jorgensen  
1242 EM (2013) Ultrafast endocytosis at mouse hippocampal synapses. *Nature* 504:242–247.
- 1243 Wu SH, Oertel D (1984) Intracellular injection with horseradish peroxidase of physiologically  
1244 characterized stellate and bushy cells in slices of mouse anteroventral cochlear nucleus. *J*  
1245 *Neurosci* 4:1577–1588.
- 1246 Yang H, Xu-Friedman MA (2008) Relative Roles of Different Mechanisms of Depression at the Mouse  
1247 Endbulb of Held. *Journal of Neurophysiology* 99:2510–2521.
- 1248 Yu W-M, Goodrich LV (2014) Morphological and physiological development of auditory synapses.  
1249 *Hearing Research* 311:3–16.
- 1250
